# Supplementary material
Source: PubMed Central journal article supplement (PMC3686493)
Supplement: NIHMS471691-supplement-1_si_001.pdf [file NIHMS471691-supplement-1_si_001.pdf]

**Mild Aromatic Palladium-Catalyzed Protodecarboxylation: Kinetic Assessment of the Decarboxylative Palladation and the Protodepalladation Steps**

Joshua S. Dickstein, John M. Curto, Osvaldo Gutierrez, Carol A. Mulrooney, and Marisa C. Kozlowski\*

*Department of Chemistry, Roy and Diana Vagelos Laboratories, University of Pennsylvania, Philadelphia, Pennsylvania 19104*

*Supporting Information*

|                                                          |                |
|----------------------------------------------------------|----------------|
| <b>General Considerations</b>                            | <b>S2</b>      |
| <b>GC Calibration</b>                                    | <b>S3-S5</b>   |
| <b>Kinetic Studies on Decarboxylative Palladation</b>    | <b>S5-S12</b>  |
| <b>Computational Work on Decarboxylative Palladation</b> | <b>S12-S13</b> |
| <b>Kinetic Studies on Protodepalladation</b>             | <b>S13-S18</b> |
| <b>Kinetic Studies with Catalytic Palladium</b>          | <b>S18-S25</b> |
| <b>Hammett Study on Aromatic Decarboxylation</b>         | <b>S25-S27</b> |
| <b>References</b>                                        | <b>S27</b>     |
| <b>Spectral Data</b>                                     | <b>S28-39</b>  |
| <b>Coordinates and Energies from Computational Work</b>  | <b>S40-S67</b> |

## *General Considerations*

Unless otherwise stated all solvents and reagents were ACS reagent grade and were used without further purification. When necessary, solvents and reagents were dried prior to use. DMSO and DMF were distilled from BaO. Biphenyl was recrystallized from ethanol prior to use. Palladium(II) trifluoroacetate was purchased from either Acros or Strem. Analytical thin layer chromatography (TLC) was performed on EM Reagents 0.25 mm silica-gel plates. Yields refer to isolated material judged to be  $\geq 95\%$  pure by  $^1\text{H}$  NMR spectroscopy following silica gel chromatography with Silia-P flash silica gel (50-63  $\mu\text{m}$  mesh particle size). Due to the volatility of some of the products, rotary evaporation was avoided as much as possible. With these sensitive products, the solvent was slowly evaporated on the bench-top. In addition, chromatography on these products was performed with the most volatile solvent system possible and the fractions were concentrated by slow evaporation on the bench-top.

$^1\text{H}$  NMR and  $^{13}\text{C}$  NMR spectra were recorded on a 500 MHz spectrometer or 300 MHz spectrometer. Chemical shifts are reported in parts per million (ppm) from tetramethylsilane (0 ppm) or from the solvent resonance ( $\text{CDCl}_3$  7.26 ppm,  $\text{DMSO-d}_6$  2.50 ppm). Data are reported as follows: chemical shift, multiplicity (s = singlet, d = doublet, t = triplet, q = quartet, dd = doublet of doublets, br = broad, m = multiplet), coupling constants, and number of protons. Proton decoupled  $^{13}\text{C}$  NMR spectra were recorded on a 125 MHz spectrometer. Chemical shifts are reported in ppm from the solvent resonance ( $\text{CDCl}_3$  77.16 ppm).

Mass spectra were obtained utilizing high resonance with an ionization mode of either CI or ES or LC-TOF mass spectrometer using EI in positive or negative mode. Melting points are uncorrected.

GC analysis for reactions was conducted on an HP-1 column (Agilent): length = 30 m, ID = 0.32 mm, film = 0.25 mm, flow = 2 mL/min, Carrier gas =  $\text{N}_2$ , Detector (FID) = 250  $^\circ\text{C}$ , Injector = 250  $^\circ\text{C}$ , Pressure = 21.25 psi.

### GC Calibration Procedure

Biphenyl (3.85 g, 0.025 mol) was diluted to 1.0 M with CH<sub>2</sub>Cl<sub>2</sub> in a 25 mL volumetric flask. 2,6-Dimethoxybenzoic acid, **6a**, (4.55 g, 0.025 mol) was diluted to 1.0 M with MeOH in a 25 mL volumetric flask. 1,3-Dimethoxybenzene, **8a**, (4.55 g, 0.033 mol) was diluted to 1.3 M with CH<sub>2</sub>Cl<sub>2</sub> in a 25 mL volumetric flask. The samples were examined by combining known volumes of each stock solution. Each sample was then diluted (100 μL in 1.5 mL CH<sub>2</sub>Cl<sub>2</sub>) and injected three times on the GC. The average ratio of the peak areas was used to calibrate each analyte with respect to the internal standard of biphenyl. The calibration curves for **6a** and **8a** are shown below.

#### Calibration of 2,6-Dimethoxybenzoic Acid (**6a**) to Biphenyl

**Table S1** Primary data for the calibration of **6a**<sup>a</sup>

| mmol <b>6a</b> /mmol <b>Biphenyl</b> | Area <b>6a</b> /Area <b>Biphenyl</b> <sup>b</sup> |
|--------------------------------------|---------------------------------------------------|
| 0.2                                  | 0.1374                                            |
| 0.5                                  | 0.2511                                            |
| 1.0                                  | 0.4076                                            |
| 2.0                                  | 1.0583                                            |
| 5.0                                  | 2.7419                                            |

<sup>a</sup>GC Method: Flow = 2 mL/min; Hold oven temperature for time given = 80 °C/5 min; Ramp rate of oven temperature in °C/min = 10 °C/min; Hold oven temperature for time given = 130 °C/3 min. Retention times: t<sub>R</sub>(**6a**) = 9.9 min, t<sub>R</sub>(**Biphenyl**) = 5.5 min. Correction factor for **6a**; y = 1.80x. <sup>b</sup>Average of three injections on GC.

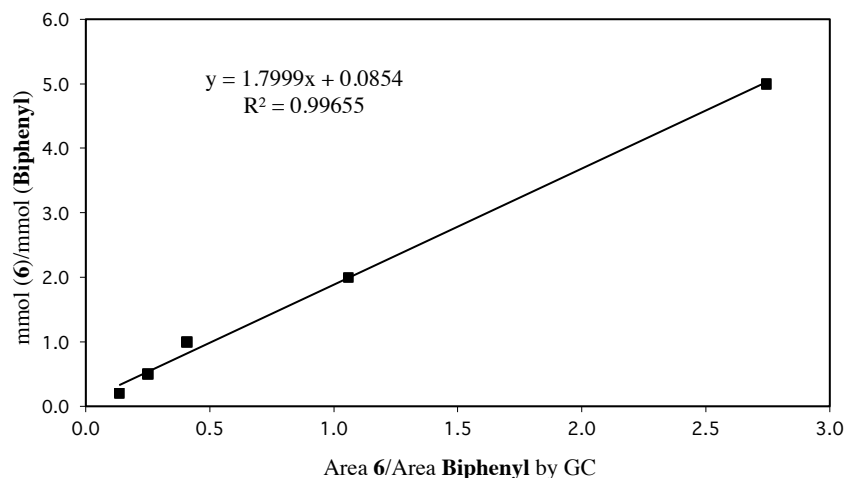

**Figure S1** GC Calibration Curve for **6a**

### Calibration of 1,3-Dimethoxybenzene (**8a**) to Biphenyl

**Table S2** Primary data for the calibration of **8a**<sup>a</sup>

| mmol <b>8a</b> /mmol <b>Biphenyl</b> | Area <b>8a</b> /Area <b>Biphenyl</b> <sup>b</sup> |
|--------------------------------------|---------------------------------------------------|
| 0.2638                               | 0.1346                                            |
| 0.6594                               | 0.3368                                            |
| 1.3188                               | 0.6971                                            |
| 2.6376                               | 1.3494                                            |
| 6.5940                               | 3.7586                                            |

<sup>a</sup>GC Method: Flow = 2 mL/min; Hold oven temperature for time given = 80 °C/5 min; Ramp rate of oven temperature in °C/min = 10 °C/min; Hold oven temperature for time given = 130 °C/3 min. Retention times:  $t_R(\mathbf{8a}) = 1.6$  min,  $t_R(\mathbf{Biphenyl}) = 5.5$  min. Correction factor for **8a**;  $y = 1.74x$ . <sup>b</sup>Average of three injections on GC.

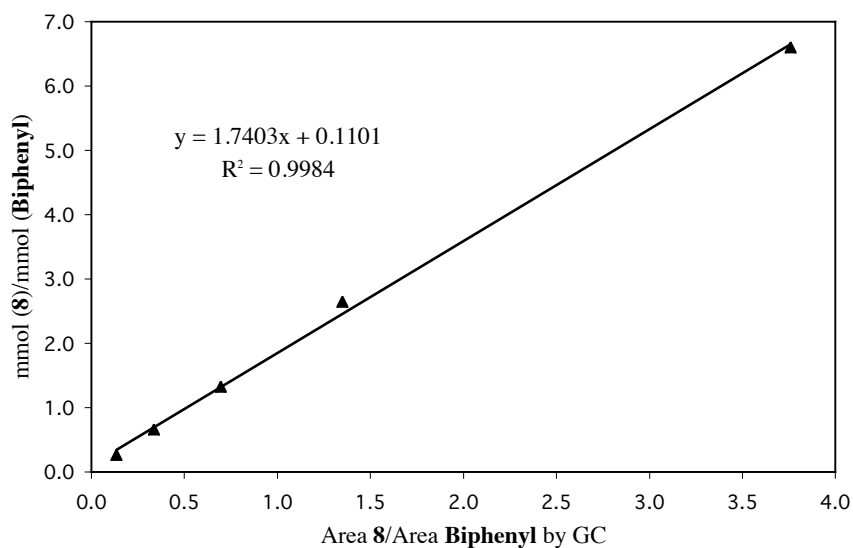

**Figure S2** GC Calibration Curve for **8a**

### GC Reaction Monitoring for Table 1

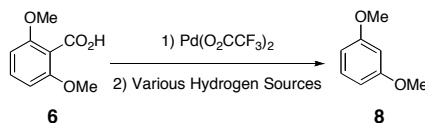

To a solution of **6a** (60 mg, 0.33 mmol) in the appropriate solvent (3.0 mL), was added palladium (II) trifluoroacetate (110 mg, 0.33 mmol) and biphenyl (51 mg, 0.33 mmol). The reaction mixture was then heated at 70 °C for 1 h. To this solution was added the appropriate hydrogen/hydride source at the temperature specified in Tables 1.1-1.3 above. At regular intervals, aliquots (~100  $\mu$ L) were removed. To this aliquot was added 1 M HCl and EtOAc. The solution was then shaken and the organic phase was filtered through SiO<sub>2</sub> (10% MeOH/CH<sub>2</sub>Cl<sub>2</sub>). The sample was then analyzed by gas chromatography (GC) using the conditions described above.

### <sup>1</sup>H NMR Monitoring of the Decarboxylative Palladation of **6** to **7** (Figure 1)

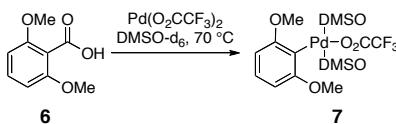

To a solution of 2,6-dimethoxybenzoic acid, **6a**, (12 mg, 0.066 mmol) in DMSO-d<sub>6</sub> (0.75 ml) was added palladium(II) trifluoroacetate (26 mg, 0.079 mmol). A <sup>1</sup>H NMR

spectrum was then taken. The mixture was then warmed to 70 °C and spectra were taken periodically throughout the course of the reaction. Ratios of **6a**:**7a**:**8a** were determined by comparison of <sup>1</sup>H NMR integrations and the final data is presented in **Table S3**. The relevant <sup>1</sup>H NMR chemical shifts for **6a**, **7a**, and **8a** are listed in **Table S4**.

**Table S3** Data Presented in **Figure 1** from <sup>1</sup>H NMR Measurements

| Time (min) | [ <b>6a</b> ] (M) | Time (min) | [ <b>6a</b> ] (M) | Time (min) | [ <b>6a</b> ] (M) |
|------------|-------------------|------------|-------------------|------------|-------------------|
| 0.0        | 0.088             | 9.0        | 0.046             | 23.0       | 0.024             |
| 3.0        | 0.075             | 10.0       | 0.043             | 33.0       | 0.016             |
| 5.0        | 0.063             | 11.0       | 0.041             | 43.0       | 0.012             |
| 6.0        | 0.060             | 12.0       | 0.040             | 55.0       | 0.009             |
| 7.0        | 0.056             | 13.0       | 0.038             |            |                   |
| 8.0        | 0.050             | 18.0       | 0.029             |            |                   |

**Table S4** <sup>1</sup>H NMR Chemical Shifts of **6a**, **7a**, and **8a** in DMSO-d<sub>6</sub>.

| 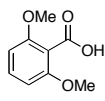 |  |  |
|------------------------------------------------------------------------------------|------------------------------------------------------------------------------------|-------------------------------------------------------------------------------------|
| <b>6</b>                                                                           | <b>7</b>                                                                           | <b>8</b>                                                                            |
| 7.27 (1H)                                                                          | 7.05 (1H)                                                                          | 7.14 (1H)                                                                           |
| 6.64 (2H)                                                                          | 6.35 (2H)                                                                          | 6.47 (2H)                                                                           |
| 3.74 (6H)                                                                          | 3.84 (6H)                                                                          | 6.43 (1H)                                                                           |
|                                                                                    |                                                                                    | 3.71 (6H)                                                                           |

### <sup>1</sup>H NMR Monitoring of the Acid Effect on Decarboxylative Palladation (Figure 2)

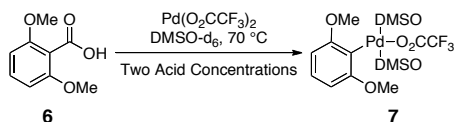

To a solution of 2,6-dimethoxybenzoic acid, **6a**, (12 mg, 0.066 mmol) in DMSO-d<sub>6</sub> (0.75 ml) was added palladium(II) trifluoroacetate (26 mg, 0.079 mmol). A <sup>1</sup>H NMR spectrum was then taken. The mixture was then warmed to 70 °C and spectra were taken periodically throughout the course of the reaction. A second experiment with 10 equiv of CH<sub>3</sub>SO<sub>3</sub>H (43 μL, 0.066 mmol) was conducted in the same manner and the two

experiments were compared. Ratios of **6a**:**7a**:**8a** were determined by comparison of  $^1\text{H}$  NMR integrations and the final data is presented in **Table S3** and **Table S5**.

**Table S5** Data Presented in **Figure 2** from  $^1\text{H}$  NMR Measurements

| Time (min) | [ <b>6a</b> ] (M) | Time (min) | [ <b>6a</b> ] (M) |
|------------|-------------------|------------|-------------------|
| 2.0        | 0.083             | 60.0       | 0.042             |
| 10.0       | 0.073             | 90.0       | 0.032             |
| 20.0       | 0.064             | 120.0      | 0.025             |
| 40.0       | 0.053             |            |                   |

### Acid Equilibrium Experiment of **6a** to **9a** (Scheme 5 and Figure 3)

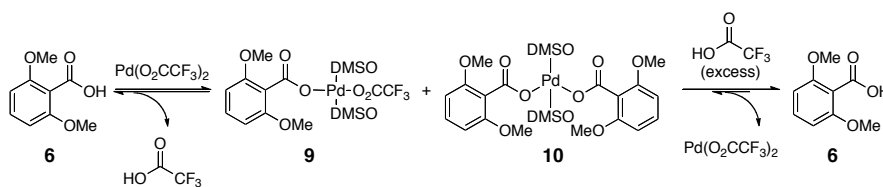

A  $^1\text{H}$  NMR spectrum of a solution of 2,6-dimethoxybenzoic acid, **6a**, (12 mg, 0.066 mmol) in DMSO- $d_6$  (0.75 ml) was taken. Then palladium(II) trifluoroacetate (22 mg, 0.066 mmol) was added and a second  $^1\text{H}$  NMR spectrum was taken. Following that, trifluoroacetic acid (49  $\mu\text{L}$ , 0.66 mmol) was added and a final  $^1\text{H}$  NMR spectrum was obtained. The overlay of the three spectra depicting the shift in the equilibrium is shown in **Figure S3**.

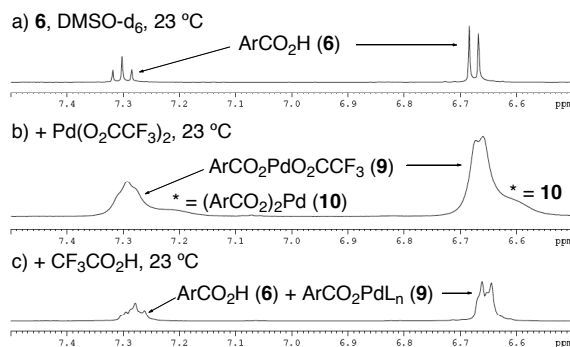

**Figure S3**  $^1\text{H}$  NMR Study of Acid Effect on Ligand Exchange. a)  $^1\text{H}$  NMR spectrum of 2,6-dimethoxybenzoic acid (**6a**) in DMSO- $d_6$  at 23 °C. b)  $^1\text{H}$  NMR spectrum after addition of 1 equivalent  $\text{Pd}(\text{O}_2\text{CCF}_3)_2$  at 23 °C. c)  $^1\text{H}$  NMR spectrum after addition of 10 equivalents of  $\text{CF}_3\text{CO}_2\text{H}$  at 23 °C.

### Decarboxylative Palladation Eyring Analysis (Figure 3).

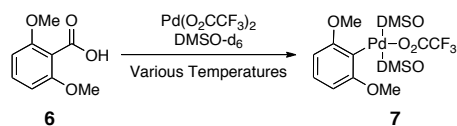

To a solution of 2,6-dimethoxybenzoic acid, **6a**, (12 mg, 0.066 mmol) in DMSO- $d_6$  (0.75 ml) was added palladium(II) trifluoroacetate (26 mg, 0.079 mmol). A  $^1\text{H}$  NMR spectrum was then taken. The mixture was then warmed to 50 °C and spectra were taken periodically throughout the course of the reaction. Three more experiments were conducted in the same manner at different temperatures (70, 90, and 110 °C) and then all four experiments were compared. Ratios of **6a**:**7a**:**8a** were determined by comparison of  $^1\text{H}$  NMR integrations and the final data is presented in **Table S3** (70 °C reaction), **Table S6**, **Table S7**, and **Table S8**. The rate data is shown in **Table S9**.

**Table S6** Data Presented in **Table S9** from  $^1\text{H}$  NMR Measurements at 50 °C

| Time (min) | [ <b>6a</b> ] (M) | Time (min) | [ <b>6a</b> ] (M) | Time (min) | [ <b>6a</b> ] (M) |
|------------|-------------------|------------|-------------------|------------|-------------------|
| 0          | 0.088             | 40         | 0.067             | 150        | 0.042             |
| 2          | 0.085             | 60         | 0.060             | 180        | 0.038             |
| 10         | 0.081             | 90         | 0.052             | 240        | 0.032             |
| 20         | 0.076             | 120        | 0.047             | 265        | 0.028             |

**Table S7** Data Presented in **Table S9** from  $^1\text{H}$  NMR Measurements at 90 °C

| Time (min) | [ <b>6a</b> ] (M) | Time (min) | [ <b>6a</b> ] (M) | Time (min) | [ <b>6a</b> ] (M) |
|------------|-------------------|------------|-------------------|------------|-------------------|
| 0          | 0.088             | 5          | 0.010             | 9          | 0.003             |
| 1.5        | 0.045             | 6          | 0.007             | 10         | 0.002             |
| 3          | 0.021             | 7          | 0.005             |            |                   |
| 4          | 0.013             | 8          | 0.004             |            |                   |

**Table S8** Data Presented in **Table S9** from  $^1\text{H}$  NMR Measurements at 110 °C

| Time (min) | [ <b>6a</b> ] (M) | Time (min) | [ <b>6a</b> ] (M) |
|------------|-------------------|------------|-------------------|
| 0.5        | 0.085             | 2.5        | 0.007             |
| 1          | 0.049             | 3          | 0.005             |
| 1.5        | 0.023             | 3.5        | 0.002             |



|   |       |
|---|-------|
| 2 | 0.013 |
|---|-------|

**Table S9** Decarboxylative Palladation Rates at Different Temperatures<sup>a</sup>

| T   | k (s <sup>-1</sup> )   | t <sub>1/2</sub> |
|-----|------------------------|------------------|
| 50  | 7.0 x 10 <sup>-5</sup> | 2.8 h            |
| 70  | 6.7 x 10 <sup>-4</sup> | 17 min           |
| 90  | 5.9 x 10 <sup>-3</sup> | 2.0 min          |
| 110 | 2.0 x 10 <sup>-2</sup> | 35 sec           |

<sup>a</sup> Reaction conditions: initial concentration [**6a**] = 0.09 M and [Pd(O<sub>2</sub>CCF<sub>3</sub>)<sub>2</sub>] = 0.11 M, 0.75 mL DMSO-d<sub>6</sub>. The Eyring equation is  $\ln(kh/\kappa k_B T) = -(\Delta H^\ddagger/R)(1/T) + \Delta S^\ddagger/R$  where *k* is the experimentally determined rate, *h* is Planck's constant,  $\kappa$  is the transmission coefficient (and is assumed to be 1), *k<sub>B</sub>* is Boltzmann's constant, *T* is the temperature of the reaction, and *R* is the gas constant. The Gibbs free energy is calculated using  $\Delta G^\ddagger_{298} = \Delta H^\ddagger - T\Delta S^\ddagger$ .

#### <sup>1</sup>H NMR Hammett Study of Decarboxylative Palladation (Figure 4)

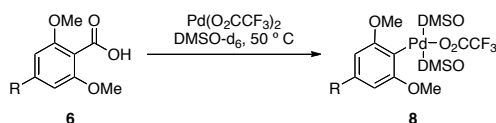

To a solution of 2,6-dimethoxy-4-methylbenzoic acid, (**6b**, R = Me), (13 mg, 0.066 mmol) in DMSO-d<sub>6</sub> (0.75 ml) was added palladium(II) trifluoroacetate (26 mg, 0.079 mmol). A <sup>1</sup>H NMR spectrum was then taken. The mixture was then warmed to 50 °C and spectra were taken periodically throughout the course of the reaction. Experiments with **6a** and **6c** (R = H and Cl) were conducted in the same manner and all three experiments were used to construct **Figure 4**. Ratios of the carboxylic acid starting materials, aryl palladium intermediates, and protodecarboxylated products were determined by comparison of <sup>1</sup>H NMR integrations and the final data is presented in **Table S6** (**6a**, R = H), **Table S10**, (**6b**, R = Me), and **Table S12** (**6c**, R = Cl). The relevant <sup>1</sup>H NMR chemical shifts are listed in **Table S4** (**6a**, R = H), **Table S11** (**6b**, R = Me), and **Table S13** (**6c**, R = Cl).

**Table S10** Data Presented in **Figure 4** from <sup>1</sup>H NMR Measurements of Decarboxylative Palladation of **6b** (R = Me) at 50 °C

| Time (h) | [ <b>6b</b> , R = Me] (M) |
|----------|---------------------------|
| 0.5      | 0.047                     |

|     |       |
|-----|-------|
| 1   | 0.034 |
| 1.5 | 0.027 |
| 2   | 0.022 |
| 2.5 | 0.019 |

**Table S11**  $^1\text{H}$  NMR Chemical Shifts of **6b**, **7b**, and **8b** (R = Me) in DMSO- $d_6$ .

| 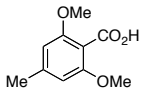<br><b>6, R = Me</b> | <br><b>7, R = Me</b> | <br><b>8, R = Me</b> |
|-------------------------------------------------------------------------------------------------------|-------------------------------------------------------------------------------------------------------|--------------------------------------------------------------------------------------------------------|
| 6.49 (2H)<br>3.72 (6H)<br>2.30 (3H)                                                                   | 6.24 (2H)<br>3.81 (6H)<br>2.27 (3H)                                                                   | 6.31 (2H)<br>6.25 (1H)<br>3.69 (6H)<br>2.22 (3H)                                                       |

**Table S12** Data Presented in **Figure 4** from  $^1\text{H}$  NMR Measurements of Decarboxylative Palladation of **6c** (R = Cl) at 50 °C

| Time (min) | [ <b>6c</b> , R = Cl] (M) | Time (min) | [ <b>6c</b> , R = Cl] (M) |
|------------|---------------------------|------------|---------------------------|
| 0          | 0.086                     | 3          | 0.060                     |
| 0.5        | 0.080                     | 4          | 0.055                     |
| 1          | 0.076                     | 6          | 0.046                     |
| 2          | 0.067                     | 8.5        | 0.041                     |

**Table S13**  $^1\text{H}$  NMR Chemical Shifts of **6c**, **7c**, and **8c** (R = Cl) in DMSO- $d_6$ .

| 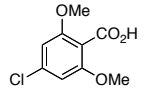<br><b>6, R = Cl</b> | <br><b>7, R = Cl</b> | <br><b>8, R = Cl</b> |
|---------------------------------------------------------------------------------------------------------|---------------------------------------------------------------------------------------------------------|----------------------------------------------------------------------------------------------------------|
| 6.76 (2H)<br>3.75 (6H)                                                                                  | 6.43 (2H)<br>3.82 (6H)                                                                                  | 6.55 (2H)<br>6.42 (1H)<br>3.70 (6H)                                                                      |

**Table S14** Rate Data from Hammett Study of Decarboxylative Palladation

| Substrate                                                                                              | $\sigma_{\text{para}}$ values | $k$ ( $\text{s}^{-1}$ ) |
|--------------------------------------------------------------------------------------------------------|-------------------------------|-------------------------|
| 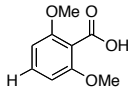<br><b>6</b> , R = H  | 0.00                          | $6.95 \times 10^{-5}$   |
| <br><b>6</b> , R = Me | -0.14                         | $1.28 \times 10^{-4}$   |
| <br><b>6</b> , R = Cl | 0.24                          | $2.50 \times 10^{-5}$   |

**Decarboxylative Palladation of 2,4,6-Trimethoxybenzoic Acid (6d)**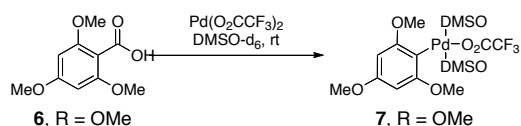

To a solution of 2,4,6-trimethoxybenzoic acid, (**6d**), (14 mg, 0.066 mmol) in DMSO- $d_6$  (0.75 ml) was added palladium(II) trifluoroacetate (26 mg, 0.079 mmol).  $^1\text{H}$  NMR spectra were taken periodically throughout the course of the reaction. The ratio of **6d**:**7d**:**8d** (R = OMe) was determined by comparison of  $^1\text{H}$  NMR integrations and the final data is presented in **Table S15**. The relevant  $^1\text{H}$  NMR chemical shifts are listed in **Table S16**.

**Table S15** Data from the  $^1\text{H}$  NMR Measurements of Decarboxylative Palladation of **6d** (R = OMe) at Room Temperature

| Time (h) | [ <b>6d</b> , R = OMe] (M) |
|----------|----------------------------|
| 0        | 0.088                      |
| 0.25     | 0.072                      |
| 0.5      | 0.057                      |
| 1        | 0.045                      |
| 2        | 0.033                      |
| 4        | 0.023                      |

**Table S16** <sup>1</sup>H NMR Chemical Shifts of **6d**, **7d**, and **8d** (R = OMe) in DMSO-d<sub>6</sub>.

| 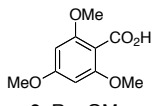<br><b>6</b> , R = OMe | <br><b>7</b> , R = OMe | <br><b>8</b> , R = OMe |
|---------------------------------------------------------------------------------------------------------|---------------------------------------------------------------------------------------------------------|----------------------------------------------------------------------------------------------------------|
| 6.23 (2H)<br>3.79 (3H)<br>3.74 (6H)                                                                     | 6.06 (2H)<br>3.81 (6H)<br>3.73 (3H)                                                                     | 6.08 (3H)<br>3.69 (9H)                                                                                   |

### Computational Work for Electrophilic Intramolecular Palladation followed by Decarboxylation (Figure 5)

All calculations were carried using B3LYP<sup>1,2,3</sup> or B3PW91<sup>1,4,5,6</sup> functionals using 6-31G(d) basis for main group elements and SDD or LANL2DZ for Pd in gas phase or in solvent (diethyl ether) using CPCM<sup>7</sup> solvation model. All stationary points were characterized as minima or transition state structures using frequency analysis. Intermediates **12** and **12a** differ in conformation of aryl ring in which aryl ring facing away from Pd is favored in all cases, presumably to avoid steric interactions with the CO<sub>2</sub>CF<sub>3</sub> moiety.

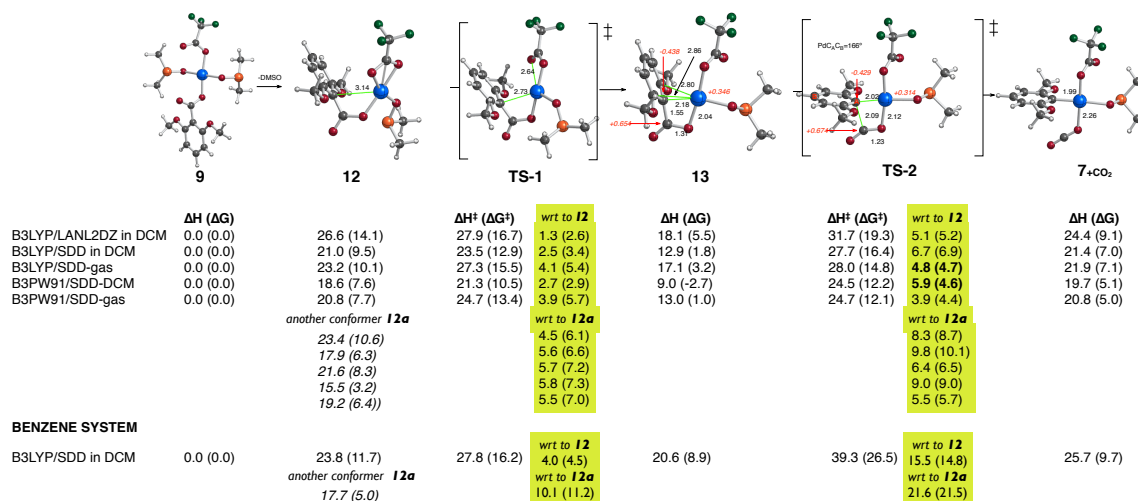

**Figure S4** Relative enthalpies and free energies, in parenthesis, (kcal/mol; 298.15 K) calculated using either B3LYP or B3PW91 functional and 6-31G(d) basis for main group

elements and SDD (or LANL2DZ) for Pd in DCM (CPCM). Coordinates can be found on S40-S68.

Full Reference of Gaussian09:

Gaussian 09, Revision C.01,

M. J. Frisch, G. W. Trucks, H. B. Schlegel, G. E. Scuseria, M. A. Robb, J. R. Cheeseman, G. Scalmani, V. Barone, B. Mennucci, G. A. Petersson, H. Nakatsuji, M. Caricato, X. Li, H. P. Hratchian, A. F. Izmaylov, J. Bloino, G. Zheng, J. L. Sonnenberg, M. Hada, M. Ehara, K. Toyota, R. Fukuda, J. Hasegawa, M. Ishida, T. Nakajima, Y. Honda, O. Kitao, H. Nakai, T. Vreven, J. A. Montgomery, Jr., J. E. Peralta, F. Ogliaro, M. Bearpark, J. J. Heyd, E. Brothers, K. N. Kudin, V. N. Staroverov, T. Keith, R. Kobayashi, J. Normand, K. Raghavachari, A. Rendell, J. C. Burant, S. S. Iyengar, J. Tomasi, M. Cossi, N. Rega, J. M. Millam, M. Klene, J. E. Knox, J. B. Cross, V. Bakken, C. Adamo, J. Jaramillo, R. Gomperts, R. E. Stratmann, O. Yazyev, A. J. Austin, R. Cammi, C. Pomelli, J. W. Ochterski, R. L. Martin, K. Morokuma, V. G. Zakrzewski, G. A. Voth, P. Salvador, J. J. Dannenberg, S. Dapprich, A. D. Daniels, O. Farkas, J. B. Foresman, J. V. Ortiz, J. Cioslowski, and D. J. Fox, Gaussian, Inc., Wallingford CT, 2010.

### <sup>1</sup>H NMR Monitoring of the Protodepalladation of **7a** to **8a** (Figure 6)

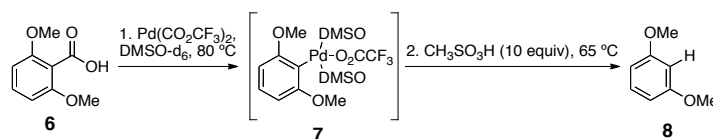

To a solution of 2,6-dimethoxybenzoic acid, **6a**, (12 mg, 0.066 mmol) in  $\text{DMSO-d}_6$  (0.75 mL) was added palladium(II) trifluoroacetate (26 mg, 0.079 mmol). The mixture was heated at  $80\text{ }^\circ\text{C}$  for 1 h, cooled to room temperature, and a  $^1\text{H}$  NMR spectrum was taken. Methanesulfonic acid (43  $\mu\text{L}$ , 0.66 mmol) was added and the mixture was heated to  $65\text{ }^\circ\text{C}$ .  $^1\text{H}$  NMR spectra were then taken periodically throughout the course of the reaction. Ratios of **6a**:**7a**:**8a** were determined by comparison of  $^1\text{H}$  NMR integrations and the final data is presented in **Table S17**.

**Table S17** Data Presented in **Figure 6a** from  $^1\text{H}$  NMR Measurements

| Time (h) | [ <b>7a</b> ] (M) | Time (h) | [ <b>7a</b> ] (M) |
|----------|-------------------|----------|-------------------|
| 1        | 0.081             | 29       | 0.022             |
| 2        | 0.079             | 47       | 0.009             |
| 8        | 0.063             | 75       | 0.000             |

**<sup>1</sup>H NMR Monitoring of the Acid Effect on Protodepalladation**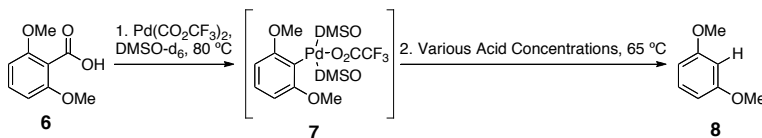

To a solution of 2,6-dimethoxybenzoic acid, **6a**, (12 mg, 0.066 mmol) in DMSO-d<sub>6</sub> (0.75 mL) was added palladium(II) trifluoroacetate (26 mg, 0.079 mmol). The mixture was heated at 80 °C for 1 h, cooled to room temperature, and a <sup>1</sup>H NMR spectrum was taken. Methanesulfonic acid (43 μL, 0.66 mmol) was added and the mixture was heated to 65 °C. <sup>1</sup>H NMR spectra were then taken periodically throughout the course of the reaction. The same experiment was also conducted with various amounts of CH<sub>3</sub>SO<sub>3</sub>H and then all experiments were compared. Ratios of **6a**:**7a**:**8a** were determined by comparison of <sup>1</sup>H NMR integrations and the final data is presented in **Table S18**, **Table S19**, and **Table S20**. The equivalents of acid are based on the amount of methanesulfonic acid added to the reaction plus the one equivalent of trifluoroacetic acid liberated from palladium(II) trifluoroacetate during the reaction. The Lineweaver-Burke plot is depicted in **Figure S5**.

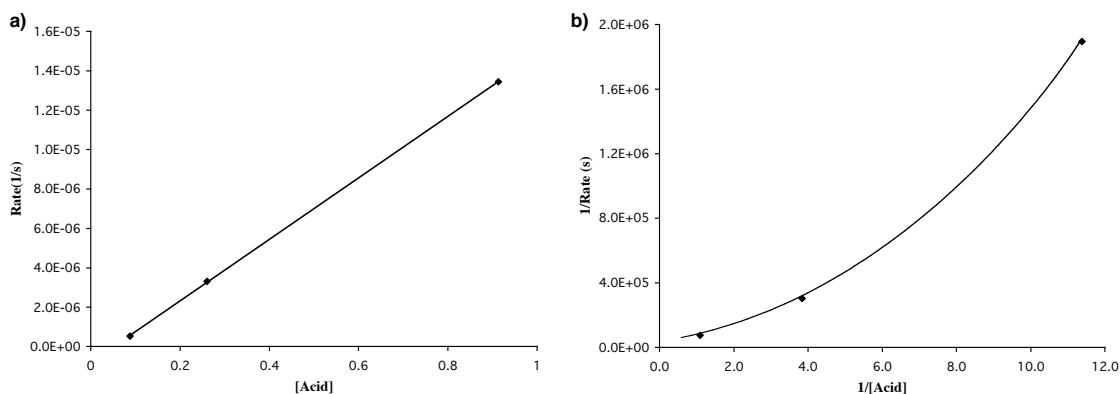

**Figure S5** Acid Effect on the Protodepalladation of **7a** as Monitored by <sup>1</sup>H NMR Spectroscopy. Compound **6a** was mixed with Pd(O<sub>2</sub>CCF<sub>3</sub>)<sub>2</sub> in 0.75 mL DMSO-d<sub>6</sub> and heated to 80 °C for 1 h. After cooling, a <sup>1</sup>H NMR spectrum was taken, CH<sub>3</sub>SO<sub>3</sub>H was added, and <sup>1</sup>H NMR monitoring was continued at 65 °C. Three different acid concentrations were examined. Reaction conditions: a) [**6a**] = 0.09 M, [Pd(O<sub>2</sub>CCF<sub>3</sub>)<sub>2</sub>] = 0.11 M, CH<sub>3</sub>SO<sub>3</sub>H (1 equiv). b) [**6a**] = 0.09 M, [Pd(O<sub>2</sub>CCF<sub>3</sub>)<sub>2</sub>] = 0.10 M, CH<sub>3</sub>SO<sub>3</sub>H (3 equiv). c) [**6a**] = 0.08 M, [Pd(O<sub>2</sub>CCF<sub>3</sub>)<sub>2</sub>] = 0.10 M, CH<sub>3</sub>SO<sub>3</sub>H (11 equiv).

**Table S18** Data Presented in **Figure S5** from  $^1\text{H}$  NMR Measurements Conducted with 1 Equivalent  $\text{CH}_3\text{SO}_3\text{H}$

| Time (h) | [7a] (M) | Time (h) | [7a] (M) |
|----------|----------|----------|----------|
| 0        | 0.078    | 24       | 0.073    |
| 1        | 0.077    | 48       | 0.074    |
| 8        | 0.077    | 117.5    | 0.062    |

**Table S19** Data Presented in **Figure S5** from  $^1\text{H}$  NMR Measurements Conducted with 3 Equivalents  $\text{CH}_3\text{SO}_3\text{H}$

| Time (h) | [7a] (M) | Time (h) | [7a] (M) |
|----------|----------|----------|----------|
| 0        | 0.076    | 28       | 0.058    |
| 1        | 0.077    | 46       | 0.045    |
| 7        | 0.073    | 74       | 0.032    |
| 24       | 0.062    | 95       | 0.026    |

**Table S20** Data Presented in **Figure S5** from  $^1\text{H}$  NMR Measurements Conducted with 11 Equivalents  $\text{CH}_3\text{SO}_3\text{H}$

| Time (h) | [7a] (M) | Time (h) | [7a] (M) |
|----------|----------|----------|----------|
| 0        | 0.076    | 28       | 0.020    |
| 1        | 0.074    | 46       | 0.008    |
| 7        | 0.060    | 74       | 0.000    |
| 24       | 0.027    |          |          |

**Table S21** Rate Data from Monitoring Acid Effect on Protodepalladation

| Acid (equiv) | [Acid] | k ( $\text{s}^{-1}$ ) |
|--------------|--------|-----------------------|
| 1.0          | 0.088  | $5.3 \times 10^{-7}$  |
| 3.0          | 0.26   | $3.3 \times 10^{-6}$  |
| 11           | 0.91   | $1.3 \times 10^{-5}$  |

### GC Monitoring of the Effect of Solvent on Protodepalladation (Figure 7)

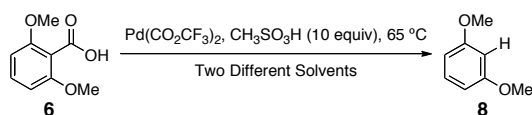

To a solution of **6a** (60 mg, 0.33 mmol) in the appropriate solvent (3.0 mL), was added palladium(II) trifluoroacetate (130 mg, 0.40 mmol) and biphenyl (51 mg, 0.33 mmol). To this solution was added  $\text{CH}_3\text{SO}_3\text{H}$  (210  $\mu\text{L}$ , 3.3 mmol). The reaction mixture was heated at 65  $^\circ\text{C}$  and at regular intervals aliquots ( $\sim 100 \mu\text{L}$ ) were removed. To each aliquot was added 1 M HCl and EtOAc. The solution was then shaken and the organic phase was filtered through  $\text{SiO}_2$  (10% MeOH/ $\text{CH}_2\text{Cl}_2$ ). The samples were then analyzed by gas chromatography (GC) using the conditions described in the general considerations and the final data is shown in **Table S22** and **Table S23**.

**Table S22** Data Presented in **Figure 7** from GC Measurements

| Time (h) | [ <b>7a</b> ] (M) | Time (h) | [ <b>7a</b> ] (M) | Time (h) | [ <b>7a</b> ] (M) |
|----------|-------------------|----------|-------------------|----------|-------------------|
| 0.00     | 0.102             | 0.83     | 0.091             | 1.67     | 0.080             |
| 0.17     | 0.101             | 1.00     | 0.089             | 1.83     | 0.070             |
| 0.33     | 0.099             | 1.17     | 0.086             | 2.00     | 0.074             |
| 0.50     | 0.097             | 1.33     | 0.083             | 24.00    | 0.028             |
| 0.67     | 0.094             | 1.50     | 0.082             |          |                   |

**Table S23** Data Presented in **Figure 7** from GC Measurements

| Time (h) | [ <b>7a</b> ] (M) | Time (h) | [ <b>7a</b> ] (M) | Time (h) | [ <b>7a</b> ] (M) |
|----------|-------------------|----------|-------------------|----------|-------------------|
| 0.00     | 0.102             | 0.83     | 0.028             | 1.67     | 0.010             |
| 0.17     | 0.075             | 1.00     | 0.024             | 1.83     | 0.011             |
| 0.33     | 0.064             | 1.17     | 0.014             | 2.00     | 0.011             |
| 0.50     | 0.055             | 1.33     | 0.014             | 24.00    | 0.019             |
| 0.67     | 0.039             | 1.50     | 0.011             |          |                   |



### Protodepalladation Eyring Analysis (Figure 8).

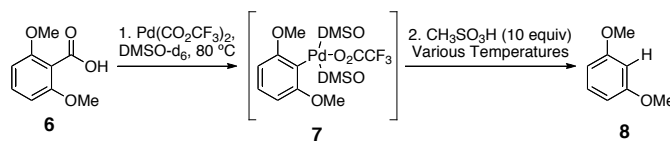

To a solution of 2,6-dimethoxybenzoic acid, **6a**, (12 mg, 0.066 mmol) in DMSO- $d_6$  (0.75 mL) was added palladium(II) trifluoroacetate (26 mg, 0.079 mmol). The mixture was heated at 80 °C for 1 h, cooled to room temperature, and a  $^1\text{H}$  NMR spectrum was taken. Methanesulfonic acid (43  $\mu\text{L}$ , 0.66 mmol) was added and the mixture was heated to 50 °C.  $^1\text{H}$  NMR spectra were then taken periodically throughout the course of the reaction. Three more experiments were conducted in the same manner at different temperatures (70, 90, and 110 °C) and then all four experiments were compared. Ratios of **6a:7a:8a** were determined by comparison of  $^1\text{H}$  NMR integrations and the final data is presented in **Table S24**, **Table S25**, **Table S26**, and **Table S27**. The rate data is shown in **Table S28**.

**Table S24** Data Presented in **Figure 8** from  $^1\text{H}$  NMR Measurements at 50 °C

| Time (h) | [ <b>7a</b> ] (M) | Time (h) | [ <b>7a</b> ] (M) |
|----------|-------------------|----------|-------------------|
| 0.00     | 0.076             | 25.50    | 0.054             |
| 1.00     | 0.076             | 33.50    | 0.051             |
| 3.00     | 0.075             | 52.00    | 0.040             |
| 7.50     | 0.071             |          |                   |

**Table S25** Data Presented in **Figure 8** from  $^1\text{H}$  NMR Measurements at 70 °C

| Time (h) | [ <b>7a</b> ] (M) | Time (h) | [ <b>7a</b> ] (M) |
|----------|-------------------|----------|-------------------|
| 0        | 0.079             | 9        | 0.039             |
| 1        | 0.070             | 16       | 0.024             |
| 3        | 0.061             | 23.5     | 0.009             |
| 6        | 0.048             |          |                   |

**Table S26** Data Presented in **Figure 8** from  $^1\text{H}$  NMR Measurements at 90 °C

| Time (h) | [7a] (M) | Time (h) | [7a] (M) | Time (h) | [7a] (M) |
|----------|----------|----------|----------|----------|----------|
| 0.02     | 0.079    | 0.13     | 0.071    | 0.59     | 0.037    |
| 0.03     | 0.079    | 0.15     | 0.070    | 0.77     | 0.030    |
| 0.05     | 0.077    | 0.17     | 0.069    | 1.00     | 0.022    |
| 0.07     | 0.077    | 0.22     | 0.064    | 1.28     | 0.016    |
| 0.08     | 0.076    | 0.27     | 0.060    | 1.53     | 0.012    |
| 0.10     | 0.075    | 0.31     | 0.054    |          |          |
| 0.12     | 0.074    | 0.43     | 0.046    |          |          |

**Table S27** Data Presented in **Figure 8** from  $^1\text{H}$  NMR Measurements at 110 °C

| Time (h) | [7a] (M) | Time (h) | [7a] (M) | Time (h) | [7a] (M) |
|----------|----------|----------|----------|----------|----------|
| 0.00     | 0.082    | 0.09     | 0.054    | 0.20     | 0.026    |
| 0.01     | 0.082    | 0.11     | 0.048    | 0.22     | 0.022    |
| 0.03     | 0.081    | 0.13     | 0.043    | 0.23     | 0.021    |
| 0.04     | 0.075    | 0.14     | 0.038    | 0.25     | 0.018    |
| 0.06     | 0.069    | 0.16     | 0.033    | 0.30     | 0.013    |
| 0.08     | 0.061    | 0.18     | 0.030    | 0.48     | 0.000    |

**Table S28** Protonation Rates of **7a** to **8a** at Different Temperatures<sup>a</sup>

<sup>a</sup> Compound **6a** was mixed with  $\text{Pd}(\text{O}_2\text{CCF}_3)_2$  in 0.75 mL  $\text{DMSO-d}_6$  and heated to 80 °C for 1 h. After cooling, a  $^1\text{H}$  NMR spectrum was taken,  $\text{CH}_3\text{SO}_3\text{H}$  was added, and  $^1\text{H}$  NMR monitoring was continued at the indicated temperature. Reaction conditions: initial concentration [**6a**] = 0.08 M and  $[\text{Pd}(\text{O}_2\text{CCF}_3)_2]$  = 0.10 M, 10 equiv  $\text{CH}_3\text{SO}_3\text{H}$ , 0.75 mL  $\text{DMSO-d}_6$

**GC Monitoring of the Effect of Acid Concentration on Decarboxylation (Figure 9)**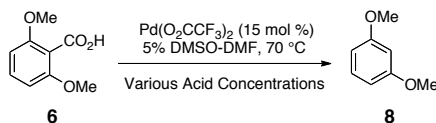

To a solution of **6a** (60 mg, 0.33 mmol) in 5% DMSO-DMF (2.8 mL) was added palladium(II) trifluoroacetate (16 mg, 0.049 mmol) and biphenyl (51 mg, 0.33 mmol). To this solution was added  $\text{CF}_3\text{CO}_2\text{H}$  (250  $\mu\text{L}$ , 3.3 mmol). The reaction mixture was

heated to 70 °C and at regular intervals aliquots (~100  $\mu$ L) were removed. To each aliquot was added 1 M HCl and EtOAc. The solution was then shaken and the organic phase was filtered through SiO<sub>2</sub> (10% MeOH/CH<sub>2</sub>Cl<sub>2</sub>). The samples were then analyzed by gas chromatography (GC) using the conditions described in the general considerations. The same experiment was also conducted at various concentrations of CF<sub>3</sub>CO<sub>2</sub>H and then all five experiments were compared. The data presented in **Table S29**, **Table S30**, **Table S31**, **Table S32**, and **Table S33** represents an average of three trials conducted at each concentration.

**Table S29** Data presented in **Figure 9** from GC measurements conducted with 0.5 equivalents of CF<sub>3</sub>CO<sub>2</sub>H with respect to **6a**

| Time (h) | [ <b>8a</b> ] (M) |
|----------|-------------------|
| 2        | 0.008             |
| 6        | 0.021             |
| 24       | 0.063             |
| 30       | 0.070             |

**Table S30** Data presented in **Figure 9** from GC measurements conducted with 1.0 equivalents of CF<sub>3</sub>CO<sub>2</sub>H with respect to **6a**

| Time (h) | [ <b>8a</b> ] (M) |
|----------|-------------------|
| 2        | 0.011             |
| 6        | 0.031             |
| 24       | 0.076             |
| 30       | 0.077             |

**Table S31** Data presented in **Figure 9** from GC measurements conducted with 2.0 equivalents of CF<sub>3</sub>CO<sub>2</sub>H with respect to **6a**

| Time (h) | [ <b>8a</b> ] (M) |
|----------|-------------------|
| 2        | 0.015             |
| 6        | 0.041             |
| 10       | 0.058             |
| 24       | 0.082             |

|    |       |
|----|-------|
| 30 | 0.083 |
|----|-------|

**Table S32** Data presented in **Figure 9** from GC measurements conducted with 10 equivalents of CF<sub>3</sub>CO<sub>2</sub>H with respect to **6a**

| Time (h) | [ <b>8a</b> ] (M) |
|----------|-------------------|
| 2        | 0.022             |
| 6        | 0.055             |
| 24       | 0.087             |
| 30       | 0.088             |

**Table S33** Data presented in **Figure 9** from GC measurements conducted with 20 equivalents of CF<sub>3</sub>CO<sub>2</sub>H with respect to **6a**

| Time (h) | [ <b>8a</b> ] (M) |
|----------|-------------------|
| 2        | 0.013             |
| 6        | 0.030             |
| 24       | 0.073             |
| 30       | 0.077             |

**Table S34** Rate Data from Monitoring Acid Concentration on Decarboxylation

| Acid (equiv) | [Acid] | k (s <sup>-1</sup> )   |
|--------------|--------|------------------------|
| 0.5          | 0.071  | 9.6 x 10 <sup>-6</sup> |
| 1.0          | 0.125  | 1.2 x 10 <sup>-5</sup> |
| 2.0          | 0.232  | 1.4 x 10 <sup>-5</sup> |
| 10           | 1.087  | 1.5 x 10 <sup>-5</sup> |
| 20           | 2.114  | 1.6 x 10 <sup>-5</sup> |

**GC Reaction Monitoring of Acids in the Decarboxylation Reaction (Table 2)**

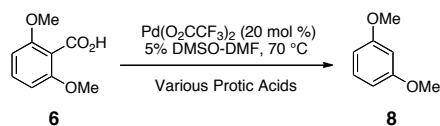

To a solution of **6a** (60 mg, 0.33 mmol) in 5% DMSO-DMF (3.0 mL), was added palladium(II) trifluoroacetate (22 mg, 0.066 mmol) and biphenyl (51 mg, 0.33 mmol). To

this solution was added the appropriate protic acid (10 equivalents) as specified in **Table 2**. The mixture was heated to 70 °C and at regular intervals aliquots (~100  $\mu$ L) were removed. To each aliquot was added 1 M HCl and EtOAc. The solution was then shaken and the organic phase was filtered through SiO<sub>2</sub> (10% MeOH/CH<sub>2</sub>Cl<sub>2</sub>). The samples were then analyzed by gas chromatography (GC) using the conditions described in the general considerations. The results summarized in **Table 2** are depicted in **Figure S6**.

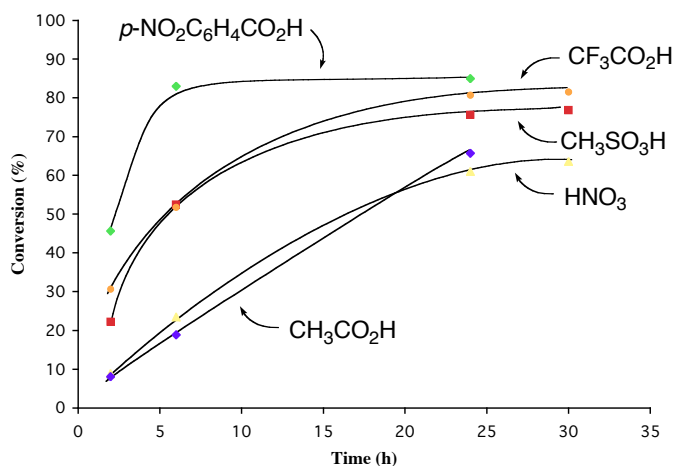

**Figure S6.** Conversion vs Time with Different Protic Acids.

### GC Monitoring of Palladium Order in the Decarboxylation Reaction (Figure 10)

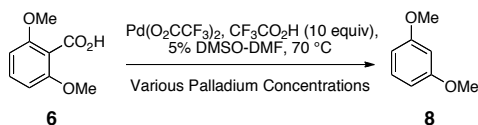

To a solution of **6a** (60 mg, 0.33 mmol) in 5% DMSO-DMF (3.0 mL), was added palladium(II) trifluoroacetate (22 mg, 0.066 mmol) and biphenyl (51 mg, 0.33 mmol). To this solution was added CF<sub>3</sub>CO<sub>2</sub>H (250  $\mu$ L, 3.3 mmol). The mixture was heated to 70 °C and at regular intervals aliquots (~100  $\mu$ L) were removed. To each aliquot was added 1 M HCl and EtOAc. The solution was then shaken and the organic phase was filtered through SiO<sub>2</sub> (10% MeOH/CH<sub>2</sub>Cl<sub>2</sub>). The samples were then analyzed by gas chromatography (GC) using the conditions described in the general considerations. The same experiment was also conducted with various amounts of Pd(O<sub>2</sub>CCF<sub>3</sub>)<sub>2</sub> and then all

four experiments were compared. The final data is presented in **Table S35**, **Table S36**, and **Table S37**.

**Table S35** Data presented in **Figure 10** from GC measurements conducted with 0.20 equivalents of Pd(O<sub>2</sub>CCF<sub>3</sub>)<sub>2</sub> with respect to **6a**

| Time (h) | [ <b>8a</b> ] (M) |
|----------|-------------------|
| 2        | 0.025             |
| 5        | 0.059             |
| 9        | 0.080             |
| 12       | 0.085             |
| 16       | 0.088             |
| 28       | 0.088             |

**Table S36** Data presented in **Figure 10** from GC measurements conducted with 0.15 equivalents of Pd(O<sub>2</sub>CCF<sub>3</sub>)<sub>2</sub> with respect to **6a**

| Time (h) | [ <b>8a</b> ] (M) |
|----------|-------------------|
| 2        | 0.025             |
| 5        | 0.052             |
| 9        | 0.069             |
| 12       | 0.074             |
| 16       | 0.077             |
| 24       | 0.079             |

**Table S37** Data presented in **Figure 10** from GC measurements conducted with 0.10 equivalents of Pd(O<sub>2</sub>CCF<sub>3</sub>)<sub>2</sub> with respect to **6a**

| Time (h) | [ <b>8a</b> ] (M) |
|----------|-------------------|
| 2        | 0.017             |
| 5        | 0.038             |
| 9        | 0.054             |
| 12       | 0.059             |
| 16       | 0.063             |
| 24       | 0.063             |

**Table S38** Rate Data from Monitoring Palladium Order in the Decarboxylation

| Pd(O <sub>2</sub> CCF <sub>3</sub> ) <sub>2</sub> (equiv) | [Pd(O <sub>2</sub> CCF <sub>3</sub> ) <sub>2</sub> ] | k (s <sup>-1</sup> )   |
|-----------------------------------------------------------|------------------------------------------------------|------------------------|
| 0.20                                                      | 0.020                                                | 5.1 x 10 <sup>-5</sup> |
| 0.15                                                      | 0.015                                                | 3.3 x 10 <sup>-5</sup> |
| 0.10                                                      | 0.010                                                | 2.2 x 10 <sup>-5</sup> |

**GC Reaction Monitoring of Solvents in the Decarboxylation Reaction (Table 3)**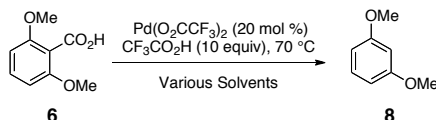

To a solution of **6a** (60 mg, 0.33 mmol) in the appropriate solvent (3.0 mL) as specified in **Table 3**, was added palladium(II) trifluoroacetate (22 mg, 0.066 mmol) and biphenyl (51 mg, 0.33 mmol). To this solution was added CF<sub>3</sub>CO<sub>2</sub>H (250 μL, 3.3 mmol). The mixture was heated to 70 °C and at regular intervals aliquots (~100 μL) were removed. To each aliquot was added 1 M HCl and EtOAc. The solution was then shaken and the organic phase was filtered through SiO<sub>2</sub> (10% MeOH/CH<sub>2</sub>Cl<sub>2</sub>). The samples were then analyzed by gas chromatography (GC) using the conditions described in the general considerations.

### <sup>1</sup>H NMR Monitoring of Pd(O<sub>2</sub>CCH<sub>3</sub>)<sub>2</sub> vs Pd(O<sub>2</sub>CCF<sub>3</sub>)<sub>2</sub> in the Decarboxylation

#### Reaction

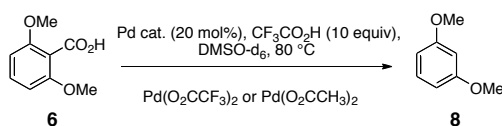

To a solution of 2,6-dimethoxybenzoic acid, **6a**, (12 mg, 0.066 mmol) in DMSO-d<sub>6</sub> (0.75 mL) was added palladium(II) trifluoroacetate (4.4 mg, 0.013 mmol) and CH<sub>3</sub>SO<sub>3</sub>H (43 μL, 0.66 mmol). The mixture was heated to 80 °C and <sup>1</sup>H NMR spectra were taken periodically throughout the course of the reaction. The same experiment was conducted with palladium(II) acetate. Ratios of **6a:7a:8a** were determined by comparison of <sup>1</sup>H NMR integrations and the final data is presented in **Table S39** and **Table S40** and depicted in **Figure S7**.

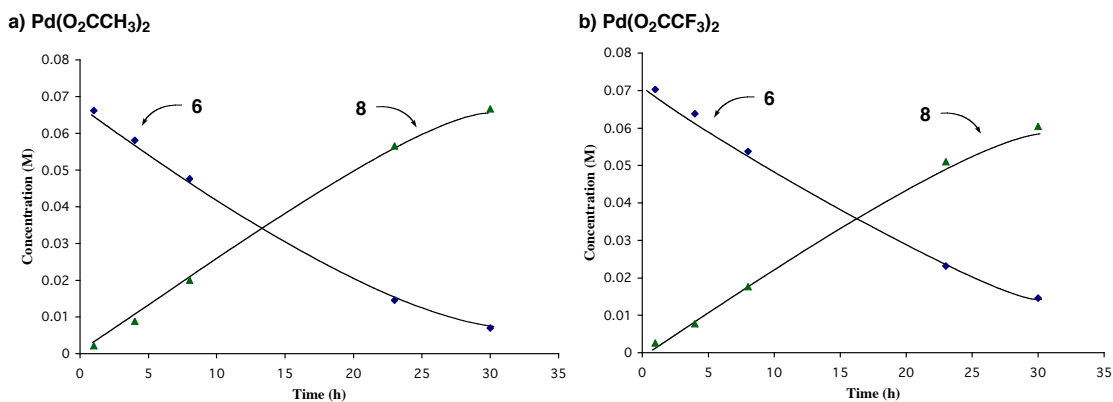

**Figure S7.** Comparison of Pd(OAc)<sub>2</sub> and Pd(O<sub>2</sub>CCF<sub>3</sub>)<sub>2</sub> in the decarboxylation of **6a** as monitored by <sup>1</sup>H NMR spectroscopy.

**Table S39** Data presented in **Figure S7a** from <sup>1</sup>H NMR measurements conducted with Pd(O<sub>2</sub>CCH<sub>3</sub>)<sub>2</sub>

| Time (h) | [ <b>6a</b> ] (M) |
|----------|-------------------|
| 0        | 0.083             |
| 1        | 0.066             |
| 4        | 0.058             |
| 8        | 0.048             |
| 23       | 0.015             |
| 30       | 0.007             |

**Table S40** Data presented in **Figure S7b** from <sup>1</sup>H NMR measurements conducted with Pd(O<sub>2</sub>CCF<sub>3</sub>)<sub>2</sub>

| Time (h) | [ <b>6a</b> ] (M) |
|----------|-------------------|
| 0        | 0.083             |
| 1        | 0.070             |
| 4        | 0.064             |
| 8        | 0.054             |
| 23       | 0.023             |
| 30       | 0.015             |



## GC Reaction Monitoring of Ligands in the Decarboxylation Reaction (Table 4)

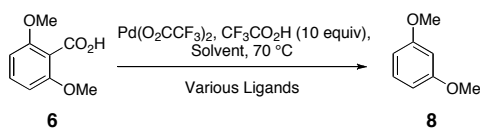

To a solution of **6a** (60 mg, 0.33 mmol) in the appropriate solvent (3.0 mL) specified in **Table 4**, was added palladium(II) trifluoroacetate (22 mg, 0.066 mmol), biphenyl (51 mg, 0.33 mmol), and CF<sub>3</sub>CO<sub>2</sub>H (250 μL, 3.3 mmol). To each solution was added the appropriate ligand as specified in **Table 4**. The mixture was heated to 70 °C and at regular intervals aliquots (~100 μL) were removed. To this aliquot was added 1 M HCl and EtOAc. The solution was then shaken and the organic phase was filtered through SiO<sub>2</sub> (10% MeOH/CH<sub>2</sub>Cl<sub>2</sub>). The samples were then analyzed by gas chromatography (GC) using the conditions described in the general considerations.

## <sup>1</sup>H NMR Hammett Study of Aromatic Decarboxylation Reaction (Figure 11)

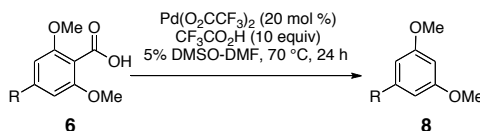

To a solution of 2,6-dimethoxy-4-methylbenzoic acid (**6b**, R = Me) (13 mg, 0.066 mmol) in DMSO-d<sub>6</sub> (0.75 ml) was added palladium(II) trifluoroacetate (4.4 mg, 0.013 mmol) and CH<sub>3</sub>SO<sub>3</sub>H (43 μL, 0.66 mmol). The mixture was then warmed to 70 °C and spectra were taken periodically throughout the course of the reaction. Experiments with **6a,c-d** (R = H, Cl, and OMe) were conducted in the same manner and all four experiments were used to construct **Figure 11**. Ratios of the carboxylic acid starting materials, aryl palladium intermediates, and protodecarboxylated products were determined by comparison of <sup>1</sup>H NMR integrations and the final data is presented in **Table S41** (**6a**, R = H), **Table S42** (**6b**, R = Me), **Table S43** (**6c**, R = Cl), and **Table S44** (**6d**, R = OMe). The relevant <sup>1</sup>H NMR chemical shifts are listed in **Table S4**, **Table S11**, **Table S13**, and **Table S16**.

**Table S41** Data presented in **Figure 11** from  $^1\text{H}$  NMR measurements of the decarboxylation of **6a** (R = H) at 70 °C

| Time (h) | [ <b>6a</b> , R = H] (M) | Time | [ <b>6a</b> , R = H] (M) |
|----------|--------------------------|------|--------------------------|
| 0        | 0.083                    | 33.5 | 0.041                    |
| 1        | 0.078                    | 48   | 0.029                    |
| 6        | 0.070                    | 60   | 0.021                    |
| 24       | 0.050                    | 81   | 0.010                    |

**Table S42** Data presented in **Figure 11** from  $^1\text{H}$  NMR measurements of the decarboxylation of **6b** (R = Me) at 70 °C

| Time (h) | [ <b>6b</b> , R = Me] (M) | Time (h) | [ <b>6b</b> , R = Me] (M) |
|----------|---------------------------|----------|---------------------------|
| 0        | 0.084                     | 4        | 0.043                     |
| 1        | 0.066                     | 5        | 0.038                     |
| 2        | 0.058                     | 8        | 0.021                     |
| 3        | 0.051                     |          |                           |

**Table S43** Data presented in **Figure 11** from  $^1\text{H}$  NMR measurements of the decarboxylation of **6c** (R = Cl) at 70 °C

| Time (h) | [ <b>6c</b> , R = Cl] (M) | Time  | [ <b>6c</b> , R = Cl] (M) |
|----------|---------------------------|-------|---------------------------|
| 0        | 0.083                     | 60    | 0.045                     |
| 1        | 0.081                     | 72    | 0.040                     |
| 7        | 0.072                     | 97    | 0.032                     |
| 24       | 0.060                     | 120.5 | 0.025                     |
| 33.5     | 0.056                     | 168   | 0.014                     |
| 48       | 0.049                     |       |                           |

**Table S44** Data presented in **Figure 11** from  $^1\text{H}$  NMR measurements of the decarboxylation of **6d** (R = OMe) at 70 °C

| Time (min) | [ <b>6d</b> , R = OMe] (M) | Time | [ <b>6d</b> , R = OMe] (M) |
|------------|----------------------------|------|----------------------------|
| 4.00       | 0.066                      | 8.25 | 0.005                      |
| 5.25       | 0.041                      | 9.00 | 0.003                      |
| 6.50       | 0.025                      | 9.75 | 0.002                      |
| 7.25       | 0.013                      |      |                            |

**Table S45** Rate Data from Hammett Study of the Decarboxylation Reaction

| Substrate                                                                                              | $\sigma^+$ values | k (s <sup>-1</sup> )   |
|--------------------------------------------------------------------------------------------------------|-------------------|------------------------|
| 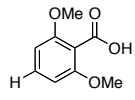<br><b>6, R = H</b>   | 0.00              | 6.8 x 10 <sup>-6</sup> |
| <br><b>6, R = Me</b>  | -0.31             | 4.6 x 10 <sup>-5</sup> |
| <br><b>6, R = Cl</b>  | 0.11              | 2.8 x 10 <sup>-6</sup> |
| <br><b>6, R = OMe</b> | -0.78             | 0.011                  |

### References

- 1) Becke, A. D. *J. Chem. Phys.* **1993** 98, 5648-5652.
- 2) Lee, C.; Yang, W.; Parr, R. G. *Phys. Rev. B* **1988**, 37, 785.
- 3) Vosko, S. H.; Wilk, L.; Nusair, M. *Can. J. Phys.* **1980**, 58, 1200.
- 4) Perdew, J. P., In *Electronic Structure of Solids '91P*. Ziesche, H. Eschig, ed.; Akademie Verlag Berlin, 1991 p11.
- 5) Perdew, J. P.; Wang, Y. *Phys. Rev. B: Condens. Matter*, **1992**, 45, 13244.
- 6) Perdew, J. P.; Berke, K.; Wang, Y. *Phys. Rev. B: Condens. Matter*, **1996**, 54, 16533.
- 7) Barone, V.; Cossi, M. *J. Phys. Chem. A* **1998**, 102, 1995.

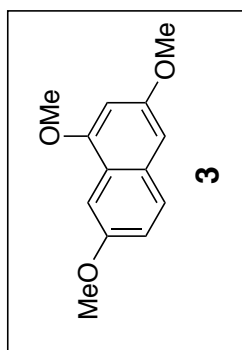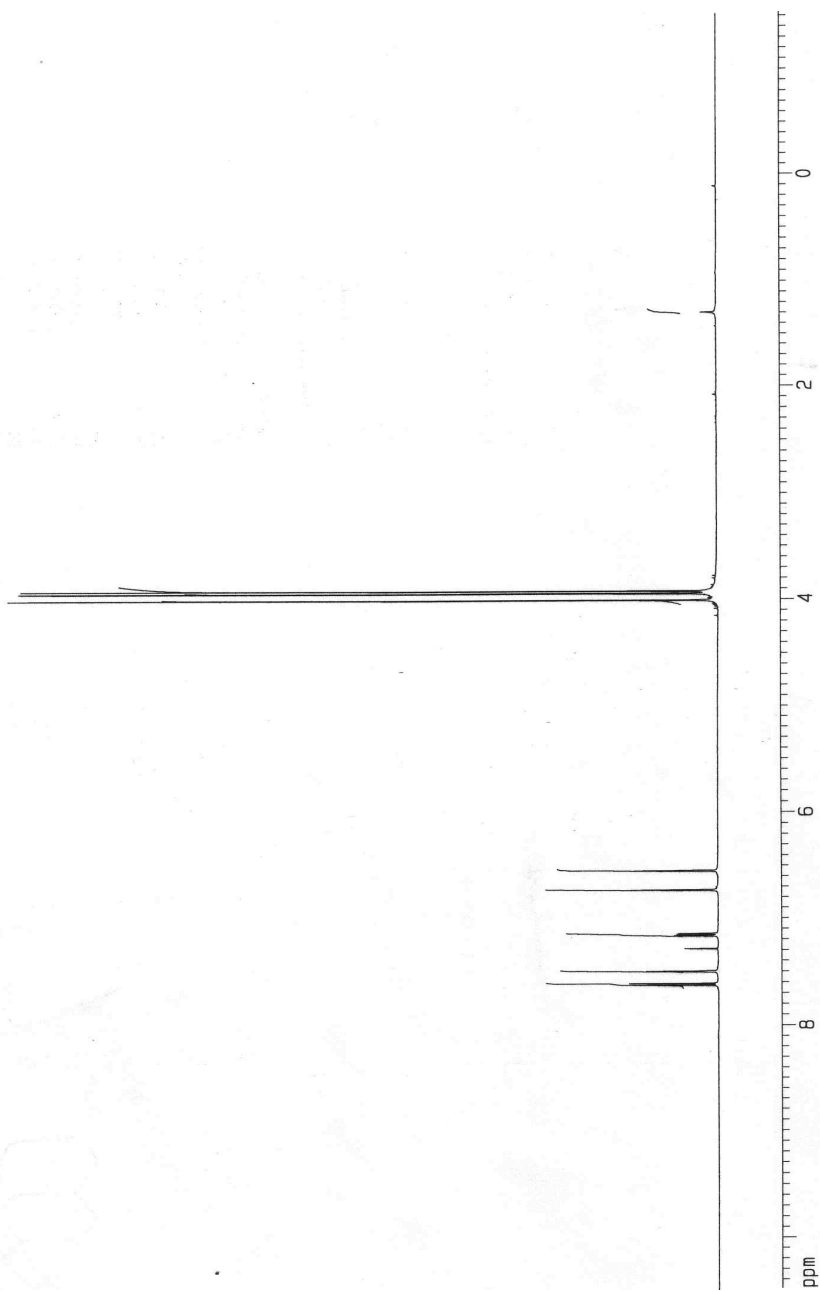

**Scheme 1.** 500 MHz <sup>1</sup>H NMR Spectrum of Compound **3** in CDCl<sub>3</sub>

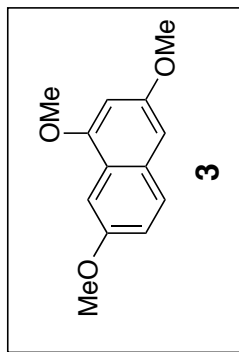

S29

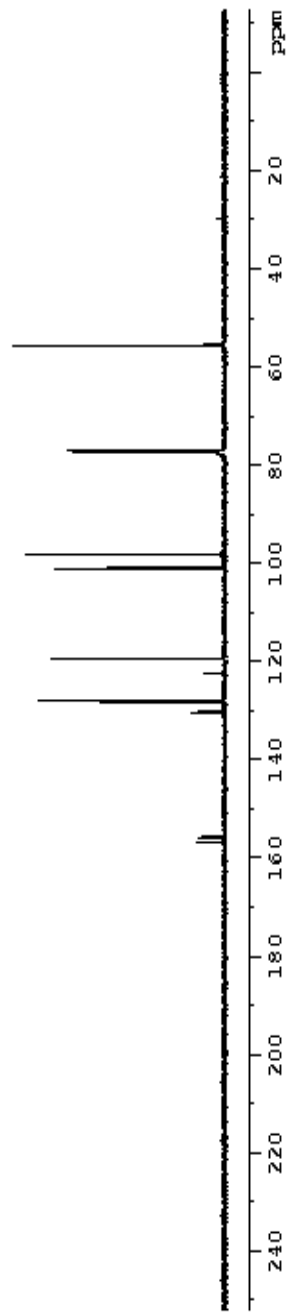

**Scheme 1.** 125 MHz  $^{13}\text{C}$  NMR Spectrum of Compound **3** in  $\text{CDCl}_3$

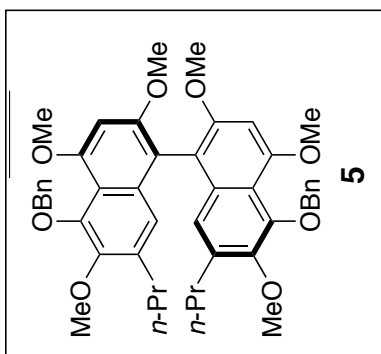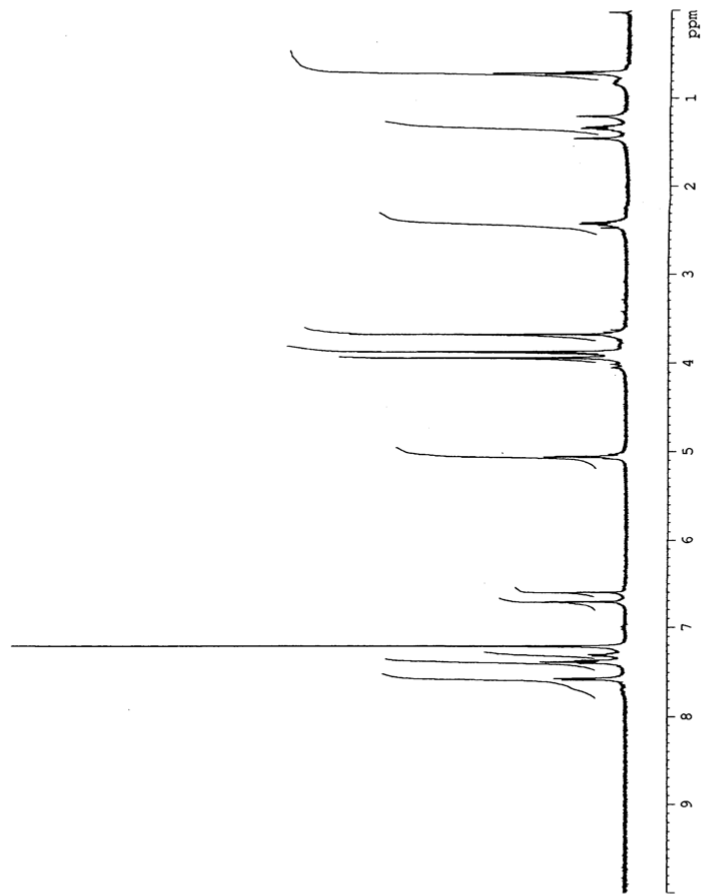

**Scheme 2.** 500 MHz <sup>1</sup>H NMR Spectrum of Compound **5** in CDCl<sub>3</sub>

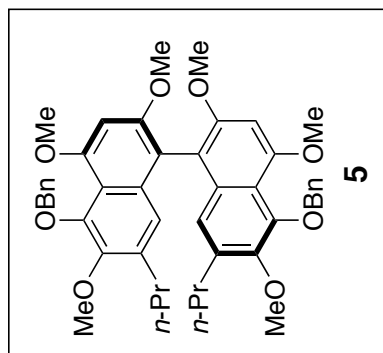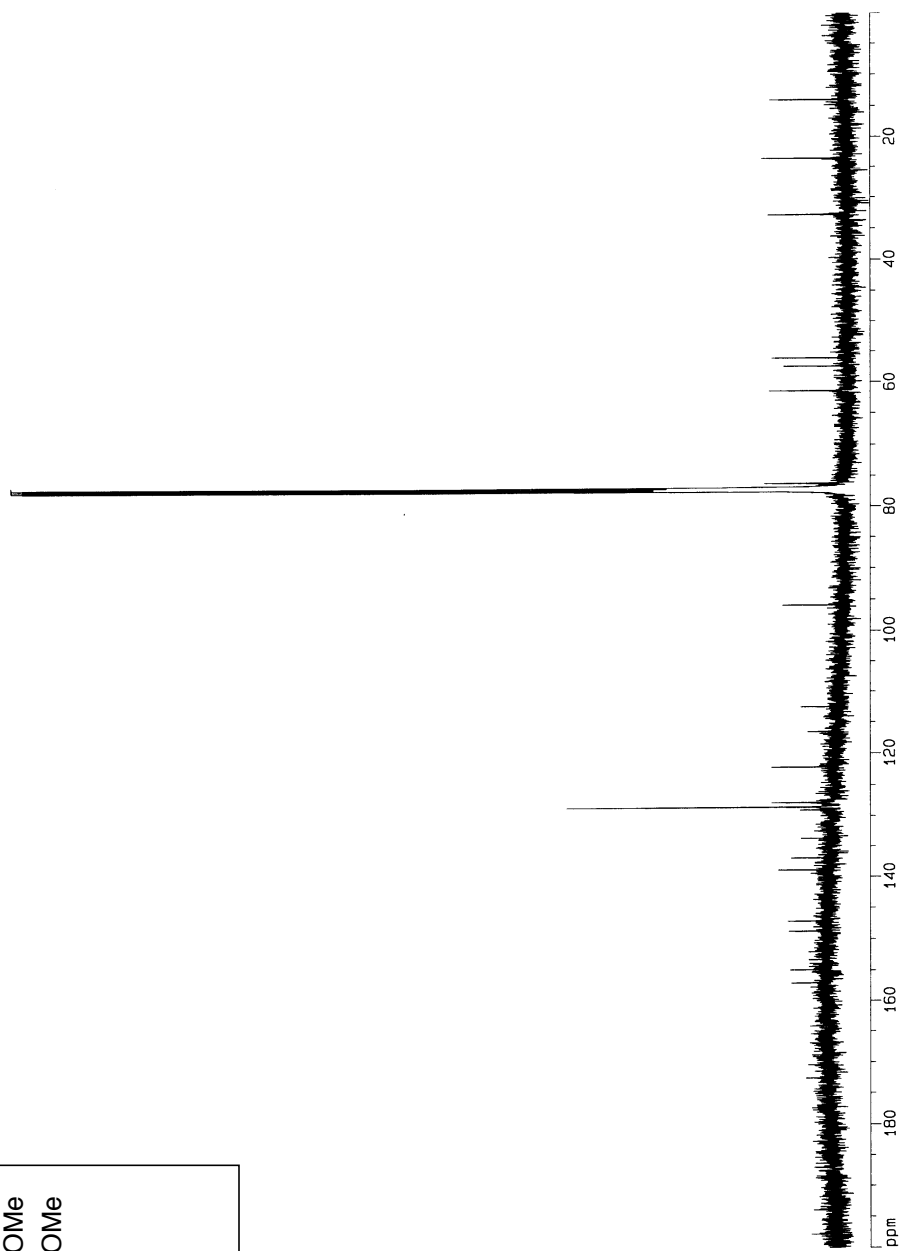

**Scheme 2.** 125 MHz  $^{13}\text{C}$  NMR Spectrum of Compound **5** in  $\text{CDCl}_3$

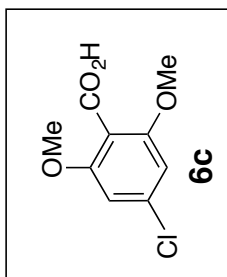

S32

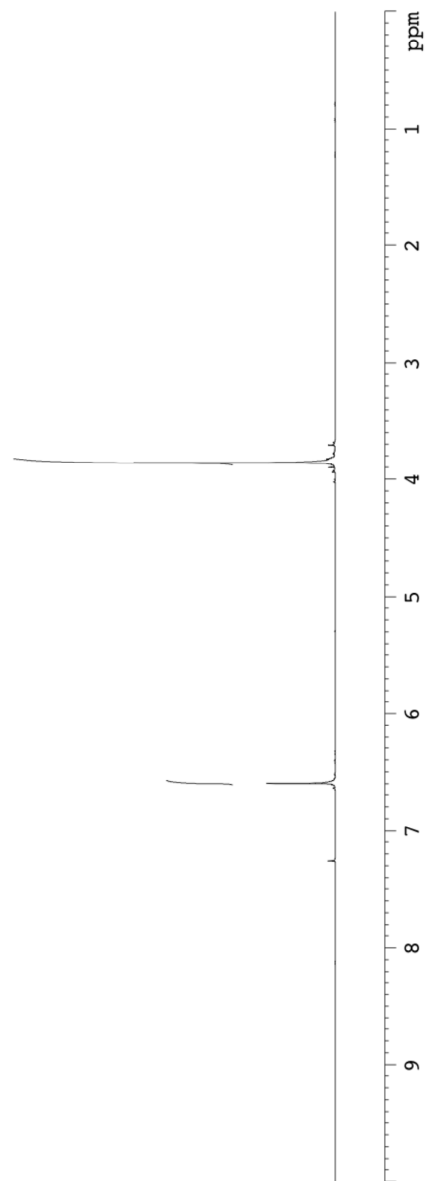

**Figure 4.** 500 MHz <sup>1</sup>H NMR Spectrum of Compound **6c** in CDCl<sub>3</sub>



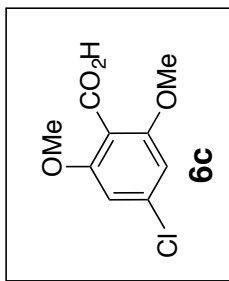

S33

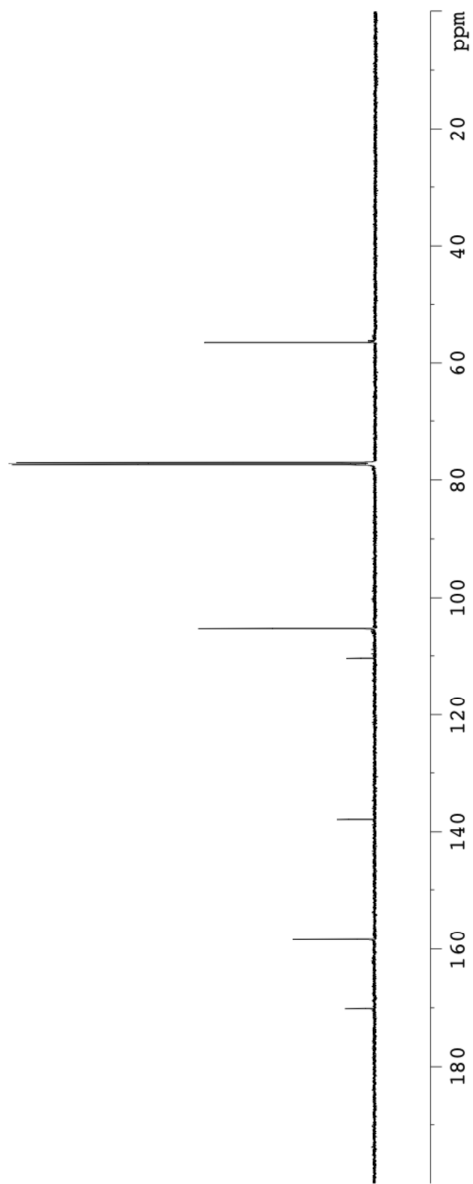

**Figure 4.** 125 MHz <sup>13</sup>C NMR Spectrum of Compound **6c** in CDCl<sub>3</sub>

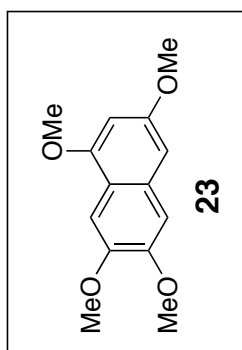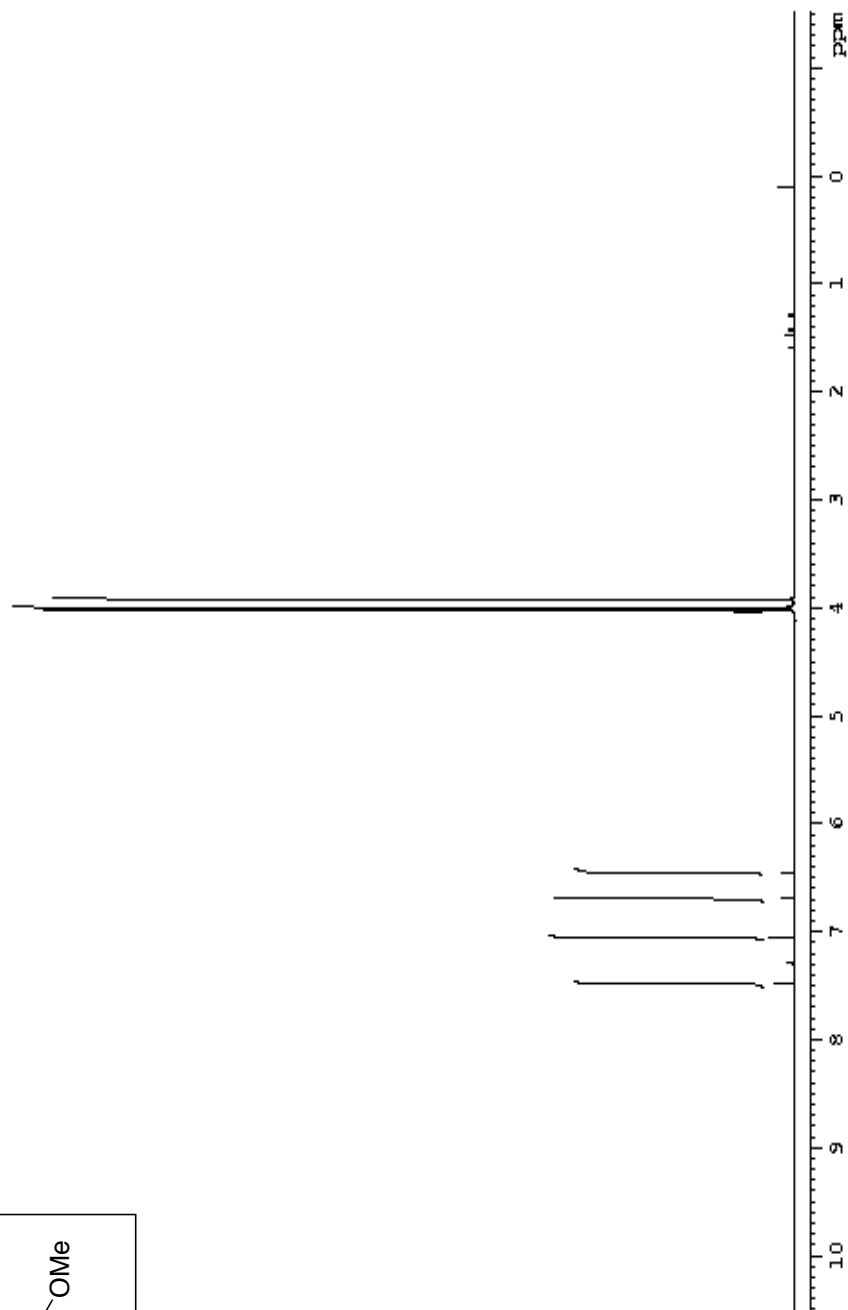

**Table 6.** 500 MHz <sup>1</sup>H NMR Spectrum of Compound **23** in CDCl<sub>3</sub>

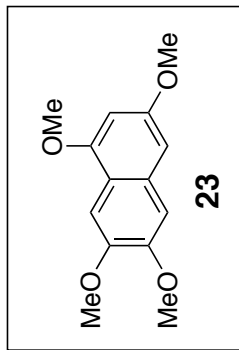

S35

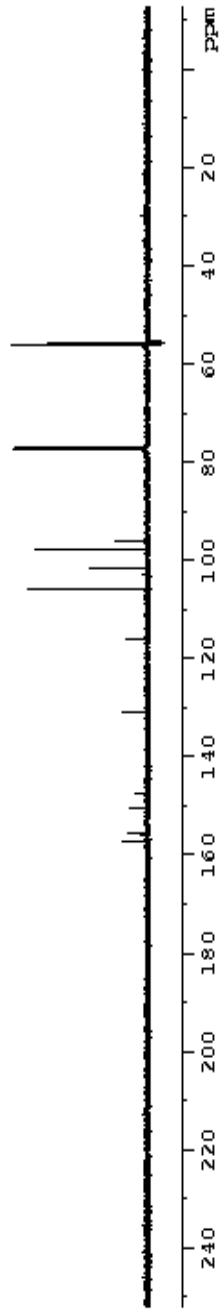

**Table 6.** 125 MHz  $^{13}\text{C}$  NMR Spectrum of Compound **23** in  $\text{CDCl}_3$

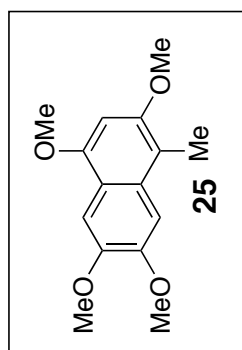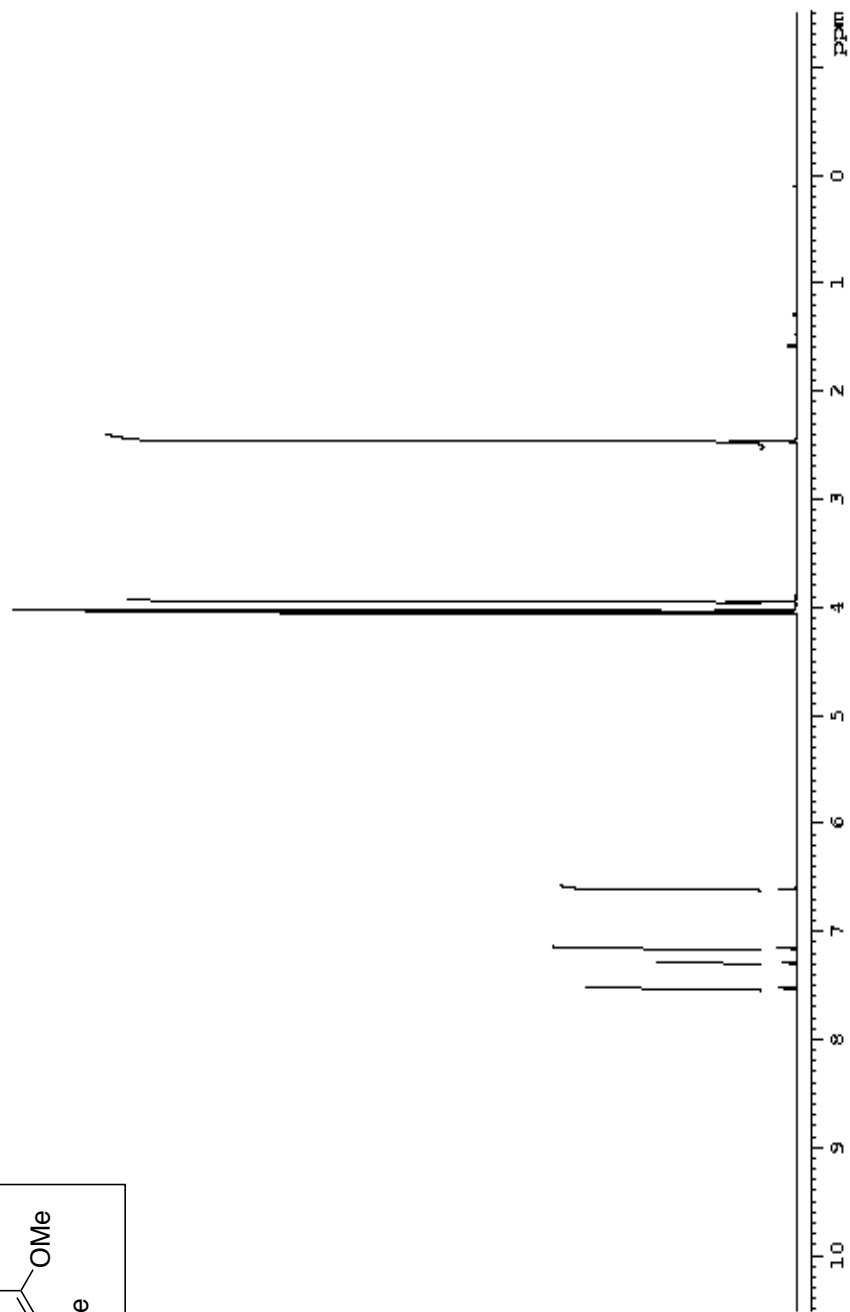

**Table 6.** 500 MHz <sup>1</sup>H NMR Spectrum of Compound **25** in CDCl<sub>3</sub>

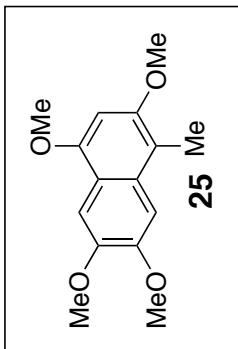

S37

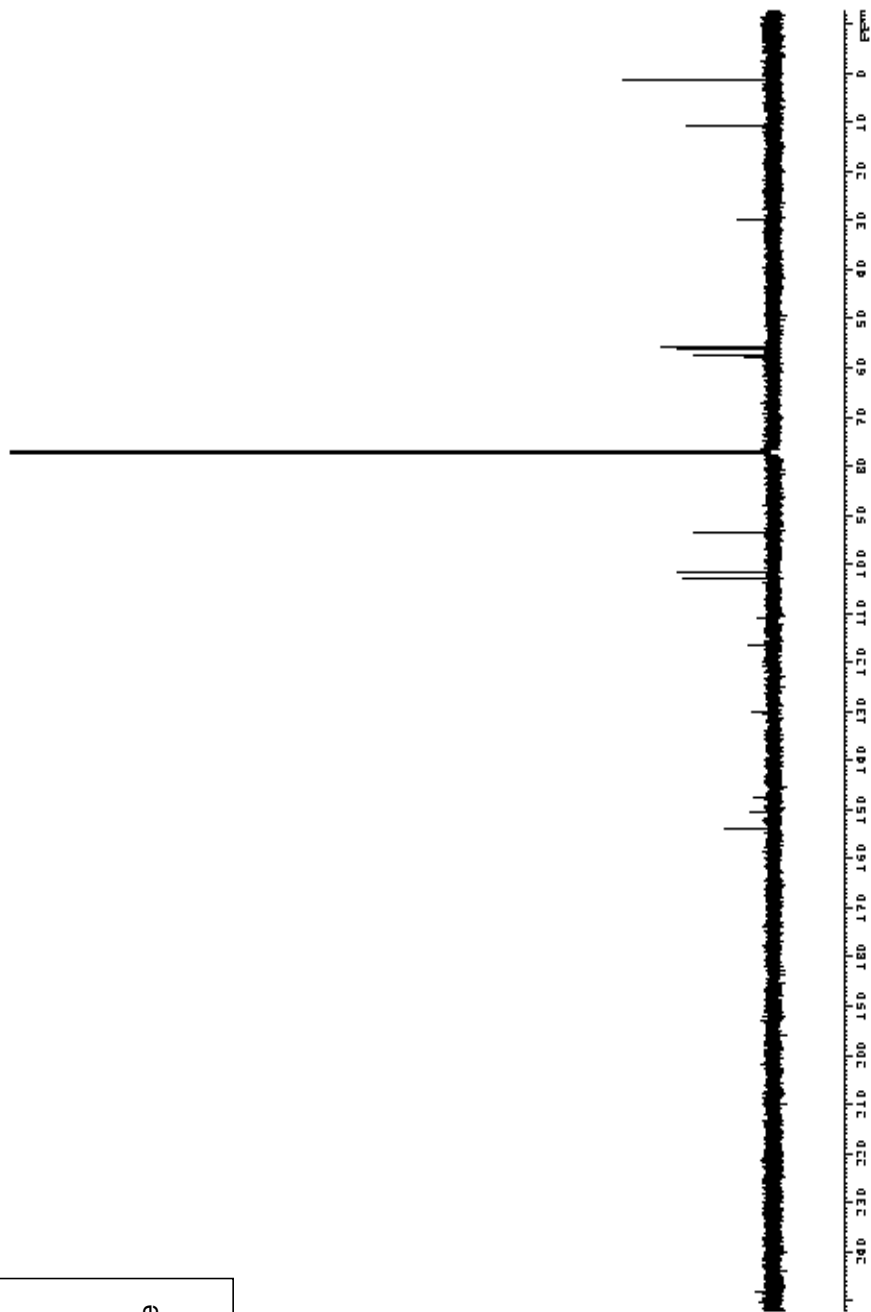

**Table 6.** 125 MHz  $^{13}\text{C}$  NMR Spectrum of Compound **25** in  $\text{CDCl}_3$

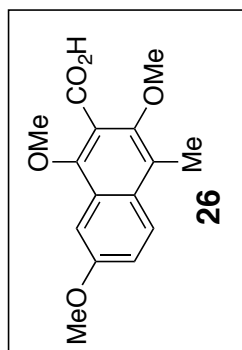

S38

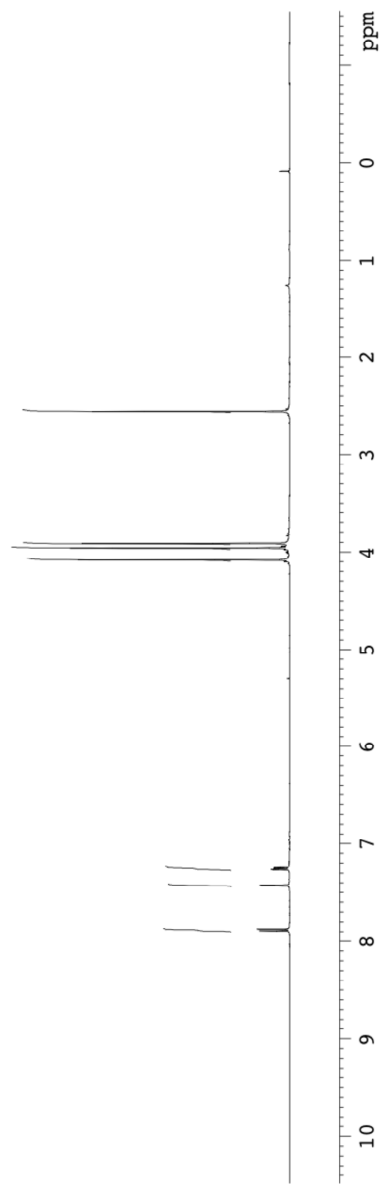

**Table 6.** 500 MHz <sup>1</sup>H NMR Spectrum of Compound **26** in CDCl<sub>3</sub>



S39

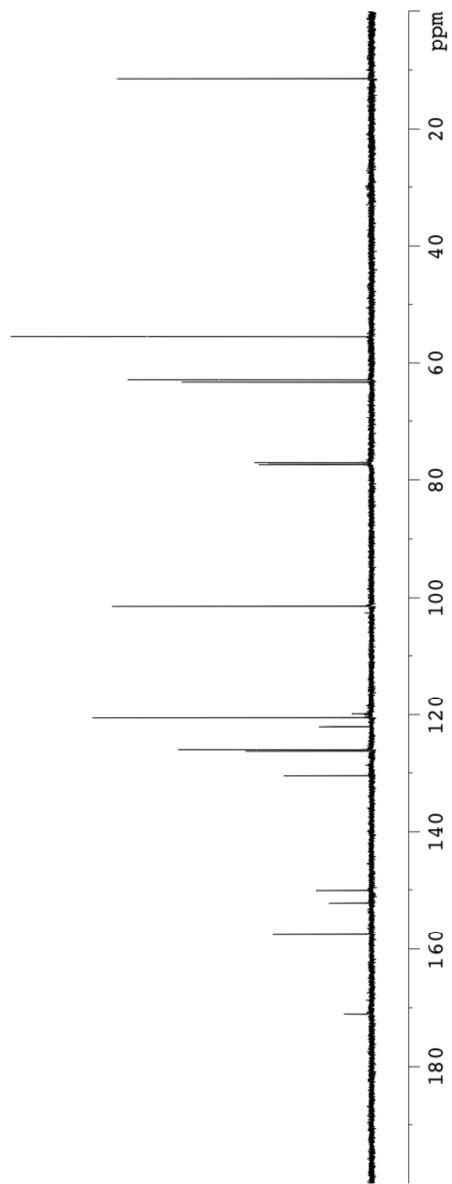

**Table 6.** 125 MHz <sup>13</sup>C NMR Spectrum of Compound **26** in CDCl<sub>3</sub>

## Coordinates and Energies for Figure 5 and Figure S4

B3LYP/6-31G(d) (SDD for Pd)  
in DCM (CPCM;UA0)

9

Zero-point correction= 0.362394 (Hartree/Particle)  
Thermal correction to Energy= 0.397673  
Thermal correction to Enthalpy= 0.398618  
Thermal correction to Gibbs Free Energy= 0.288912  
Sum of electronic and zero-point Energies= -2409.485318  
Sum of electronic and thermal Energies= -2409.450038  
Sum of electronic and thermal Enthalpies= -2409.449094  
Sum of electronic and thermal Free Energies= -2409.558799

|    |             |             |             |
|----|-------------|-------------|-------------|
| C  | 0.25383200  | 1.68488200  | 2.62751000  |
| C  | -0.09653500 | 1.47885700  | 3.97160300  |
| C  | 0.18194300  | 2.97835500  | 2.08798300  |
| C  | -0.50933100 | 2.55256900  | 4.77298900  |
| C  | -0.23248500 | 4.05920200  | 2.87855200  |
| C  | -0.57091000 | 3.82812100  | 4.21191900  |
| H  | -0.29391600 | 5.06073300  | 2.47128400  |
| H  | -0.89147400 | 4.66300800  | 4.82886100  |
| C  | 1.53786200  | -4.08767100 | -1.13659800 |
| O  | 0.52724900  | 3.08363700  | 0.76804400  |
| C  | 0.46423400  | 4.36709700  | 0.15154900  |
| H  | 1.14557700  | 5.07650200  | 0.63596400  |
| H  | 0.77405900  | 4.21486400  | -0.88314400 |
| H  | -0.55575100 | 4.76860700  | 0.17125700  |
| O  | 0.39345800  | -3.62368800 | -0.79105400 |
| C  | 1.37395900  | -5.41768400 | -1.92102300 |
| O  | 2.66500500  | -3.63401800 | -0.95215900 |
| Pd | 0.22958700  | -1.88203000 | 0.27426200  |
| O  | 1.94972300  | 0.34686200  | 1.59637600  |
| C  | 3.15191300  | -1.02538900 | -2.87471500 |
| H  | 2.49267100  | -0.59127200 | -3.63032900 |
| H  | 4.18407500  | -0.69440000 | -3.01891000 |
| H  | 3.10252500  | -2.11481000 | -2.88426800 |
| C  | 2.67778700  | 1.29272900  | -1.44091700 |
| H  | 2.26498500  | 1.73082100  | -0.53102200 |
| H  | 3.72461900  | 1.58424400  | -1.56397200 |
| H  | 2.08866600  | 1.57481600  | -2.31714300 |
| S  | 2.61018900  | -0.50651800 | -1.22222900 |
| O  | 1.05386400  | -0.80252700 | -1.27418900 |
| H  | -0.77809800 | 2.40495300  | 5.81162600  |
| O  | 0.00675500  | 0.18959100  | 4.41211100  |
| C  | -0.27733800 | -0.08510300 | 5.78117000  |
| H  | -1.31941900 | 0.15031400  | 6.02874000  |
| H  | -0.10693400 | -1.15468600 | 5.91076200  |
| H  | 0.39064100  | 0.47438700  | 6.44686000  |
| F  | 2.55571000  | -5.99875900 | -2.17701400 |
| F  | 0.75988100  | -5.19414100 | -3.10490700 |
| F  | 0.61952900  | -6.30220600 | -1.23322000 |
| C  | 0.74182500  | 0.52699400  | 1.78230800  |
| O  | -0.22389200 | -0.20310300 | 1.31169800  |
| S  | -2.08157900 | -3.41065100 | 1.93186800  |
| O  | -0.57654600 | -2.98942400 | 1.82562100  |
| C  | -2.54289200 | -4.21170600 | 0.36677900  |
| H  | -2.37334500 | -3.52571300 | -0.46571800 |
| H  | -1.91510400 | -5.09742000 | 0.25731300  |
| H  | -3.59605900 | -4.49714900 | 0.44162600  |
| C  | -3.07851800 | -1.89877700 | 1.78315300  |
| H  | -2.82832900 | -1.26320600 | 2.63390000  |
| H  | -2.84201600 | -1.39020200 | 0.84597400  |
| H  | -4.13194000 | -2.18939600 | 1.82402300  |

12

Zero-point correction= 0.280394 (Hartree/Particle)  
Thermal correction to Energy= 0.308611  
Thermal correction to Enthalpy= 0.309555  
Thermal correction to Gibbs Free Energy= 0.216563  
Sum of electronic and zero-point Energies= -1856.334929  
Sum of electronic and thermal Energies= -1856.306712  
Sum of electronic and thermal Enthalpies= -1856.305768  
Sum of electronic and thermal Free Energies= -1856.398760

|    |             |             |             |
|----|-------------|-------------|-------------|
| C  | -1.48624600 | -1.72789300 | 1.21130500  |
| C  | -2.71364900 | -2.35988900 | 0.95031500  |
| C  | -0.75824700 | -2.08133900 | 2.35942500  |
| C  | -3.19930200 | -3.35267900 | 1.81251200  |
| C  | -1.23504200 | -3.07191200 | 3.22839400  |
| C  | -2.45099300 | -3.69264800 | 2.93940400  |
| H  | -0.68174800 | -3.35342200 | 4.11568800  |
| H  | -2.82601400 | -4.45917500 | 3.61187900  |
| O  | 0.01132700  | -5.00312400 | -1.38864900 |
| C  | 0.41185700  | -1.39865400 | 2.54157200  |
| C  | 1.19333000  | -1.68857400 | 3.69851400  |
| H  | 1.53270000  | -2.73112900 | 3.69952100  |
| H  | 2.05754500  | -1.02523300 | 3.64627600  |
| H  | 0.63208800  | -1.48546000 | 4.61802000  |
| O  | 1.23826400  | -4.72222500 | -1.24743100 |
| O  | -0.40459900 | -6.46112000 | -1.63384500 |
| O  | -0.87771500 | -4.10977200 | -1.27976100 |
| Pd | 0.67227700  | -2.70634100 | -0.85182900 |
| O  | -0.15086300 | -0.90059700 | -0.64261200 |
| C  | 4.36066800  | -0.23338300 | 0.27548500  |
| H  | 4.95759700  | -0.62330300 | -0.55170900 |
| H  | 4.61017300  | 0.81001000  | 0.48506800  |
| H  | 4.50077400  | -0.83884600 | 1.17280800  |
| C  | 2.61229300  | 0.62203400  | -1.70627700 |
| H  | 1.60237900  | 0.55102500  | -2.11279200 |
| H  | 2.85332100  | 1.66374400  | -1.47720700 |
| H  | 3.34461400  | 0.18760000  | -2.39112500 |
| S  | 2.60171300  | -0.31708800 | -0.15284600 |
| O  | 2.50561300  | -1.83676300 | -0.60709600 |
| H  | -4.14069000 | -3.85132000 | 1.61826300  |
| O  | -3.35493500 | -1.94200500 | -0.17861100 |
| C  | -4.59425900 | -2.55652800 | -0.52296600 |
| H  | -5.34864800 | -2.39551200 | 0.25619100  |
| H  | -4.91745200 | -2.07414400 | -1.44626200 |
| H  | -4.47013600 | -3.63188200 | -0.69645900 |
| F  | -0.52056600 | -7.09333700 | -0.45017200 |
| F  | 0.51525400  | -7.10232800 | -2.36719500 |
| F  | -1.58355600 | -6.52459300 | -2.26504800 |
| C  | -1.01297900 | -0.60714500 | 0.31407500  |
| O  | -1.42326400 | 0.53702900  | 0.45859700  |



## 12a

|                                              |                             |
|----------------------------------------------|-----------------------------|
| Zero-point correction=                       | 0.280361 (Hartree/Particle) |
| Thermal correction to Energy=                | 0.308619                    |
| Thermal correction to Enthalpy=              | 0.309563                    |
| Thermal correction to Gibbs Free Energy=     | 0.216329                    |
| Sum of electronic and zero-point Energies=   | -1856.339805                |
| Sum of electronic and thermal Energies=      | -1856.311547                |
| Sum of electronic and thermal Enthalpies=    | -1856.310603                |
| Sum of electronic and thermal Free Energies= | -1856.403837                |

|    |             |             |             |
|----|-------------|-------------|-------------|
| C  | -1.93659400 | 0.46039500  | -0.75805800 |
| C  | -2.02737700 | 1.31592700  | 0.35214800  |
| C  | -2.47403300 | 0.86568500  | -1.99134600 |
| C  | -2.65432100 | 2.56440000  | 0.23706000  |
| C  | -3.10528600 | 2.11120500  | -2.11535100 |
| C  | -3.18447700 | 2.94120800  | -0.99703900 |
| H  | -3.52868200 | 2.43262600  | -3.05880900 |
| H  | -3.67193400 | 3.90774400  | -1.08974800 |
| C  | 0.51844200  | -4.95070300 | -2.02485400 |
| O  | 1.57849500  | -4.69704300 | -1.38122200 |
| C  | 0.34795900  | -6.32917900 | -2.68092900 |
| O  | -0.37822400 | -4.07087000 | -2.17748300 |
| Pd | 0.84641400  | -2.70811000 | -1.09285200 |
| O  | -0.07157700 | -0.92812800 | -1.09577100 |
| C  | 3.54609100  | -0.72283400 | 1.95570900  |
| H  | 4.45236100  | -0.71730300 | 1.34590300  |
| H  | 3.52206500  | 0.13332200  | 2.63477900  |
| H  | 3.46668500  | -1.65240200 | 2.52230600  |
| C  | 2.47576500  | 0.88411100  | -0.04179300 |
| H  | 1.69128300  | 0.98913300  | -0.79211900 |
| H  | 2.44890300  | 1.72425400  | 0.65758800  |
| H  | 3.45943300  | 0.78966200  | -0.50776800 |
| S  | 2.09317500  | -0.63306600 | 0.87678900  |
| O  | 2.41442600  | -1.80934200 | -0.13973200 |
| H  | -2.72976300 | 3.23364800  | 1.08520000  |
| F  | 0.89460900  | -7.28810600 | -1.92081200 |
| F  | 0.96806100  | -6.33053900 | -3.87666800 |
| F  | -0.94543100 | -6.61441900 | -2.87428200 |
| C  | -1.29641800 | -0.90041500 | -0.61751400 |
| O  | -1.88071700 | -1.84988300 | -0.10640200 |
| O  | -2.34143100 | -0.03233400 | -3.00954800 |
| O  | -1.46006100 | 0.84524000  | 1.50132100  |
| C  | -2.88136300 | 0.30100000  | -4.28616300 |
| H  | -3.96602200 | 0.45180400  | -4.23289600 |
| H  | -2.40696300 | 1.20002200  | -4.69716200 |
| H  | -2.66406800 | -0.55124800 | -4.93111900 |
| C  | -1.55671500 | 1.64004200  | 2.68048400  |
| H  | -1.06509700 | 1.06546900  | 3.46659800  |
| H  | -1.04524900 | 2.60211100  | 2.55718500  |
| H  | -2.60294300 | 1.81599700  | 2.95677200  |

## TS-1

|                                              |                             |
|----------------------------------------------|-----------------------------|
| Zero-point correction=                       | 0.279784 (Hartree/Particle) |
| Thermal correction to Energy=                | 0.307576                    |
| Thermal correction to Enthalpy=              | 0.308520                    |
| Thermal correction to Gibbs Free Energy=     | 0.216876                    |
| Sum of electronic and zero-point Energies=   | -1856.330459                |
| Sum of electronic and thermal Energies=      | -1856.302667                |
| Sum of electronic and thermal Enthalpies=    | -1856.301723                |
| Sum of electronic and thermal Free Energies= | -1856.393367                |

|    |             |             |             |
|----|-------------|-------------|-------------|
| C  | -1.30146000 | -0.72069700 | -1.96872000 |
| C  | -0.79690700 | -0.96739300 | -3.26859600 |
| C  | -2.54582100 | -1.27557600 | -1.59174400 |
| C  | -1.49138800 | -1.80112500 | -4.15040100 |
| C  | -3.24294200 | -2.11083100 | -2.47464100 |
| C  | -2.70362000 | -2.35934000 | -3.73549100 |
| H  | -4.18772300 | -2.55734100 | -2.19198300 |
| H  | -3.24463700 | -3.00596700 | -4.42064800 |
| C  | -0.54801300 | -4.65275500 | -0.37825500 |
| O  | -2.98030400 | -0.93102000 | -0.35386000 |
| C  | -4.15745400 | -1.56059000 | 0.15696000  |
| H  | -4.02973900 | -2.64728400 | 0.19397600  |
| H  | -4.28455700 | -1.16879300 | 1.16653100  |
| H  | -5.03580600 | -1.30519000 | -0.44637800 |
| O  | 0.62120200  | -4.24329600 | -0.71549000 |
| C  | -0.72881800 | -6.18271500 | -0.45852500 |
| O  | -1.48229200 | -3.92420600 | -0.02496800 |
| Pd | 0.46589100  | -2.21015400 | -0.51876200 |
| O  | 0.29917700  | -0.23798200 | -0.27547900 |
| C  | 4.87887700  | -1.21974300 | 0.44080100  |
| H  | 5.29565000  | -1.76754000 | -0.40734800 |
| H  | 5.46564100  | -0.32355600 | 0.65871700  |
| H  | 4.82508300  | -1.85708300 | 1.32515200  |
| C  | 3.49120900  | 0.23635700  | -1.47273700 |
| H  | 2.51280500  | 0.45901500  | -1.90216900 |
| H  | 4.00705200  | 1.16264300  | -1.20470000 |
| H  | 4.08976700  | -0.36417100 | -2.16175500 |
| S  | 3.18547600  | -0.70454200 | 0.04978200  |
| O  | 2.55985300  | -2.07338300 | -0.43752900 |
| H  | -1.11279700 | -2.00824200 | -5.14328100 |
| O  | 0.37155200  | -0.33548200 | -3.56336900 |
| C  | 0.96019400  | -0.55586100 | -4.84653900 |
| H  | 0.29244000  | -0.22304400 | -5.64874200 |
| H  | 1.87201600  | 0.04151300  | -4.85937400 |
| H  | 1.21071400  | -1.61327100 | -4.98838400 |
| F  | -0.57187000 | -6.60505600 | -1.72974900 |
| F  | -1.94579800 | -6.55664600 | -0.04123900 |
| F  | 0.18878300  | -6.81132000 | 0.30196000  |
| C  | -0.61216100 | 0.28691500  | -1.06873300 |
| O  | -0.88107400 | 1.47744600  | -1.08264400 |

## 13

|                                              |                             |
|----------------------------------------------|-----------------------------|
| Zero-point correction=                       | 0.280180 (Hartree/Particle) |
| Thermal correction to Energy=                | 0.308556                    |
| Thermal correction to Enthalpy=              | 0.309500                    |
| Thermal correction to Gibbs Free Energy=     | 0.217018                    |
| Sum of electronic and zero-point Energies=   | -1856.347989                |
| Sum of electronic and thermal Energies=      | -1856.319613                |
| Sum of electronic and thermal Enthalpies=    | -1856.318669                |
| Sum of electronic and thermal Free Energies= | -1856.411151                |

|    |             |             |             |
|----|-------------|-------------|-------------|
| C  | -1.49367900 | -2.11308200 | 0.85057600  |
| C  | -2.40200500 | -2.63885200 | -0.13980500 |
| C  | -1.11611800 | -2.96829700 | 1.94978800  |
| C  | -2.75515900 | -3.98837600 | -0.12521000 |
| C  | -1.47563500 | -4.31724300 | 1.94764500  |
| C  | -2.27990200 | -4.79609500 | 0.91124700  |
| H  | -1.16289300 | -4.98379200 | 2.74065200  |
| H  | -2.56288200 | -5.84488500 | 0.91956500  |
| O  | 1.83762000  | -4.46488900 | -0.35845600 |
| O  | -0.43060600 | -2.35852300 | 2.92890600  |
| C  | 0.11078600  | -3.14816200 | 3.99837300  |
| H  | 0.80624600  | -3.89754700 | 3.60744600  |
| H  | 0.64254000  | -2.44371500 | 4.63673200  |
| H  | -0.68915600 | -3.63276000 | 4.56646200  |
| O  | 0.80758000  | -3.88902700 | -0.86449400 |
| C  | 2.05247600  | -5.86988000 | -0.98112900 |
| O  | 2.62273400  | -4.05814600 | 0.49575000  |
| Pd | 0.37998500  | -1.98535700 | -0.25005500 |
| O  | -0.28235600 | -0.18253600 | 0.40146300  |
| C  | 4.67936200  | -1.83602600 | -0.87141900 |
| H  | 4.77952000  | -1.79771400 | -1.95891500 |
| H  | 5.58545400  | -1.47350700 | -0.37847300 |
| H  | 4.43755300  | -2.84496800 | -0.53276400 |
| C  | 3.78791300  | 0.77824000  | -1.12719200 |
| H  | 2.98507400  | 1.49494900  | -0.94380900 |
| H  | 4.71166000  | 1.11947700  | -0.65220700 |
| H  | 3.93030200  | 0.62463500  | -2.19971600 |
| S  | 3.28945000  | -0.78826000 | -0.35792400 |
| O  | 2.09397000  | -1.26478800 | -1.26540900 |
| H  | -3.40088000 | -4.40942900 | -0.88473200 |
| O  | -2.85550500 | -1.73531700 | -1.02259800 |
| C  | -3.68486000 | -2.17506800 | -2.10801600 |
| H  | -4.61473200 | -2.61225500 | -1.73162000 |
| H  | -3.90486900 | -1.27797000 | -2.68533900 |
| H  | -3.15095200 | -2.89926000 | -2.73131200 |
| F  | 3.11300600  | -6.49491500 | -0.44756400 |
| F  | 2.25717900  | -5.77466000 | -2.31292200 |
| O  | 0.97083200  | -6.65547400 | -0.78994300 |
| C  | -1.36973200 | -0.58232600 | 1.01130300  |
| O  | -2.17177300 | 0.10784600  | 1.61273800  |

## TS-2

|                                              |                             |
|----------------------------------------------|-----------------------------|
| Zero-point correction=                       | 0.277716 (Hartree/Particle) |
| Thermal correction to Energy=                | 0.306223                    |
| Thermal correction to Enthalpy=              | 0.307167                    |
| Thermal correction to Gibbs Free Energy=     | 0.214465                    |
| Sum of electronic and zero-point Energies=   | -1856.324524                |
| Sum of electronic and thermal Energies=      | -1856.296017                |
| Sum of electronic and thermal Enthalpies=    | -1856.295073                |
| Sum of electronic and thermal Free Energies= | -1856.387775                |

|    |             |             |             |
|----|-------------|-------------|-------------|
| C  | -1.35755100 | -2.61069600 | 0.67570400  |
| C  | -2.49855300 | -2.79515000 | -0.16021500 |
| C  | -1.34786300 | -3.25246800 | 1.94984800  |
| C  | -3.61431600 | -3.50594000 | 0.29193400  |
| C  | -2.46297400 | -3.96355800 | 2.40458000  |
| C  | -3.57494800 | -4.07270500 | 1.56759500  |
| H  | -2.47552000 | -4.43387200 | 3.37974200  |
| H  | -4.44135800 | -4.62571500 | 1.91996500  |
| C  | 1.92036900  | -4.28248300 | -0.63025900 |
| O  | 0.83121800  | -3.71617800 | -0.99658800 |
| C  | 2.30295900  | -5.49985600 | -1.51088800 |
| O  | 2.71104200  | -3.97148800 | 0.26065800  |
| Pd | 0.36314900  | -1.92461700 | -0.12133700 |
| O  | -0.44906700 | -0.19780700 | 0.76952400  |
| C  | 4.66748100  | -1.74804600 | -1.20728200 |
| H  | 4.63939400  | -1.32324800 | -2.21401300 |
| H  | 5.65266100  | -1.61551500 | -0.75169300 |
| H  | 4.39878900  | -2.80504300 | -1.21966300 |
| C  | 3.97901300  | 0.80504300  | -0.41050700 |
| H  | 3.26312200  | 1.44446200  | 0.11009800  |
| H  | 4.97310000  | 0.92385000  | 0.02873500  |
| H  | 3.99177700  | 1.03553100  | -1.47871600 |
| S  | 3.43220900  | -0.91101500 | -0.16956300 |
| O  | 2.10646300  | -0.98463300 | -1.00008800 |
| H  | -4.49490500 | -3.63151900 | -0.32556000 |
| F  | 1.28811600  | -5.97119500 | -2.25417100 |
| F  | 2.76887100  | -6.51391600 | -0.75920100 |
| F  | 3.29508700  | -5.13033100 | -2.35848500 |
| C  | -1.52212100 | -0.57370600 | 1.23556600  |
| O  | -2.51661800 | -0.30256200 | 1.81198300  |
| O  | -2.42240100 | -2.21369100 | -1.38160900 |
| O  | -0.21403400 | -3.09099500 | 2.67398400  |
| C  | -0.15707900 | -3.62333900 | 4.00124300  |
| H  | -0.25658600 | -4.71399200 | 3.99139000  |
| H  | 0.82645200  | -3.34959800 | 4.38308000  |
| H  | -0.93530200 | -3.18466500 | 4.63515800  |
| C  | -3.56024400 | -2.27182300 | -2.24769700 |
| H  | -3.27404900 | -1.72033200 | -3.14324000 |
| H  | -3.79810600 | -3.30726500 | -2.51379700 |
| H  | -4.43206200 | -1.79764700 | -1.78399800 |

**7+CO<sub>2</sub>**

|                                              |                             |
|----------------------------------------------|-----------------------------|
| Zero-point correction=                       | 0.277776 (Hartree/Particle) |
| Thermal correction to Energy=                | 0.307565                    |
| Thermal correction to Enthalpy=              | 0.308510                    |
| Thermal correction to Gibbs Free Energy=     | 0.210723                    |
| Sum of electronic and zero-point Energies=   | -1856.335810                |
| Sum of electronic and thermal Energies=      | -1856.306020                |
| Sum of electronic and thermal Enthalpies=    | -1856.305076                |
| Sum of electronic and thermal Free Energies= | -1856.402863                |

|    |             |             |             |
|----|-------------|-------------|-------------|
| C  | -1.12936400 | -2.90910400 | 0.55499800  |
| C  | -2.28840100 | -3.12639900 | -0.20762200 |
| C  | -1.11794000 | -3.30897000 | 1.90101700  |
| C  | -3.42232400 | -3.72793500 | 0.36256300  |
| C  | -2.24459200 | -3.91208300 | 2.48387400  |
| C  | -3.38150000 | -4.11482800 | 1.70207400  |
| H  | -2.24209100 | -4.22002000 | 3.52278700  |
| H  | -4.25608600 | -4.58169600 | 2.14705200  |
| C  | 2.10254200  | -4.38183200 | -0.69243700 |
| O  | 0.04552900  | -3.06058900 | 2.58952700  |
| C  | 0.13072300  | -3.47516800 | 3.94974200  |
| H  | 0.00205700  | -4.56003800 | 4.04658900  |
| H  | 1.13233200  | -3.19855000 | 4.28237500  |
| H  | -0.61342800 | -2.96431500 | 4.57306300  |
| O  | 0.98504800  | -3.87012100 | -1.06299500 |
| C  | 2.41292100  | -5.67109200 | -1.50017700 |
| O  | 2.91256500  | -3.99175200 | 0.14545500  |
| Pd | 0.47435600  | -2.05662700 | -0.25560100 |
| O  | -0.21610100 | -0.05280100 | 0.53605000  |
| C  | 4.78312700  | -1.64475200 | -1.20098500 |
| H  | 4.76501700  | -1.36910600 | -2.25853400 |
| H  | 5.73341800  | -1.36564000 | -0.73752300 |
| H  | 4.59569000  | -2.71108600 | -1.06750500 |
| C  | 3.89902900  | 0.93045600  | -0.74119500 |
| H  | 3.12377900  | 1.57783900  | -0.32644900 |
| H  | 4.86257600  | 1.15750100  | -0.27733800 |
| H  | 3.95004600  | 1.04284100  | -1.82721300 |
| S  | 3.44246800  | -0.78020200 | -0.33161900 |
| O  | 2.16492600  | -1.03539900 | -1.19614000 |
| H  | -4.32095000 | -3.89472600 | -0.21947900 |
| O  | -2.23420600 | -2.70881500 | -1.51474300 |
| C  | -3.37243500 | -2.92575100 | -2.34304600 |
| H  | -4.25120600 | -2.38770300 | -1.96671900 |
| H  | -3.10349400 | -2.53597100 | -3.32596600 |
| H  | -3.60934200 | -3.99331900 | -2.42751400 |
| F  | 3.51841600  | -6.28506900 | -1.05126200 |
| F  | 2.61043800  | -5.37012700 | -2.80332200 |
| F  | 1.39512300  | -6.55340800 | -1.43434000 |
| C  | -1.18684100 | 0.12964300  | 1.18124400  |
| O  | -2.13108000 | 0.35516400  | 1.81694000  |

B3LYP/6-31G(d) (SDD for Pd)  
gas phase

9

Zero-point correction= 0.362995 (Hartree/Particle)  
 Thermal correction to Energy= 0.397961  
 Thermal correction to Enthalpy= 0.398905  
 Thermal correction to Gibbs Free Energy= 0.291718  
 Sum of electronic and zero-point Energies= -2409.451699  
 Sum of electronic and thermal Energies= -2409.416733  
 Sum of electronic and thermal Enthalpies= -2409.415789  
 Sum of electronic and thermal Free Energies= -2409.522976

|    |             |             |             |
|----|-------------|-------------|-------------|
| C  | 0.14897600  | 1.67259100  | 2.53971100  |
| C  | -0.31320200 | 1.42107500  | 3.84135900  |
| C  | 0.16499600  | 2.99651100  | 2.07091900  |
| C  | -0.72930400 | 2.47118600  | 4.67164600  |
| C  | -0.26087000 | 4.05278600  | 2.88733600  |
| C  | -0.69746200 | 3.77465200  | 4.18135500  |
| H  | -0.25260000 | 5.07519500  | 2.53006000  |
| H  | -1.02234900 | 4.59178400  | 4.81985300  |
| C  | 1.56433000  | -4.12261200 | -1.24345300 |
| O  | 0.60226200  | 3.16453600  | 0.78518500  |
| C  | 0.63297400  | 4.47655400  | 0.25024800  |
| H  | 1.30877000  | 5.12950100  | 0.81820300  |
| H  | 1.00519300  | 4.37444500  | -0.77098500 |
| H  | -0.36809500 | 4.92673800  | 0.22558000  |
| O  | 0.46638100  | -3.71447700 | -0.71809900 |
| C  | 1.36703000  | -5.50015400 | -1.93244700 |
| O  | 2.66402800  | -3.58144300 | -1.29742200 |
| Pd | 0.30631000  | -1.94052100 | 0.27200400  |
| O  | 1.89086000  | 0.48701000  | 1.41485300  |
| C  | 3.13214500  | -1.01583500 | -2.92984900 |
| H  | 2.44309900  | -0.58341700 | -3.66029300 |
| H  | 4.15174800  | -0.65087500 | -3.08792700 |
| H  | 3.11044000  | -2.10551500 | -2.95842000 |
| C  | 2.64754400  | 1.25617200  | -1.45675700 |
| H  | 2.25869100  | 1.67704100  | -0.52846200 |
| H  | 3.68839000  | 1.55917200  | -1.60887200 |
| H  | 2.02858000  | 1.53711400  | -2.31325700 |
| S  | 2.60200500  | -0.55011300 | -1.25352100 |
| O  | 1.05410200  | -0.86095400 | -1.30934700 |
| H  | -1.07622800 | 2.28156700  | 5.68028600  |
| O  | -0.31995400 | 0.10741900  | 4.22861500  |
| C  | -0.48361300 | -0.18713000 | 5.60697500  |
| H  | -1.49462300 | 0.05782600  | 5.96078700  |
| H  | -0.31994500 | -1.26214600 | 5.70272000  |
| H  | 0.25096500  | 0.34886500  | 6.22114900  |
| F  | 2.53623500  | -6.10630300 | -2.17912400 |
| F  | 0.72980200  | -5.33335900 | -3.11505900 |
| F  | 0.61692500  | -6.33696800 | -1.18346700 |
| C  | 0.68858000  | 0.54908200  | 1.67647000  |
| O  | -0.23294200 | -0.27385900 | 1.27603600  |
| S  | -1.89686800 | -3.39885600 | 2.06041200  |
| O  | -0.39477600 | -3.05496300 | 1.87262100  |
| C  | -2.50186700 | -4.07046200 | 0.47835700  |
| H  | -2.34634600 | -3.33584300 | -0.31579200 |
| H  | -1.91197700 | -4.96298700 | 0.26137100  |
| H  | -3.56092000 | -4.32129800 | 0.59463900  |
| C  | -2.82161300 | -1.82961900 | 2.07637700  |
| H  | -2.40777000 | -1.23282600 | 2.89159800  |
| H  | -2.67107500 | -1.29488900 | 1.13634400  |
| H  | -3.87724600 | -2.06090500 | 2.25099700  |

12

Zero-point correction= 0.280662 (Hartree/Particle)  
 Thermal correction to Energy= 0.308887  
 Thermal correction to Enthalpy= 0.309831  
 Thermal correction to Gibbs Free Energy= 0.216518  
 Sum of electronic and zero-point Energies= -1856.310071  
 Sum of electronic and thermal Energies= -1856.281846  
 Sum of electronic and thermal Enthalpies= -1856.280902  
 Sum of electronic and thermal Free Energies= -1856.374215

|    |             |             |             |
|----|-------------|-------------|-------------|
| C  | -1.80566200 | 0.50606700  | -0.77074400 |
| C  | -1.73300000 | 1.52094500  | 0.19065700  |
| C  | -2.55573800 | 0.72000700  | -1.93941500 |
| C  | -2.41739100 | 2.73040100  | 0.00960800  |
| C  | -3.24245900 | 1.92613300  | -2.13361000 |
| C  | -3.16542800 | 2.91353700  | -1.15247300 |
| H  | -3.82891300 | 2.09607500  | -3.02835700 |
| H  | -3.69810700 | 3.84939300  | -1.29836100 |
| C  | 0.63831600  | -4.76381500 | -2.36891700 |
| O  | 1.60230300  | -4.65791300 | -1.55513700 |
| C  | 0.47404300  | -6.04707300 | -3.19595300 |
| O  | -0.16944500 | -3.80392400 | -2.54376900 |
| Pd | 0.92484400  | -2.68437800 | -1.13674100 |
| O  | 0.07095200  | -0.87407400 | -1.08748700 |
| C  | 3.17199400  | -0.89546000 | 2.39946900  |
| H  | 4.14823700  | -0.90678600 | 1.90833000  |
| H  | 3.07874700  | -0.03933800 | 3.07400200  |
| H  | 3.01882200  | -1.82529100 | 2.95118500  |
| C  | 2.38429200  | 0.72399400  | 0.29851000  |
| H  | 1.71860100  | 0.82193000  | -0.55998500 |
| H  | 2.24479800  | 1.56450200  | 0.98441700  |
| H  | 3.42717600  | 0.63026800  | -0.01559900 |
| S  | 1.86464200  | -0.80244200 | 1.14030600  |
| O  | 2.32113800  | -1.97770000 | 0.19592200  |
| H  | -2.36818800 | 3.51912600  | 0.75075200  |
| F  | 0.97617300  | -7.10306300 | -2.54376900 |
| F  | 1.13636100  | -5.91163700 | -4.36168000 |
| C  | -0.81631000 | -6.27893400 | -3.46697500 |
| F  | -1.13871700 | -0.83550300 | -0.55256900 |
| O  | -1.67941800 | -1.74742900 | 0.04825600  |
| O  | -2.55702100 | -0.31635200 | -2.82026000 |
| O  | -0.94566800 | 1.24986100  | 1.28401700  |
| C  | -3.32395400 | -0.20565900 | -4.00798000 |
| H  | -4.39012200 | -0.06663200 | -3.78601900 |
| H  | -2.97303600 | 0.62257400  | -4.63781000 |
| H  | -3.18372800 | -1.14840600 | -4.53856700 |
| C  | -1.07364400 | 2.09225800  | 2.41838100  |
| H  | -0.49331100 | 1.61886300  | 3.21360700  |
| H  | -0.67328300 | 3.09782800  | 2.22910500  |
| H  | -2.11947900 | 2.17712800  | 2.73805700  |

12a

Zero-point correction= 0.280743 (Hartree/Particle)  
 Thermal correction to Energy= 0.308899  
 Thermal correction to Enthalpy= 0.309843  
 Thermal correction to Gibbs Free Energy= 0.216867  
 Sum of electronic and zero-point Energies= -1856.307484  
 Sum of electronic and thermal Energies= -1856.279328  
 Sum of electronic and thermal Enthalpies= -1856.278384  
 Sum of electronic and thermal Free Energies= -1856.371360

|    |             |             |             |
|----|-------------|-------------|-------------|
| C  | -1.36601200 | -1.70217200 | 1.30419400  |
| C  | -2.55036100 | -2.36309700 | 0.94134500  |
| C  | -0.72609800 | -2.04730200 | 2.50414100  |
| C  | -3.08367800 | -3.36742200 | 1.76110500  |
| C  | -1.25206700 | -3.04613400 | 3.33289700  |
| C  | -2.42744800 | -3.69122700 | 2.94660100  |
| H  | -0.76307900 | -3.32327600 | 4.25877400  |
| H  | -2.83982000 | -4.46708100 | 3.58615400  |
| C  | -0.16011600 | -4.99864500 | -1.39461000 |
| O  | 0.43182200  | -1.36458000 | 2.76668400  |
| C  | 1.08674300  | -1.60547800 | 4.00076100  |
| H  | 1.44402500  | -2.64125100 | 4.07515500  |
| H  | 1.94155700  | -0.92667200 | 4.02365700  |
| H  | 0.43049400  | -1.38735500 | 4.85303300  |
| O  | 1.08438100  | -4.77744600 | -1.33993400 |
| C  | -0.66979100 | -6.42713700 | -1.63255500 |
| O  | -0.99355000 | -4.06341900 | -1.20854300 |
| Pd | 0.63694200  | -2.74713500 | -0.88505000 |
| O  | -0.06144100 | -0.91308500 | -0.58463100 |
| C  | 4.39225800  | -0.29256200 | -0.01978200 |
| H  | 4.85860100  | -0.55676400 | -0.97197600 |
| H  | 4.65424900  | 0.72634800  | 0.27986600  |
| H  | 4.69619000  | -1.00025800 | 0.75421400  |
| C  | 2.34564600  | 0.71503000  | -1.57989400 |
| H  | 1.27872500  | 0.68314200  | -1.80267900 |
| H  | 2.63978100  | 1.72214900  | -1.26841900 |
| H  | 2.94370500  | 0.36950200  | -2.42751800 |
| S  | 2.58444700  | -0.41419800 | -0.17312600 |
| O  | 2.49235900  | -1.87495600 | -0.76928800 |
| H  | -3.99358400 | -3.88613100 | 1.48555300  |
| O  | -3.10711100 | -1.95088300 | -0.22962600 |
| C  | -4.17207400 | -2.71241700 | -0.77920900 |
| H  | -5.06366800 | -2.67981800 | -0.13916100 |
| H  | -4.40333800 | -2.24663700 | -1.73853200 |
| H  | -3.86745300 | -3.75311100 | -0.94135100 |
| F  | -0.72783500 | -7.08043600 | -0.45659500 |
| F  | 0.15192300  | -7.09714400 | -2.45052100 |
| F  | -1.89745900 | -6.41300400 | -2.16977300 |
| C  | -0.83050100 | -0.57696700 | 0.44932700  |
| O  | -1.07448400 | 0.59110800  | 0.68273100  |

TS-1

Zero-point correction= 0.280195 (Hartree/Particle)  
 Thermal correction to Energy= 0.307866  
 Thermal correction to Enthalpy= 0.308810  
 Thermal correction to Gibbs Free Energy= 0.217915  
 Sum of electronic and zero-point Energies= -1856.300472  
 Sum of electronic and thermal Energies= -1856.272802  
 Sum of electronic and thermal Enthalpies= -1856.271857  
 Sum of electronic and thermal Free Energies= -1856.362752

|    |             |             |             |
|----|-------------|-------------|-------------|
| Pd | -0.33083100 | 0.12911100  | -0.41511800 |
| S  | -3.29311700 | -0.88762900 | -0.54348000 |
| F  | 4.32579500  | -0.92599900 | -1.61614300 |
| F  | 3.06565700  | -2.63788700 | -2.09208300 |
| F  | 3.65373900  | -2.25378600 | -0.02896900 |
| O  | 1.12458400  | -1.30322700 | -0.24687400 |
| O  | -1.88507400 | -1.22848500 | 0.05743600  |
| O  | -1.72900900 | 1.51939200  | -0.63352800 |
| O  | 1.91263900  | 0.26690500  | -1.61675100 |
| O  | -2.05247400 | 3.64479100  | -0.00949200 |
| C  | 2.02724600  | -0.80898700 | -1.01073400 |
| C  | 3.29524300  | -1.66745100 | -1.18329500 |
| C  | -4.12055900 | -2.49857500 | -0.38069300 |
| C  | -4.18785800 | 0.02480200  | 0.75267700  |
| C  | -1.33996100 | 2.66749000  | -0.10185000 |
| H  | -5.17268900 | -2.39054800 | -0.65996100 |
| H  | -3.61844100 | -3.18440700 | -1.06612600 |
| H  | -4.01797200 | -2.85508400 | 0.64729700  |
| H  | -5.24343700 | 0.08558500  | 0.46973900  |
| H  | -4.06220700 | -0.49086400 | 1.70862600  |
| H  | -3.74574400 | 1.02165500  | 0.78246600  |
| C  | 0.09377800  | 2.62172600  | 0.40519000  |
| C  | 0.34644000  | 2.38736200  | 1.78000000  |
| C  | 1.16482500  | 3.00847400  | -0.43482300 |
| C  | 1.64337100  | 2.48186100  | 2.29049300  |
| C  | 2.46663000  | 3.10106500  | 0.07752100  |
| C  | 2.68293800  | 2.83766600  | 1.42648000  |
| H  | 1.85133100  | 2.29013400  | 3.33563500  |
| H  | 3.29703600  | 3.36867100  | -0.56327300 |
| H  | 3.69268800  | 2.90869200  | 1.82182200  |
| O  | 0.82568400  | 3.27712100  | -1.71545400 |
| O  | -0.75052700 | 2.07370900  | 2.52204500  |
| C  | 1.86505800  | 3.43639500  | -2.67825400 |
| H  | 2.50389800  | 2.54790300  | -2.70277700 |
| H  | 1.35785400  | 3.55598800  | -3.63646300 |
| H  | 2.46285900  | 4.33300900  | -2.47141200 |
| C  | -0.57840800 | 1.80909900  | 3.90735300  |
| H  | -1.57598200 | 1.59694200  | 4.29489000  |
| H  | 0.07002500  | 0.93903900  | 4.07027400  |
| H  | -0.16360700 | 2.67940500  | 4.43088600  |

## 13

Zero-point correction= 0.280556 (Hartree/Particle)  
 Thermal correction to Energy= 0.308848  
 Thermal correction to Enthalpy= 0.309792  
 Thermal correction to Gibbs Free Energy= 0.215397  
 Sum of electronic and zero-point Energies= -1856.317233  
 Sum of electronic and thermal Energies= -1856.288941  
 Sum of electronic and thermal Enthalpies= -1856.287996  
 Sum of electronic and thermal Free Energies= -1856.382392

|    |             |             |             |
|----|-------------|-------------|-------------|
| C  | -1.52192300 | -2.05976500 | 0.80692200  |
| C  | -2.43584400 | -2.60673000 | -0.16006200 |
| C  | -1.10071500 | -2.90358800 | 1.89370700  |
| C  | -2.77943600 | -3.95961700 | -0.12331100 |
| C  | -1.44928600 | -4.25722400 | 1.91476200  |
| C  | -2.27178600 | -4.75573400 | 0.90492500  |
| H  | -1.09770700 | -4.91442200 | 2.69970300  |
| H  | -2.53544000 | -5.80970100 | 0.92320100  |
| C  | 1.82096300  | -4.47951600 | -0.38997900 |
| O  | -0.38480400 | -2.28568800 | 2.84877800  |
| C  | 0.30169400  | -3.07696500 | 3.81954600  |
| H  | 0.99333000  | -3.77163300 | 3.32979900  |
| H  | 0.85968700  | -2.36676300 | 4.42983200  |
| H  | -0.40426500 | -3.62633500 | 4.45282000  |
| O  | 0.72506600  | -3.97454300 | -0.82660100 |
| C  | 2.00398900  | -5.93972000 | -0.88136500 |
| O  | 2.68235000  | -3.97328100 | 0.32963800  |
| Pd | 0.33601900  | -2.03578200 | -0.31902800 |
| O  | -0.24808800 | -0.19761200 | 0.26595900  |
| C  | 4.69476800  | -1.84683200 | -0.90333000 |
| H  | 4.78233100  | -1.68004700 | -1.98035800 |
| H  | 5.57833000  | -1.48025100 | -0.37126100 |
| H  | 4.52157400  | -2.90114500 | -0.67996800 |
| C  | 3.64093800  | 0.71766700  | -0.81499900 |
| H  | 2.77501100  | 1.33825800  | -0.57345400 |
| H  | 4.51983200  | 1.06544100  | -0.26365300 |
| H  | 3.82119000  | 0.72624900  | -1.89327500 |
| S  | 3.22712300  | -0.97304000 | -0.28381300 |
| O  | 2.10094700  | -1.38117600 | -1.28912100 |
| H  | -3.42829700 | -4.39457100 | -0.87260000 |
| O  | -2.90916700 | -1.72117400 | -1.05346900 |
| C  | -3.70946100 | -2.18975400 | -2.13721400 |
| H  | -4.64225700 | -2.63552000 | -1.77293200 |
| H  | -3.93523800 | -1.30647900 | -2.73458500 |
| H  | -3.15784500 | -2.91767500 | -2.74316200 |
| F  | 3.16719600  | -6.46084200 | -0.46267600 |
| F  | 1.98445100  | -6.00091200 | -2.22814400 |
| F  | 1.00871000  | -6.72764300 | -0.41825800 |
| C  | -1.34482200 | -0.52086500 | 0.91308300  |
| O  | -2.11107500 | 0.20697700  | 1.50156800  |

## TS-2

Zero-point correction= 0.278234 (Hartree/Particle)  
 Thermal correction to Energy= 0.306640  
 Thermal correction to Enthalpy= 0.307584  
 Thermal correction to Gibbs Free Energy= 0.214393  
 Sum of electronic and zero-point Energies= -1856.300091  
 Sum of electronic and thermal Energies= -1856.271685  
 Sum of electronic and thermal Enthalpies= -1856.270741  
 Sum of electronic and thermal Free Energies= -1856.363932

|    |             |             |             |
|----|-------------|-------------|-------------|
| C  | -1.35673100 | -2.52134600 | 0.66341800  |
| C  | -2.47605600 | -2.73628700 | -0.19130300 |
| C  | -1.32698000 | -3.21184400 | 1.90909000  |
| C  | -3.54477900 | -3.54523700 | 0.20640900  |
| C  | -2.39359000 | -4.02032000 | 2.31320600  |
| C  | -3.48209100 | -4.16967200 | 1.45272700  |
| H  | -2.38648500 | -4.53485200 | 3.26615200  |
| H  | -4.31134400 | -4.80000300 | 1.76378500  |
| C  | 1.92285500  | -4.25816300 | -0.68467000 |
| O  | 0.78615500  | -3.71792900 | -0.93176600 |
| C  | 2.02506400  | -5.66138500 | -1.34088100 |
| O  | 2.87479600  | -3.83356500 | -0.03117200 |
| Pd | 0.38553700  | -1.88508900 | -0.15199900 |
| O  | -0.38044600 | -0.13881200 | 0.70843700  |
| C  | 4.73825900  | -1.66678700 | -1.13044300 |
| H  | 4.69254600  | -1.25602000 | -2.14285400 |
| H  | 5.70553400  | -1.46039600 | -0.66205200 |
| H  | 4.53195800  | -2.73771400 | -1.12530800 |
| C  | 3.93375200  | 0.83405900  | -0.30775000 |
| H  | 3.17378900  | 1.44033400  | 0.19029700  |
| H  | 4.90540700  | 0.98328600  | 0.17285300  |
| H  | 3.97649600  | 1.09050800  | -1.36978100 |
| S  | 3.42504700  | -0.90792600 | -0.12519000 |
| O  | 2.14825600  | -0.97600500 | -1.01154900 |
| H  | -4.40644900 | -3.70134800 | -0.43090300 |
| F  | 1.12921500  | -6.50941600 | -0.79205200 |
| F  | 3.24677500  | -6.19419600 | -1.17889700 |
| F  | 1.77680400  | -5.59969700 | -2.66506300 |
| C  | -1.45239900 | -0.51713900 | 1.18673300  |
| O  | -2.43208700 | -0.21887500 | 1.77745200  |
| O  | -2.42876300 | -2.08376400 | -1.37642600 |
| O  | -0.21959800 | -2.99927400 | 2.65991400  |
| C  | -0.11552500 | -3.62627300 | 3.93371200  |
| H  | -0.13282300 | -4.71850000 | 3.83928200  |
| H  | 0.84810500  | -3.31241600 | 4.33630400  |
| H  | -0.91923300 | -3.30069100 | 4.60572300  |
| C  | -3.51492100 | -2.22200800 | -2.28604600 |
| H  | -3.25008200 | -1.61557800 | -3.15277700 |
| H  | -3.64007200 | -3.26650400 | -2.59512200 |
| H  | -4.45028500 | -1.85088200 | -1.84927100 |

**7+CO<sub>2</sub>**

|                                              |                             |
|----------------------------------------------|-----------------------------|
| Zero-point correction=                       | 0.278499 (Hartree/Particle) |
| Thermal correction to Energy=                | 0.307995                    |
| Thermal correction to Enthalpy=              | 0.308939                    |
| Thermal correction to Gibbs Free Energy=     | 0.213150                    |
| Sum of electronic and zero-point Energies=   | -1856.310837                |
| Sum of electronic and thermal Energies=      | -1856.281340                |
| Sum of electronic and thermal Enthalpies=    | -1856.280396                |
| Sum of electronic and thermal Free Energies= | -1856.376185                |

|    |             |             |             |
|----|-------------|-------------|-------------|
| C  | -1.20904300 | -2.83270100 | 0.61574900  |
| C  | -2.25179300 | -3.24945800 | -0.22640300 |
| C  | -1.29904900 | -3.10333000 | 1.98658600  |
| C  | -3.35296800 | -3.94865700 | 0.29344200  |
| C  | -2.39414300 | -3.79709800 | 2.52228900  |
| C  | -3.40538600 | -4.21863200 | 1.66024700  |
| H  | -2.46449300 | -4.00704600 | 3.58322500  |
| H  | -4.25651900 | -4.76086000 | 2.06356600  |
| C  | 1.96195000  | -4.19164900 | -0.87852300 |
| O  | -0.25788800 | -2.61748700 | 2.75666400  |
| C  | -0.21535700 | -2.97492600 | 4.12976800  |
| H  | -0.21045500 | -4.06434500 | 4.25780100  |
| H  | 0.71782700  | -2.56234200 | 4.51823900  |
| H  | -1.06073000 | -2.54755100 | 4.68560000  |
| O  | 0.80691400  | -3.68722500 | -1.10693600 |
| C  | 2.27632000  | -5.42435700 | -1.76537900 |
| O  | 2.85480400  | -3.81336400 | -0.11983600 |
| Pd | 0.40587900  | -1.94749300 | -0.11941900 |
| O  | -0.09059400 | -0.06142200 | 1.02583800  |
| C  | 4.56120300  | -1.72894200 | -1.66378500 |
| H  | 4.36735600  | -1.22991300 | -2.61735700 |
| H  | 5.61336300  | -1.63837400 | -1.37656700 |
| H  | 4.27296800  | -2.77936300 | -1.70237300 |
| C  | 4.16234600  | 0.74939100  | -0.55982400 |
| H  | 3.58339000  | 1.38046700  | 0.11824300  |
| H  | 5.22111600  | 0.78227800  | -0.28563000 |
| H  | 4.01330700  | 1.07943300  | -1.59154000 |
| S  | 3.53638600  | -0.95466300 | -0.37097200 |
| O  | 2.10891200  | -0.84930400 | -0.97326100 |
| H  | -4.15990100 | -4.27700300 | -0.35145100 |
| O  | -2.12421100 | -2.91486700 | -1.54602000 |
| C  | -3.03434200 | -3.47475000 | -2.47680200 |
| H  | -4.05798400 | -3.10825600 | -2.31719300 |
| H  | -2.68847600 | -3.15397100 | -3.46102200 |
| H  | -3.03189600 | -4.57143700 | -2.43049700 |
| F  | 2.78113700  | -6.42867000 | -1.02826900 |
| F  | 3.22086100  | -5.06897800 | -2.67542800 |
| F  | 1.21947400  | -5.89593500 | -2.44097800 |
| C  | -0.76910100 | 0.06687700  | 1.98072200  |
| O  | -1.43044300 | 0.27437200  | 2.91311300  |

B3LYP/6-31G(d) (LANL2DZ for PD) in DCM

9

Zero-point correction= 0.362650 (Hartree/Particle)  
 Thermal correction to Energy= 0.397797  
 Thermal correction to Enthalpy= 0.398741  
 Thermal correction to Gibbs Free Energy= 0.290833  
 Sum of electronic and zero-point Energies= -2408.288056  
 Sum of electronic and thermal Energies= -2408.252909  
 Sum of electronic and thermal Enthalpies= -2408.251965  
 Sum of electronic and thermal Free Energies= -2408.359873

|    |             |             |             |
|----|-------------|-------------|-------------|
| C  | 0.19626000  | 1.68360800  | 2.56165300  |
| C  | -0.30520200 | 1.43889400  | 3.85168600  |
| C  | 0.24864900  | 3.00488800  | 2.08649400  |
| C  | -0.73187100 | 2.49861100  | 4.66449000  |
| C  | -0.18388900 | 4.07046800  | 2.88794300  |
| C  | -0.66509600 | 3.80010200  | 4.16856300  |
| H  | -0.14970900 | 5.09130300  | 2.52834500  |
| H  | -0.99788800 | 4.62360400  | 4.79425800  |
| C  | 1.57021000  | -4.09971400 | -1.23166500 |
| O  | 0.72476000  | 3.15656500  | 0.81382600  |
| C  | 0.79257500  | 4.47105200  | 0.26749200  |
| H  | 1.46079500  | 5.11321600  | 0.85340100  |
| H  | 1.19400600  | 4.35382600  | -0.74000600 |
| H  | -0.20078300 | 4.93165600  | 0.21241800  |
| O  | 0.43881900  | -3.65561500 | -0.83008600 |
| C  | 1.39977800  | -5.46656700 | -1.95049700 |
| O  | 2.69309800  | -3.60627700 | -1.14942600 |
| Pd | 0.27469100  | -1.88849700 | 0.21597300  |
| O  | 1.92868700  | 0.39748900  | 1.52443800  |
| C  | 3.08351600  | -0.97786000 | -3.01204300 |
| H  | 2.40686400  | -0.54214200 | -3.75108500 |
| H  | 4.10966000  | -0.63534700 | -3.17108200 |
| H  | 3.04390400  | -2.06758400 | -3.03083400 |
| C  | 2.61906600  | 1.31966200  | -1.53913500 |
| H  | 2.23803400  | 1.74247300  | -0.60811300 |
| H  | 3.66016500  | 1.61639500  | -1.69436200 |
| H  | 1.99919700  | 1.61334600  | -2.38991500 |
| S  | 2.56476300  | -0.48252800 | -1.34525000 |
| O  | 1.01270100  | -0.79017200 | -1.37344000 |
| H  | -1.11133900 | 2.32036000  | 5.66294700  |
| O  | -0.32934500 | 0.12732300  | 4.23842700  |
| C  | -0.70354000 | -0.17539500 | 5.58052700  |
| H  | -1.74185200 | 0.11355400  | 5.78237600  |
| H  | -0.60366500 | -1.25724700 | 5.67870800  |
| H  | -0.04101500 | 0.31999200  | 6.30007100  |
| F  | 2.57998100  | -6.06289300 | -2.18172800 |
| F  | 0.78568200  | -5.29488100 | -3.14350700 |
| F  | 0.64349800  | -6.31867500 | -1.22534400 |
| C  | 0.71635900  | 0.54318100  | 1.71010400  |
| O  | -0.22896100 | -0.20692300 | 1.23419700  |
| S  | -1.82945500 | -3.45840900 | 2.10833400  |
| O  | -0.35174200 | -3.02714900 | 1.83952500  |
| C  | -2.47633100 | -4.17299400 | 0.56731700  |
| H  | -2.47420600 | -3.41941100 | -0.22363300 |
| H  | -1.81715000 | -5.00024500 | 0.29881800  |
| H  | -3.48832500 | -4.53570500 | 0.76669400  |
| C  | -2.82694200 | -1.94213200 | 2.18277300  |
| H  | -2.40403900 | -1.32964200 | 2.98114700  |
| H  | -2.76798600 | -1.40752700 | 1.23278800  |
| H  | -3.85567300 | -2.22953900 | 2.41693100  |

12

Zero-point correction= 0.280248 (Hartree/Particle)  
 Thermal correction to Energy= 0.308584  
 Thermal correction to Enthalpy= 0.309528  
 Thermal correction to Gibbs Free Energy= 0.216159  
 Sum of electronic and zero-point Energies= -1855.143450  
 Sum of electronic and thermal Energies= -1855.115114  
 Sum of electronic and thermal Enthalpies= -1855.114170  
 Sum of electronic and thermal Free Energies= -1855.207539

|    |             |             |             |
|----|-------------|-------------|-------------|
| C  | -1.93424600 | 0.46057300  | -0.77236500 |
| C  | -2.02141200 | 1.31165500  | 0.34137800  |
| C  | -2.45323600 | 0.88038300  | -2.00863600 |
| C  | -2.63029800 | 2.56915900  | 0.22773200  |
| C  | -3.06622200 | 2.13510100  | -2.13128100 |
| C  | -3.14426500 | 2.95992800  | -1.00898400 |
| C  | -3.47587900 | 2.46793300  | -3.07688800 |
| H  | -3.61730900 | 3.93370200  | -1.10069300 |
| C  | 0.51950900  | -4.98166300 | -2.01024400 |
| O  | 1.57700400  | -4.72882600 | -1.36410300 |
| C  | 0.34542800  | -6.36870300 | -2.64902400 |
| O  | -0.37661500 | -4.10475400 | -2.17776900 |
| Pd | 0.84063100  | -2.71933900 | -1.07680300 |
| O  | -0.07954000 | -0.93721600 | -1.09099900 |
| O  | 3.51211300  | -0.69314400 | 1.97776300  |
| H  | 4.42077500  | -0.68678900 | 1.37167500  |
| H  | 3.47905500  | 0.16868700  | 2.64917000  |
| H  | 3.43776800  | -1.61825400 | 2.55228200  |
| C  | 2.43567200  | 0.88599800  | -0.03963600 |
| H  | 1.64966100  | 0.97773800  | -0.79020400 |
| H  | 2.40383100  | 1.73303100  | 0.65100200  |
| S  | 3.41921200  | 0.79348100  | -0.50614200 |
| O  | 2.06357400  | -0.62632700 | 0.89038300  |
| H  | 2.40302600  | -1.80567200 | -0.11206300 |
| O  | -2.70376900 | 3.23501100  | 1.07873800  |
| F  | 0.88582400  | -7.32067100 | -1.87473700 |
| F  | 0.96761700  | -6.39277900 | -3.84379100 |
| F  | -0.94909300 | -6.65222200 | -2.84181400 |
| C  | -1.31356200 | -0.91038100 | -0.63489900 |
| O  | -1.91476700 | -1.86077000 | -0.14953900 |
| O  | -2.32156800 | -0.01369500 | -3.02981700 |
| O  | -1.46957900 | 0.82658900  | 1.49201100  |
| C  | -2.84065800 | 0.33470000  | -4.31078300 |
| H  | -3.92378800 | 0.50015100  | -4.27085400 |
| H  | -2.34896400 | 1.22952600  | -4.71057900 |
| H  | -2.62682900 | -0.51663200 | -4.95827400 |
| C  | -1.56420600 | 1.61614400  | 2.67472900  |
| H  | -1.08654400 | 1.03043100  | 3.46129700  |
| H  | -1.03861300 | 2.57175800  | 2.56085900  |
| H  | -2.60990900 | 1.80523300  | 2.94430600  |



## 12a

|                                              |                             |
|----------------------------------------------|-----------------------------|
| Zero-point correction=                       | 0.280356 (Hartree/Particle) |
| Thermal correction to Energy=                | 0.308609                    |
| Thermal correction to Enthalpy=              | 0.309554                    |
| Thermal correction to Gibbs Free Energy=     | 0.216647                    |
| Sum of electronic and zero-point Energies=   | -1855.138303                |
| Sum of electronic and thermal Energies=      | -1855.110049                |
| Sum of electronic and thermal Enthalpies=    | -1855.109105                |
| Sum of electronic and thermal Free Energies= | -1855.202012                |

|    |             |             |             |
|----|-------------|-------------|-------------|
| C  | -1.47545500 | -1.72082800 | 1.20604700  |
| C  | -2.69525000 | -2.36515200 | 0.93998200  |
| C  | -0.75150300 | -2.06107600 | 2.36082400  |
| C  | -3.17986400 | -3.35344800 | 1.80800600  |
| C  | -1.22864000 | -3.04548700 | 3.23636300  |
| C  | -2.43786000 | -3.67742400 | 2.94368600  |
| H  | -0.67887200 | -3.31621700 | 4.12922900  |
| H  | -2.81213800 | -4.44106700 | 3.61982300  |
| O  | -0.03157900 | -5.01699000 | -1.38005200 |
| C  | 0.41286700  | -1.36969100 | 2.54239900  |
| C  | 1.19101400  | -1.64446800 | 3.70454000  |
| H  | 1.53398100  | -2.68578500 | 3.71866200  |
| H  | 2.05337400  | -0.97890000 | 3.64784400  |
| H  | 0.62655900  | -1.43358100 | 4.62044900  |
| O  | 1.20175200  | -4.76275900 | -1.25135900 |
| C  | -0.47569600 | -6.46590600 | -1.63449100 |
| O  | -0.90584800 | -4.11155800 | -1.25920500 |
| Pd | 0.68180800  | -2.71468100 | -0.84897100 |
| O  | -0.11310500 | -0.89301800 | -0.62720400 |
| C  | 4.42696700  | -0.28509700 | 0.20573200  |
| H  | 4.96822800  | -0.61725800 | -0.68284600 |
| H  | 4.68427000  | 0.74567100  | 0.46292800  |
| H  | 4.63213700  | -0.94428800 | 1.05112800  |
| C  | 2.54812800  | 0.67326400  | -1.59807100 |
| H  | 1.50707600  | 0.64032600  | -1.92174200 |
| H  | 2.82728300  | 1.69503700  | -1.32631600 |
| H  | 3.21506800  | 0.27236400  | -2.36497600 |
| S  | 2.64331800  | -0.36186100 | -0.10991000 |
| O  | 2.53216100  | -1.85194600 | -0.64203000 |
| H  | -4.11522200 | -3.86209500 | 1.61045900  |
| O  | -3.33126700 | -1.96055200 | -0.19569500 |
| C  | -4.54964300 | -2.60508900 | -0.55751400 |
| H  | -5.32215200 | -2.45676200 | 0.20638000  |
| H  | -4.86730900 | -2.13633100 | -1.48985100 |
| H  | -4.39772500 | -3.67846700 | -0.72119100 |
| F  | -0.59285800 | -7.11120100 | -0.45780000 |
| F  | 0.42547600  | -7.11689500 | -2.38343800 |
| F  | -1.66179100 | -6.50299600 | -2.25564300 |
| C  | -1.00044600 | -0.60365000 | 0.30661300  |
| O  | -1.42436000 | 0.53794100  | 0.43063300  |

## TS-1

|                                              |                             |
|----------------------------------------------|-----------------------------|
| Zero-point correction=                       | 0.279918 (Hartree/Particle) |
| Thermal correction to Energy=                | 0.307633                    |
| Thermal correction to Enthalpy=              | 0.308578                    |
| Thermal correction to Gibbs Free Energy=     | 0.217903                    |
| Sum of electronic and zero-point Energies=   | -1855.135701                |
| Sum of electronic and thermal Energies=      | -1855.107986                |
| Sum of electronic and thermal Enthalpies=    | -1855.107041                |
| Sum of electronic and thermal Free Energies= | -1855.197716                |

|    |             |             |             |
|----|-------------|-------------|-------------|
| Pd | -0.35564700 | 0.12302800  | -0.66597800 |
| S  | -3.35593100 | -0.80169800 | -0.33720000 |
| F  | 4.22003500  | -1.19723800 | -2.15168600 |
| F  | 2.93764300  | -2.94708900 | -1.96733100 |
| F  | 3.79037400  | -2.02823500 | -0.18555900 |
| O  | 1.06699300  | -1.36948500 | -0.59289400 |
| O  | -1.85652500 | -1.24512800 | -0.11291000 |
| O  | -1.71823600 | 1.57707600  | -0.79978300 |
| O  | 2.01060600  | 0.25988900  | -1.79676300 |
| O  | -1.96858600 | 3.74853600  | -0.35967800 |
| C  | 2.02740400  | -0.86103800 | -1.27292600 |
| C  | 3.26823200  | -1.76931700 | -1.40145300 |
| C  | -4.19815300 | -2.40688200 | -0.28726800 |
| C  | -3.87871300 | -0.12333300 | 1.26281400  |
| C  | -1.29978100 | 2.72784400  | -0.31568800 |
| H  | -5.27670200 | -2.22899300 | -0.29664200 |
| H  | -3.90062400 | -2.95215500 | -1.18490000 |
| H  | -3.89419400 | -2.94698000 | 0.61204700  |
| H  | -4.94492400 | 0.11218800  | 1.20696900  |
| H  | -3.67590200 | -0.84988100 | 2.05321000  |
| H  | -3.29760000 | 0.78799400  | 1.41521500  |
| C  | 0.08015600  | 2.68032900  | 0.31075000  |
| C  | 0.21246900  | 2.37611100  | 1.68624300  |
| C  | 1.21821600  | 3.08271100  | -0.42337700 |
| C  | 1.46453500  | 2.43210600  | 2.30624400  |
| C  | 2.47427500  | 3.13535500  | 0.19589900  |
| C  | 2.57519100  | 2.80961400  | 1.54711800  |
| H  | 1.58248900  | 2.19555700  | 3.35615000  |
| H  | 3.35766600  | 3.42649200  | -0.35804100 |
| H  | 3.54877000  | 2.85207000  | 2.02722900  |
| O  | 0.98578600  | 3.40305400  | -1.72061500 |
| O  | -0.94766700 | 2.04954800  | 2.31909500  |
| C  | 2.10632300  | 3.64346300  | -2.57395600 |
| H  | 2.76736400  | 2.77125000  | -2.59620100 |
| H  | 1.68754400  | 3.81557700  | -3.56615400 |
| H  | 2.66404000  | 4.53176400  | -2.25618300 |
| C  | -0.89735500 | 1.72964600  | 3.71002300  |
| H  | -1.92537100 | 1.51116300  | 4.00025200  |
| H  | -0.26960900 | 0.84977200  | 3.89104400  |
| H  | -0.52317100 | 2.57637800  | 4.29616300  |

## 13

Zero-point correction= 0.280292 (Hartree/Particle)  
 Thermal correction to Energy= 0.308647  
 Thermal correction to Enthalpy= 0.309591  
 Thermal correction to Gibbs Free Energy= 0.216620  
 Sum of electronic and zero-point Energies= -1855.151951  
 Sum of electronic and thermal Energies= -1855.123596  
 Sum of electronic and thermal Enthalpies= -1855.122652  
 Sum of electronic and thermal Free Energies= -1855.215623

|    |            |            |            |
|----|------------|------------|------------|
| C  | -1.5153000 | -2.1119470 | 0.8234510  |
| C  | -2.4193610 | -2.6396420 | -0.1705450 |
| C  | -1.0645030 | -2.9957120 | 1.8716650  |
| C  | -2.6997150 | -4.0049060 | -0.2116790 |
| C  | -1.3502450 | -4.3610600 | 1.8109930  |
| C  | -2.1511660 | -4.8344100 | 0.7704280  |
| H  | -0.9770520 | -5.0463420 | 2.5607450  |
| H  | -2.3718080 | -5.8971810 | 0.7307910  |
| O  | 1.7189140  | -4.4213220 | -0.2479850 |
| C  | -0.3819330 | -2.3980640 | 2.8594270  |
| C  | 0.3245030  | -3.2141910 | 3.8069500  |
| H  | 1.0400980  | -3.8591590 | 3.2875900  |
| H  | 0.8517570  | -2.5140370 | 4.4540820  |
| H  | -0.3715130 | -3.8137250 | 4.4014790  |
| O  | 0.8067100  | -3.8031800 | -0.9036720 |
| C  | 1.8806040  | -5.8808650 | -0.7515050 |
| O  | 2.4234440  | -4.0263840 | 0.6799420  |
| Pd | 0.3437110  | -1.8932940 | -0.2863910 |
| O  | -0.3827370 | -0.1260090 | 0.4206280  |
| C  | 4.5901360  | -1.8290440 | -0.7134640 |
| H  | 4.7441110  | -1.8769720 | -1.7944540 |
| H  | 5.4948180  | -1.4910730 | -0.2007950 |
| H  | 4.2675870  | -2.7946400 | -0.3185560 |
| C  | 3.8844020  | 0.8121710  | -1.1913060 |
| H  | 3.1205880  | 1.5868580  | -1.1001770 |
| H  | 4.8035210  | 1.1313140  | -0.6929840 |
| H  | 4.0681460  | 0.5738740  | -2.2417000 |
| S  | 3.2485580  | -0.6623900 | -0.3458700 |
| O  | 2.0666310  | -1.1153960 | -1.2750450 |
| H  | -3.3396710 | -4.4248840 | -0.9767190 |
| O  | -2.9338940 | -1.7225000 | -1.0031600 |
| C  | -3.7695120 | -2.1549260 | -2.0858920 |
| H  | -4.6695280 | -2.6487210 | -1.7066140 |
| H  | -4.0434730 | -1.2464500 | -2.6209800 |
| H  | -3.2206210 | -2.8291160 | -2.7510150 |
| F  | 2.9109840  | -6.5018260 | -0.1556950 |
| F  | 2.0901560  | -5.9208430 | -2.0838210 |
| F  | 0.7632900  | -6.5966760 | -0.4927640 |
| C  | -1.4429280 | -0.5830060 | 1.0331860  |
| O  | -2.2601620 | 0.0574730  | 1.6690530  |

## TS-2

Zero-point correction= 0.277859 (Hartree/Particle)  
 Thermal correction to Energy= 0.306347  
 Thermal correction to Enthalpy= 0.307292  
 Thermal correction to Gibbs Free Energy= 0.214614  
 Sum of electronic and zero-point Energies= -1855.130485  
 Sum of electronic and thermal Energies= -1855.101997  
 Sum of electronic and thermal Enthalpies= -1855.101052  
 Sum of electronic and thermal Free Energies= -1855.193730

|    |            |            |            |
|----|------------|------------|------------|
| C  | -1.3683120 | -2.5846850 | 0.6837360  |
| C  | -2.5007120 | -2.7847690 | -0.1606160 |
| C  | -1.3420380 | -3.2459430 | 1.9478240  |
| C  | -3.5986820 | -3.5304070 | 0.2785400  |
| C  | -2.4403350 | -3.9914070 | 2.3879860  |
| C  | -3.5461120 | -4.1168450 | 1.5448870  |
| H  | -2.4432970 | -4.4779570 | 3.3552200  |
| H  | -4.3985750 | -4.6978900 | 1.8859990  |
| C  | 1.9011060  | -4.2704290 | -0.6350520 |
| O  | 0.8104850  | -3.7095360 | -0.9997830 |
| C  | 2.2731350  | -5.5077830 | -1.4935200 |
| O  | 2.7023150  | -3.9484040 | 0.2426540  |
| Pd | 0.3557860  | -1.9018130 | -0.1209420 |
| O  | -0.4769360 | -0.1754400 | 0.7841120  |
| C  | 4.6731760  | -1.7590250 | -1.1853760 |
| H  | 4.6579920  | -1.3525570 | -2.1999530 |
| H  | 5.6547880  | -1.6231540 | -0.7231160 |
| H  | 4.3988040  | -2.8146480 | -1.1810230 |
| C  | 3.9972590  | 0.8096570  | -0.4312580 |
| H  | 3.2802900  | 1.4620980  | 0.0714500  |
| H  | 4.9865180  | 0.9266730  | 0.0192510  |
| H  | 4.0256750  | 1.0271120  | -1.5019230 |
| S  | 3.4311210  | -0.8986760 | -0.1746890 |
| O  | 2.1155230  | -0.9727900 | -1.0127200 |
| H  | -4.4742480 | -3.6700270 | -0.3430740 |
| F  | 1.2603470  | -5.9730310 | -2.2436860 |
| F  | 2.7094720  | -6.5189770 | -0.7188240 |
| F  | 3.2843940  | -5.1729180 | -2.3324340 |
| C  | -1.5443770 | -0.5758010 | 1.2434390  |
| O  | -2.5428320 | -0.3141020 | 1.8211500  |
| O  | -2.4365090 | -2.1781390 | -1.3679080 |
| O  | -0.2165880 | -3.0624270 | 2.6759150  |
| C  | -0.1485420 | -3.6085210 | 3.9968740  |
| H  | -0.2168790 | -4.7014050 | 3.9741270  |
| H  | 0.8254250  | -3.3113170 | 4.3856510  |
| H  | -0.9411660 | -3.1997480 | 4.6329190  |
| C  | -3.5700530 | -2.2467430 | -2.2382680 |
| H  | -3.2960170 | -1.6690830 | -3.1210820 |
| H  | -3.7810200 | -3.2819450 | -2.5271850 |
| H  | -4.4547670 | -1.8049240 | -1.7670840 |

**7+CO<sub>2</sub>**

|                                              |                             |
|----------------------------------------------|-----------------------------|
| Zero-point correction=                       | 0.278012 (Hartree/Particle) |
| Thermal correction to Energy=                | 0.307725                    |
| Thermal correction to Enthalpy=              | 0.308670                    |
| Thermal correction to Gibbs Free Energy=     | 0.211526                    |
| Sum of electronic and zero-point Energies=   | -1855.143343                |
| Sum of electronic and thermal Energies=      | -1855.113629                |
| Sum of electronic and thermal Enthalpies=    | -1855.112685                |
| Sum of electronic and thermal Free Energies= | -1855.209829                |

|    |             |             |             |
|----|-------------|-------------|-------------|
| C  | -1.22195700 | -2.90335800 | 0.49033400  |
| C  | -2.29440600 | -3.30342600 | -0.32033600 |
| C  | -1.27550900 | -3.15140900 | 1.86773800  |
| C  | -3.40214900 | -3.96117200 | 0.24107100  |
| C  | -2.37655200 | -3.80553900 | 2.44213000  |
| C  | -3.42454000 | -4.20743300 | 1.61391900  |
| H  | -2.42263900 | -4.00094400 | 3.50698700  |
| H  | -4.27988500 | -4.71758900 | 2.04851200  |
| C  | 1.90891700  | -4.33047000 | -0.92162700 |
| O  | -0.19637500 | -2.69776200 | 2.59742900  |
| C  | -0.16015200 | -2.97585600 | 3.99543200  |
| H  | -0.18297700 | -4.05514200 | 4.18540300  |
| H  | 0.78239200  | -2.56243700 | 4.35677900  |
| H  | -0.99355700 | -2.49466800 | 4.52113300  |
| O  | 0.81784700  | -3.75540000 | -1.27155000 |
| C  | 2.19521200  | -5.56683400 | -1.81771400 |
| O  | 2.71277100  | -4.03839700 | -0.03839100 |
| Pd | 0.37531600  | -2.00348600 | -0.27163400 |
| O  | -0.11683600 | -0.10454200 | 0.91707300  |
| C  | 4.69573100  | -1.65190200 | -1.16521000 |
| H  | 4.70974400  | -1.33013900 | -2.20978000 |
| H  | 5.64938000  | -1.43686600 | -0.67525500 |
| H  | 4.45855600  | -2.71381600 | -1.08321000 |
| C  | 3.90513600  | 0.93716500  | -0.61868400 |
| H  | 3.14633900  | 1.59751700  | -0.19383600 |
| H  | 4.86796400  | 1.11282000  | -0.13153400 |
| H  | 3.97861000  | 1.08671800  | -1.69893100 |
| S  | 3.37693200  | -0.76930900 | -0.28011700 |
| O  | 2.10196300  | -0.94339700 | -1.15832500 |
| H  | -4.23614300 | -4.27602300 | -0.37499800 |
| O  | -2.19172400 | -3.00058500 | -1.65220100 |
| C  | -3.22035900 | -3.44585500 | -2.52874600 |
| H  | -4.18684400 | -2.98789300 | -2.28324500 |
| H  | -2.91671300 | -3.13102400 | -3.52849200 |
| H  | -3.32211300 | -4.53801700 | -2.50695300 |
| F  | 3.29641600  | -6.22406800 | -1.42026800 |
| F  | 2.38484500  | -5.18855900 | -3.10137700 |
| F  | 1.16569400  | -6.43875200 | -1.79748800 |
| C  | -0.09955700 | 0.08537400  | 2.07903000  |
| O  | -0.08803500 | 0.34092600  | 3.21255900  |

B3PW91/6-31G(d) (SDD for PD) in DCM

9  
 Zero-point correction= 0.363766 (Hartree/Particle)  
 Thermal correction to Energy= 0.398888  
 Thermal correction to Enthalpy= 0.399833  
 Thermal correction to Gibbs Free Energy= 0.290845  
 Sum of electronic and zero-point Energies= -2408.857444  
 Sum of electronic and thermal Energies= -2408.822322  
 Sum of electronic and thermal Enthalpies= -2408.821378  
 Sum of electronic and thermal Free Energies= -2408.930365

|    |             |             |              |
|----|-------------|-------------|--------------|
| C  | 0.24628100  | 1.63850600  | 2.62657700   |
| C  | -0.01899700 | 1.44290300  | 3.98922700   |
| C  | 0.08795400  | 2.91445200  | 2.06987700   |
| C  | -0.43495900 | 2.51151300  | 4.79268700   |
| C  | -0.32949200 | 3.99013500  | 2.86278200   |
| C  | -0.58377400 | 3.77003900  | 4.21453200   |
| H  | -0.45670400 | 4.98130100  | 2.44323500   |
| H  | -0.90749000 | 4.60217900  | 4.83427300   |
| C  | 1.54156800  | -4.08133900 | -1.111237500 |
| O  | 0.36035100  | 3.00767000  | 0.73903300   |
| C  | 0.20883400  | 4.27112700  | 0.111137100  |
| H  | 0.88231000  | 5.01842800  | 0.54816800   |
| H  | 0.47065400  | 4.11687700  | -0.93624000  |
| H  | -0.82588400 | 4.62835000  | 0.17798800   |
| O  | 0.38695300  | -3.61274500 | -0.82202800  |
| C  | 1.41083200  | -5.39848800 | -1.91916300  |
| O  | 2.65860200  | -3.64222400 | -0.85860500  |
| Pd | 0.21658700  | -1.88639000 | 0.24560500   |
| O  | 1.94008100  | 0.29394600  | 1.61185700   |
| C  | 3.23672700  | -1.06572700 | -2.78241400  |
| H  | 2.61131600  | -0.62141800 | -3.56087500  |
| H  | 4.27765200  | -0.74737300 | -2.88974600  |
| H  | 3.17802500  | -2.15483900 | -2.80347600  |
| C  | 2.75602300  | 1.23470300  | -1.36739900  |
| H  | 2.31487400  | 1.67957400  | -0.47400500  |
| H  | 3.81167400  | 1.51078900  | -1.44414900  |
| H  | 2.20978700  | 1.53356900  | -2.26580700  |
| S  | 2.64862700  | -0.55161400 | -1.15755900  |
| O  | 1.09698300  | -0.81908100 | -1.26323600  |
| H  | -0.64115700 | 2.37287500  | 5.84761600   |
| O  | 0.16069700  | 0.17237000  | 4.44060200   |
| C  | -0.05569500 | -0.08702200 | 5.81831900   |
| H  | -1.09538900 | 0.11285800  | 6.10529500   |
| H  | 0.16032600  | -1.14696100 | 5.95939200   |
| H  | 0.61725400  | 0.50813500  | 6.44748400   |
| F  | 2.60373000  | -5.94805900 | -2.17245800  |
| F  | 0.80371500  | -5.17176300 | -3.10072500  |
| F  | 0.67284800  | -6.30502200 | -1.25112200  |
| C  | 0.73365600  | 0.48714500  | 1.77698800   |
| O  | -0.23183100 | -0.22073600 | 1.28402500   |
| S  | -2.17058900 | -3.32843500 | 1.83123200   |
| O  | -0.65074700 | -2.98763400 | 1.74909600   |
| C  | -2.66650500 | -4.02162800 | 0.24129100   |
| H  | -2.47371700 | -3.30341400 | -0.55924800  |
| H  | -2.08200200 | -4.92945000 | 0.08363500   |
| H  | -3.73106700 | -4.26608800 | 0.30399400   |
| C  | -3.08049900 | -1.77263100 | 1.75309300   |
| H  | -2.80587600 | -1.18920000 | 2.63340200   |
| H  | -2.81444900 | -1.23115700 | 0.84239800   |
| H  | -4.14838700 | -2.00850400 | 1.77706800   |

12

Zero-point correction= 0.281528 (Hartree/Particle)  
 Thermal correction to Energy= 0.309666  
 Thermal correction to Enthalpy= 0.310610  
 Thermal correction to Gibbs Free Energy= 0.216867  
 Sum of electronic and zero-point Energies= -1855.821578  
 Sum of electronic and thermal Energies= -1855.793440  
 Sum of electronic and thermal Enthalpies= -1855.792496  
 Sum of electronic and thermal Free Energies= -1855.886239

|    |             |             |             |
|----|-------------|-------------|-------------|
| C  | -1.93028400 | 0.45035100  | -0.72097900 |
| C  | -2.07439000 | 1.28756900  | 0.39580700  |
| C  | -2.43173700 | 0.86353700  | -1.96523000 |
| C  | -2.71264900 | 2.52773900  | 0.27414000  |
| C  | -3.07511200 | 2.10035700  | -2.09450200 |
| C  | -3.20347900 | 2.91325600  | -0.97100400 |
| H  | -3.47172900 | 2.42869400  | -3.04809200 |
| H  | -3.70073100 | 3.87480000  | -1.06837800 |
| C  | 0.48571600  | -4.92398700 | -1.99907900 |
| O  | 1.55407000  | -4.67684600 | -1.37137700 |
| O  | 0.29632200  | -6.30111200 | -2.64762600 |
| O  | -0.40494000 | -4.03951500 | -2.13895200 |
| Pd | 0.83809300  | -2.70103700 | -1.07804600 |
| O  | -0.06481400 | -0.92637000 | -1.06821500 |
| C  | 3.54973100  | -0.67515500 | 1.89026100  |
| H  | 4.46539400  | -0.74336200 | 1.29809500  |
| H  | 3.55514300  | 0.21855400  | 2.52008100  |
| H  | 3.42468900  | -1.56522900 | 2.51015100  |
| C  | 2.57865100  | 0.85334100  | -0.18986500 |
| H  | 1.81793000  | 0.94720800  | -0.96652700 |
| H  | 2.56243700  | 1.73285100  | 0.46024500  |
| H  | 3.56969600  | 0.70559300  | -0.62619900 |
| S  | 2.12611500  | -0.58805900 | 0.79260200  |
| O  | 2.41475800  | -1.82167600 | -0.15138300 |
| H  | -2.82740700 | 3.18557500  | 1.12778700  |
| F  | 0.83224300  | -7.25928600 | -1.88606000 |
| F  | 0.91068900  | -6.31576800 | -3.84139500 |
| C  | -0.99734400 | -6.56935400 | -2.83417800 |
| F  | -1.28011400 | -0.90151700 | -0.57583300 |
| O  | -1.85239900 | -1.84800900 | -0.05048300 |
| O  | -2.25827000 | -0.01574000 | -2.98539300 |
| O  | -1.54650300 | 0.81289600  | 1.55431300  |
| C  | -2.76602800 | 0.32925700  | -4.26490600 |
| H  | -3.85364800 | 0.46741400  | -4.23922500 |
| H  | -2.29072700 | 1.23872900  | -4.65191000 |
| C  | -2.52321100 | -0.51073100 | -4.91702200 |
| H  | -1.69559900 | 1.59438300  | 2.72906300  |
| H  | -1.22865700 | 1.01961800  | 3.53010300  |
| H  | -1.18921200 | 2.56261700  | 2.63362700  |
| H  | -2.75333200 | 1.75749400  | 2.96798700  |

## 12a

|                                              |                             |
|----------------------------------------------|-----------------------------|
| Zero-point correction=                       | 0.281744 (Hartree/Particle) |
| Thermal correction to Energy=                | 0.309716                    |
| Thermal correction to Enthalpy=              | 0.310661                    |
| Thermal correction to Gibbs Free Energy=     | 0.219014                    |
| Sum of electronic and zero-point Energies=   | -1855.816477                |
| Sum of electronic and thermal Energies=      | -1855.788504                |
| Sum of electronic and thermal Enthalpies=    | -1855.787560                |
| Sum of electronic and thermal Free Energies= | -1855.879207                |

|    |             |             |             |
|----|-------------|-------------|-------------|
| C  | -1.47452500 | -1.73873300 | 1.20427800  |
| C  | -2.70929000 | -2.35134100 | 0.94090800  |
| C  | -0.75385400 | -2.10362300 | 2.35143400  |
| C  | -3.20705000 | -3.34038500 | 1.79753600  |
| C  | -1.24313800 | -3.09113300 | 3.21396700  |
| C  | -2.46436700 | -3.69456100 | 2.92116400  |
| H  | -0.69415700 | -3.38446700 | 4.10112000  |
| H  | -2.84911600 | -4.46039700 | 3.58958500  |
| O  | 0.03809200  | -4.99083300 | -1.35292800 |
| O  | 0.41635500  | -1.43587800 | 2.54054300  |
| C  | 1.18270800  | -1.74238600 | 3.69532000  |
| H  | 1.51232400  | -2.78829200 | 3.69035400  |
| H  | 2.05459500  | -1.08819400 | 3.65637500  |
| H  | 0.61774900  | -1.54068100 | 4.61321500  |
| O  | 1.26005500  | -4.70208800 | -1.20450900 |
| C  | -0.36474700 | -6.44979000 | -1.60087500 |
| O  | -0.85412900 | -4.10344800 | -1.25370500 |
| Pd | 0.68200400  | -2.70511600 | -0.83204300 |
| O  | -0.13360400 | -0.90784400 | -0.63462200 |
| C  | 4.32670900  | -0.20926100 | 0.25818500  |
| H  | 4.93408200  | -0.60901800 | -0.55703100 |
| H  | 4.57045300  | 0.83878700  | 0.45211600  |
| H  | 4.46805100  | -0.79683600 | 1.16748700  |
| C  | 2.59505800  | 0.59629600  | -1.73218300 |
| H  | 1.58870000  | 0.51261300  | -2.14615400 |
| H  | 2.82391800  | 1.64445600  | -1.51905600 |
| H  | 3.33518400  | 0.16082400  | -2.40828700 |
| S  | 2.58230500  | -0.31152200 | -0.17498200 |
| O  | 2.50032200  | -1.83337900 | -0.59935400 |
| H  | -4.15531600 | -3.82677200 | 1.60103800  |
| O  | -3.34418100 | -1.91974300 | -0.17913400 |
| C  | -4.59219800 | -2.50746500 | -0.51202700 |
| H  | -5.33711800 | -2.33469500 | 0.27408000  |
| H  | -4.91600900 | -2.01685600 | -1.43091500 |
| H  | -4.49094100 | -3.58453600 | -0.69101400 |
| F  | -0.45328000 | -7.09028500 | -0.42433200 |
| F  | 0.54866500  | -7.07120200 | -2.35198300 |
| F  | -1.54895400 | -6.52123700 | -2.21190900 |
| C  | -0.99238900 | -0.61625200 | 0.31929100  |
| O  | -1.39608000 | 0.52735300  | 0.47246600  |

## TS-1

|                                              |                             |
|----------------------------------------------|-----------------------------|
| Zero-point correction=                       | 0.280933 (Hartree/Particle) |
| Thermal correction to Energy=                | 0.308585                    |
| Thermal correction to Enthalpy=              | 0.309529                    |
| Thermal correction to Gibbs Free Energy=     | 0.218188                    |
| Sum of electronic and zero-point Energies=   | -1855.811782                |
| Sum of electronic and thermal Energies=      | -1855.784130                |
| Sum of electronic and thermal Enthalpies=    | -1855.783185                |
| Sum of electronic and thermal Free Energies= | -1855.874527                |

|    |             |             |             |
|----|-------------|-------------|-------------|
| Pd | -0.36499800 | 0.10194900  | -0.52298800 |
| S  | -3.33738800 | -0.84652100 | -0.36497100 |
| F  | 4.16818000  | -1.23399500 | -1.89568500 |
| F  | 2.89594400  | -2.98466100 | -1.72039600 |
| F  | 3.71524500  | -2.05307200 | 0.06334400  |
| O  | 1.02607200  | -1.37985300 | -0.32811300 |
| O  | -1.87333100 | -1.18375600 | 0.10728900  |
| O  | -1.70706000 | 1.54080000  | -0.75592200 |
| O  | 1.91107500  | 0.17139600  | -1.65351400 |
| O  | -1.94063200 | 3.71387600  | -0.31980900 |
| C  | 1.96621200  | -0.91080400 | -1.05757000 |
| C  | 3.21368500  | -1.80642500 | -1.15792000 |
| C  | -4.10853400 | -2.47276800 | -0.30614800 |
| C  | -4.11896400 | -0.08038900 | 1.06700600  |
| C  | -1.27720100 | 2.69153600  | -0.29202100 |
| H  | -5.18012200 | -2.35111500 | -0.48710900 |
| H  | -3.66277700 | -3.07052000 | -1.10373000 |
| H  | -3.92435100 | -2.93114000 | 0.66830200  |
| H  | -5.18151100 | 0.05798500  | 0.84752500  |
| H  | -3.97843400 | -0.71142600 | 1.94818900  |
| H  | -3.63746300 | 0.88942700  | 1.20346000  |
| C  | 0.12225900  | 2.63832400  | 0.28288000  |
| C  | 0.30815500  | 2.36511100  | 1.65746900  |
| C  | 1.22299800  | 3.05802400  | -0.49443800 |
| C  | 1.58125300  | 2.44362900  | 2.22709900  |
| C  | 2.49792800  | 3.14015200  | 0.07595800  |
| C  | 2.65428300  | 2.82887700  | 1.42356900  |
| H  | 1.74232100  | 2.22439400  | 3.27586100  |
| H  | 3.35597200  | 3.44240500  | -0.51232100 |
| H  | 3.64487800  | 2.89216400  | 1.86618100  |
| O  | 0.93704700  | 3.36400500  | -1.77889700 |
| O  | -0.81815400 | 2.04647300  | 2.33894300  |
| C  | 2.00963300  | 3.71187500  | -2.64510800 |
| H  | 2.73542400  | 2.89474800  | -2.71685300 |
| H  | 1.55581800  | 3.88538500  | -3.62137000 |
| H  | 2.50986200  | 4.62733700  | -2.30858800 |
| C  | -0.70550800 | 1.75074000  | 3.72503900  |
| H  | -1.71856900 | 1.53325800  | 4.06445200  |
| H  | -0.06757100 | 0.87530200  | 3.89276900  |
| H  | -0.31025500 | 2.60833500  | 4.28141400  |

## 13

Zero-point correction= 0.281207 (Hartree/Particle)  
 Thermal correction to Energy= 0.309531  
 Thermal correction to Enthalpy= 0.310475  
 Thermal correction to Gibbs Free Energy= 0.217712  
 Sum of electronic and zero-point Energies= -1855.832084  
 Sum of electronic and thermal Energies= -1855.803759  
 Sum of electronic and thermal Enthalpies= -1855.802815  
 Sum of electronic and thermal Free Energies= -1855.895578

|    |             |             |             |
|----|-------------|-------------|-------------|
| C  | -1.47040400 | -2.10485300 | 0.85104200  |
| C  | -2.37289500 | -2.62693000 | -0.14338300 |
| C  | -1.09581500 | -2.95962100 | 1.94853900  |
| C  | -2.72480600 | -3.97500000 | -0.13272900 |
| C  | -1.45432000 | -4.30719200 | 1.94197700  |
| C  | -2.25263100 | -4.78250700 | 0.90240400  |
| H  | -1.14313700 | -4.97687500 | 2.73404000  |
| H  | -2.53407400 | -5.83219200 | 0.90673600  |
| C  | 1.82083300  | -4.46923900 | -0.35325700 |
| O  | -0.42017800 | -2.35196800 | 2.92875000  |
| C  | 0.09504700  | -3.14105100 | 4.00206300  |
| H  | 0.79114900  | -3.89719800 | 3.62524800  |
| H  | 0.62301900  | -2.44148600 | 4.64912000  |
| H  | -0.71782500 | -3.61782100 | 4.55898900  |
| O  | 0.77939400  | -3.90394900 | -0.83991300 |
| C  | 2.03767300  | -5.86811600 | -0.98265400 |
| O  | 2.61557500  | -4.05781700 | 0.48621300  |
| Pd | 0.37676500  | -2.00624500 | -0.23499700 |
| O  | -0.24911800 | -0.19662500 | 0.39921300  |
| C  | 4.66584300  | -1.82920400 | -0.88280200 |
| H  | 4.76360000  | -1.78747200 | -1.97062100 |
| H  | 5.56545500  | -1.44698100 | -0.39230600 |
| H  | 4.45418200  | -2.84621200 | -0.54661400 |
| C  | 3.72177800  | 0.74740700  | -1.11472700 |
| H  | 2.90542200  | 1.44715600  | -0.92414200 |
| H  | 4.63807600  | 1.10635000  | -0.63768500 |
| H  | 3.86746700  | 0.61097000  | -2.18942600 |
| S  | 3.26219400  | -0.82584700 | -0.36353200 |
| O  | 2.08096400  | -1.32439900 | -1.26538200 |
| H  | -3.36633000 | -4.39647900 | -0.89670000 |
| O  | -2.82250600 | -1.72398600 | -1.02097200 |
| C  | -3.64422400 | -2.16477900 | -2.10250100 |
| H  | -4.57564800 | -2.60180000 | -1.72876300 |
| H  | -3.86459700 | -1.26986700 | -2.68336100 |
| H  | -3.10868100 | -2.88932500 | -2.72434900 |
| F  | 3.09802300  | -6.48980800 | -0.45476100 |
| F  | 2.24083700  | -5.76337400 | -2.30990200 |
| F  | 0.96287000  | -6.65650700 | -0.79641200 |
| C  | -1.33844500 | -0.57825200 | 1.00913600  |
| O  | -2.13298400 | 0.12113900  | 1.60604400  |

## TS-2

Zero-point correction= 0.278632 (Hartree/Particle)  
 Thermal correction to Energy= 0.307187  
 Thermal correction to Enthalpy= 0.308131  
 Thermal correction to Gibbs Free Energy= 0.214384  
 Sum of electronic and zero-point Energies= -1855.807650  
 Sum of electronic and thermal Energies= -1855.779095  
 Sum of electronic and thermal Enthalpies= -1855.778151  
 Sum of electronic and thermal Free Energies= -1855.871898

|    |             |             |             |
|----|-------------|-------------|-------------|
| C  | -1.29947600 | -2.64776400 | 0.63055700  |
| C  | -2.45083900 | -2.78781400 | -0.19255400 |
| C  | -1.30314300 | -3.27726000 | 1.90586100  |
| C  | -3.58983300 | -3.44919100 | 0.27297500  |
| C  | -2.44104600 | -3.93892500 | 2.37482200  |
| C  | -3.56252800 | -4.00796400 | 1.54991300  |
| H  | -2.46397600 | -4.40219200 | 3.35417800  |
| H  | -4.44797500 | -4.52286400 | 1.91390700  |
| C  | 1.93098600  | -4.33495100 | -0.65740800 |
| O  | 0.84615600  | -3.75762300 | -1.01697100 |
| C  | 2.16473300  | -5.62848000 | -1.47796900 |
| O  | 2.75742900  | -4.00551000 | 0.18757700  |
| Pd | 0.40293400  | -1.96969200 | -0.16061200 |
| O  | -0.37954800 | -0.23815100 | 0.72828900  |
| C  | 4.73359100  | -1.65577800 | -0.99139400 |
| H  | 4.75816100  | -1.33535300 | -2.03632500 |
| H  | 5.67030000  | -1.40930800 | -0.48338000 |
| H  | 4.53430100  | -2.72601200 | -0.91331700 |
| C  | 3.84734900  | 0.88734700  | -0.46477400 |
| H  | 3.06472900  | 1.52250200  | -0.04419200 |
| H  | 4.79927500  | 1.09485900  | 0.03178900  |
| H  | 3.92684200  | 1.04512400  | -1.54368500 |
| S  | 3.38038900  | -0.82497400 | -0.13630500 |
| O  | 2.13543500  | -1.04574500 | -1.04762500 |
| H  | -4.48095800 | -3.54285300 | -0.33658400 |
| F  | 1.11536900  | -6.46500700 | -1.38177600 |
| F  | 3.25302400  | -6.28771800 | -1.06379400 |
| F  | 2.33436200  | -5.33548600 | -2.78219700 |
| C  | -1.44635800 | -0.58628400 | 1.21349800  |
| O  | -2.43094700 | -0.32599100 | 1.80373400  |
| O  | -2.36109300 | -2.21943500 | -1.41456300 |
| O  | -0.16058300 | -3.15766700 | 2.61638300  |
| C  | -0.11871000 | -3.68888100 | 3.93666800  |
| H  | -0.26353600 | -4.77492300 | 3.92954500  |
| H  | 0.87749100  | -3.45775200 | 4.31444300  |
| H  | -0.87318100 | -3.21799200 | 4.57691500  |
| C  | -3.50456800 | -2.24196600 | -2.26258300 |
| H  | -3.20993700 | -1.70956100 | -3.16718000 |
| H  | -3.78525100 | -3.26969600 | -2.51845000 |
| H  | -4.35376100 | -1.73079400 | -1.79519200 |

**7+CO<sub>2</sub>**

|                                              |                             |
|----------------------------------------------|-----------------------------|
| Zero-point correction=                       | 0.278956 (Hartree/Particle) |
| Thermal correction to Energy=                | 0.308605                    |
| Thermal correction to Enthalpy=              | 0.309549                    |
| Thermal correction to Gibbs Free Energy=     | 0.212090                    |
| Sum of electronic and zero-point Energies=   | -1855.816340                |
| Sum of electronic and thermal Energies=      | -1855.786691                |
| Sum of electronic and thermal Enthalpies=    | -1855.785747                |
| Sum of electronic and thermal Free Energies= | -1855.883206                |

|    |             |             |             |
|----|-------------|-------------|-------------|
| C  | -1.10901900 | -2.90855800 | 0.54689000  |
| C  | -2.26717700 | -3.12845200 | -0.21361300 |
| C  | -1.09731000 | -3.30036800 | 1.89369200  |
| C  | -3.39923100 | -3.72637000 | 0.35950400  |
| C  | -2.22251200 | -3.89970900 | 2.47872900  |
| C  | -3.35777500 | -4.10605900 | 1.69900600  |
| H  | -2.22050600 | -4.20305500 | 3.51990000  |
| H  | -4.23255000 | -4.57095800 | 2.14665300  |
| C  | 2.09141100  | -4.37958900 | -0.69757200 |
| O  | 0.06069300  | -3.04938100 | 2.57717300  |
| C  | 0.13886600  | -3.45293200 | 3.93430700  |
| H  | 0.00874100  | -4.53719600 | 4.03909000  |
| H  | 1.13942700  | -3.17626900 | 4.27043600  |
| H  | -0.60641000 | -2.93633400 | 4.55207800  |
| O  | 0.97651500  | -3.86855400 | -1.06719900 |
| C  | 2.38674900  | -5.67870700 | -1.48999100 |
| O  | 2.90530200  | -3.98617700 | 0.13130500  |
| Pd | 0.48304200  | -2.06650700 | -0.26241200 |
| O  | -0.19819500 | -0.08172500 | 0.52271400  |
| C  | 4.77826400  | -1.62189200 | -1.19757100 |
| H  | 4.76883900  | -1.33117400 | -2.25145000 |
| H  | 5.72048700  | -1.33717800 | -0.72066700 |
| H  | 4.61044800  | -2.69434900 | -1.08471800 |
| C  | 3.85403500  | 0.91260200  | -0.70503900 |
| H  | 3.06922500  | 1.54265700  | -0.28096900 |
| H  | 4.81214900  | 1.14712600  | -0.23306800 |
| H  | 3.90819700  | 1.05007900  | -1.78830900 |
| S  | 3.42515500  | -0.80090100 | -0.33185300 |
| O  | 2.16386100  | -1.06405600 | -1.20594100 |
| H  | -4.29914200 | -3.89638000 | -0.22125200 |
| O  | -2.21365400 | -2.71867900 | -1.51630600 |
| C  | -3.35145100 | -2.93634600 | -2.33372600 |
| H  | -4.22804000 | -2.39505500 | -1.95604800 |
| H  | -3.08823700 | -2.55129900 | -3.32020700 |
| H  | -3.59085300 | -4.00401000 | -2.41391300 |
| F  | 3.49369600  | -6.28629000 | -1.04786600 |
| F  | 2.56562300  | -5.39951600 | -2.79604200 |
| F  | 1.37053100  | -6.55398400 | -1.39522400 |
| C  | -1.18509600 | 0.10419400  | 1.13890600  |
| O  | -2.14335800 | 0.33980100  | 1.74619600  |

B3PW91/6-31G(d) (SDD for PD) in gas phase

9  
 Zero-point correction= 0.364258 (Hartree/Particle)  
 Thermal correction to Energy= 0.399148  
 Thermal correction to Enthalpy= 0.400092  
 Thermal correction to Gibbs Free Energy= 0.292358  
 Sum of electronic and zero-point Energies= -2408.823741  
 Sum of electronic and thermal Energies= -2408.788851  
 Sum of electronic and thermal Enthalpies= -2408.787907  
 Sum of electronic and thermal Free Energies= -2408.895641

|    |             |             |             |
|----|-------------|-------------|-------------|
| C  | 0.18098700  | 1.67159900  | 2.56198300  |
| C  | -0.17189200 | 1.41636700  | 3.89444800  |
| C  | 0.10777600  | 2.98496900  | 2.07921600  |
| C  | -0.57957400 | 2.45648500  | 4.73847400  |
| C  | -0.30831200 | 4.03129900  | 2.91068300  |
| C  | -0.64252200 | 3.75086100  | 4.23222400  |
| H  | -0.37023800 | 5.04927800  | 2.54372100  |
| H  | -0.96075000 | 4.56143800  | 4.88297800  |
| C  | 1.53944300  | -4.10535400 | -1.15828300 |
| O  | 0.45054200  | 3.15112200  | 0.77095400  |
| C  | 0.38121600  | 4.45062800  | 0.22586500  |
| H  | 1.06266200  | 5.14258600  | 0.73889200  |
| H  | 0.68586300  | 4.35492500  | -0.81813400 |
| H  | -0.63991500 | 4.85301800  | 0.26610400  |
| O  | 0.41968200  | -3.67565400 | -0.70869900 |
| C  | 1.36062300  | -5.48401900 | -1.84392400 |
| O  | 2.64780300  | -3.58522700 | -1.14147400 |
| Pd | 0.27151400  | -1.91570900 | 0.28457800  |
| O  | 1.88982800  | 0.49736800  | 1.38642900  |
| C  | 3.17786000  | -1.07879200 | -2.82307600 |
| H  | 2.51052700  | -0.66511600 | -3.58422900 |
| H  | 4.20298300  | -0.72269200 | -2.96627900 |
| H  | 3.15583000  | -2.16948200 | -2.82753000 |
| C  | 2.68786400  | 1.21519200  | -1.43158600 |
| H  | 2.27880600  | 1.66568900  | -0.52567300 |
| H  | 3.73608000  | 1.50399200  | -1.55915200 |
| H  | 2.09829200  | 1.48403000  | -2.31253300 |
| S  | 2.61309100  | -0.57221000 | -1.18239100 |
| O  | 1.06961500  | -0.86313000 | -1.27175100 |
| H  | -0.84526900 | 2.26694700  | 5.77225800  |
| O  | -0.08030500 | 0.11690100  | 4.28767600  |
| C  | -0.23093300 | -0.17862200 | 5.65938100  |
| H  | -1.24979800 | 0.03235500  | 6.01361700  |
| H  | -0.03113100 | -1.24724700 | 5.75728600  |
| H  | 0.48591200  | 0.38219200  | 6.27348300  |
| F  | 2.53311800  | -6.08213400 | -2.07016300 |
| F  | 0.73937700  | -5.33002800 | -3.03163000 |
| F  | 0.60835200  | -6.31713200 | -1.09972000 |
| C  | 0.69659600  | 0.55765500  | 1.67786300  |
| O  | -0.23436800 | -0.25876800 | 1.29942800  |
| S  | -2.02985700 | -3.33305600 | 1.92668800  |
| O  | -0.52009100 | -3.01063700 | 1.83935000  |
| C  | -2.53548300 | -4.03084500 | 0.33660700  |
| H  | -2.31882700 | -3.32148200 | -0.46665300 |
| H  | -1.94913400 | -4.93795300 | 0.17783300  |
| H  | -3.60365100 | -4.26510300 | 0.38937200  |
| C  | -2.92561000 | -1.76496900 | 1.83291800  |
| H  | -2.59913100 | -1.16029200 | 2.68094300  |
| H  | -2.66791600 | -1.24327600 | 0.90791200  |
| H  | -3.99782100 | -1.97746800 | 1.89522900  |

12

Zero-point correction= 0.21868 (Hartree/Particle)  
 Thermal correction to Energy= 0.309936  
 Thermal correction to Enthalpy= 0.310880  
 Thermal correction to Gibbs Free Energy= 0.217695  
 Sum of electronic and zero-point Energies= -1855.791697  
 Sum of electronic and thermal Energies= -1855.763629  
 Sum of electronic and thermal Enthalpies= -1855.762685  
 Sum of electronic and thermal Free Energies= -1855.855870

|    |             |             |             |
|----|-------------|-------------|-------------|
| C  | -1.81485600 | 0.48215600  | -0.70357600 |
| C  | -1.90296900 | 1.40465400  | 0.34558900  |
| C  | -2.40171100 | 0.79150800  | -1.94017000 |
| C  | -2.57568100 | 2.62011800  | 0.17356100  |
| C  | -3.07870500 | 2.00341500  | -2.12219000 |
| C  | -3.15644600 | 2.89946900  | -1.06022000 |
| C  | -3.54250900 | 2.24693600  | -3.07114200 |
| H  | -3.68212800 | 3.84098200  | -1.19795900 |
| C  | 0.51572100  | -4.83742100 | -2.18388600 |
| O  | 1.52131300  | -4.69727400 | -1.43139900 |
| C  | 0.30517300  | -6.15712800 | -2.93562000 |
| O  | -0.29635800 | -3.88476200 | -2.35842800 |
| Pd | 0.87054500  | -2.71975300 | -1.07722900 |
| O  | 0.03866900  | -0.91223100 | -1.05301100 |
| C  | 3.32511000  | -0.66400400 | 2.12894500  |
| H  | 4.27645200  | -0.77662500 | 1.60249000  |
| H  | 3.29880000  | 0.26834600  | 2.70080700  |
| H  | 3.16570700  | -1.51390600 | 2.79635400  |
| C  | 2.50223500  | 0.71617400  | -0.10003900 |
| H  | 1.79310700  | 0.75003700  | -0.92913300 |
| H  | 2.44475700  | 1.63980300  | 0.48435100  |
| H  | 3.51910400  | 0.53541100  | -0.45922500 |
| S  | 1.96874700  | -0.66450900 | 0.93706400  |
| O  | 2.33324500  | -1.95758600 | 0.12787100  |
| H  | -2.64766600 | 3.34042200  | 0.98050000  |
| F  | 0.79741800  | -7.18342300 | -2.23797600 |
| F  | 0.94399400  | -6.10080800 | -4.11620600 |
| F  | -0.99106000 | -6.37268900 | -3.16660200 |
| C  | -1.15958800 | -0.86248000 | -0.49940600 |
| O  | -1.69619600 | -1.76900300 | 0.10866500  |
| O  | -2.27158100 | -0.15982400 | -2.89619900 |
| O  | -1.27879700 | 1.04255700  | 1.50263200  |
| C  | -2.88796000 | 0.05194500  | -4.14845300 |
| H  | -3.97525200 | 0.16806400  | -4.04779500 |
| H  | -2.47412500 | 0.93241700  | -4.65837700 |
| H  | -2.67319400 | -0.84022500 | -4.73862400 |
| C  | -1.52527100 | 1.81623200  | 2.65715600  |
| H  | -1.04118300 | 1.28888300  | 3.48178000  |
| H  | -1.09744500 | 2.82537900  | 2.57374200  |
| H  | -2.60000000 | 1.89781900  | 2.86376000  |



## 12a

Zero-point correction= 0.281894 (Hartree/Particle)  
 Thermal correction to Energy= 0.309953  
 Thermal correction to Enthalpy= 0.310897  
 Thermal correction to Gibbs Free Energy= 0.217190  
 Sum of electronic and zero-point Energies= -1855.789082  
 Sum of electronic and thermal Energies= -1855.761022  
 Sum of electronic and thermal Enthalpies= -1855.760078  
 Sum of electronic and thermal Free Energies= -1855.853786

|    |             |             |             |
|----|-------------|-------------|-------------|
| C  | -1.40432000 | -1.73618700 | 1.21986000  |
| C  | -2.64861500 | -2.29784600 | 0.90064100  |
| C  | -0.73722300 | -2.15762700 | 2.37692800  |
| C  | -3.21570900 | -3.27866500 | 1.72255200  |
| C  | -1.29473300 | -3.13644700 | 3.20607100  |
| C  | -2.52987800 | -3.68146400 | 2.86400400  |
| H  | -0.78519200 | -3.47218800 | 4.10183700  |
| H  | -2.96796500 | -4.44272800 | 3.50452600  |
| C  | 0.06337200  | -5.05725700 | -1.23438200 |
| O  | 0.46618700  | -1.55768900 | 2.60746700  |
| C  | 1.16142900  | -1.90175000 | 3.78690400  |
| H  | 1.44771200  | -2.96195700 | 3.79413500  |
| H  | 2.06313900  | -1.28619800 | 3.79490900  |
| H  | 0.56778800  | -1.67968500 | 4.68332500  |
| O  | 1.29373400  | -4.78150800 | -1.15102100 |
| C  | -0.37552000 | -6.51272400 | -1.43419100 |
| O  | -0.81010300 | -4.15274900 | -1.11166000 |
| Pd | 0.74911700  | -2.77472700 | -0.80224200 |
| O  | -0.00955900 | -0.96322300 | -0.60049000 |
| C  | 4.34017200  | -0.13395700 | 0.03697300  |
| H  | 4.85715400  | -0.43000800 | -0.87941700 |
| H  | 4.54902100  | 0.91045200  | 0.28746600  |
| H  | 4.64604600  | -0.78170500 | 0.86149100  |
| C  | 2.32902300  | 0.68389000  | -1.64058000 |
| H  | 1.27461200  | 0.58944700  | -1.90431100 |
| H  | 2.55984400  | 1.72146500  | -1.37934500 |
| H  | 2.97629100  | 0.32304300  | -2.44470300 |
| S  | 2.55722700  | -0.34335500 | -0.17156400 |
| O  | 2.55369100  | -1.83246800 | -0.68119900 |
| H  | -4.17352000 | -3.72448700 | 1.48099100  |
| O  | -3.22064900 | -1.82421300 | -0.23309000 |
| C  | -4.44271400 | -2.39204300 | -0.65523300 |
| H  | -5.24027900 | -2.22452600 | 0.08102600  |
| H  | -4.70093900 | -1.88331600 | -1.58551800 |
| H  | -4.33919200 | -3.46787300 | -0.84593800 |
| F  | -0.45779300 | -7.11935800 | -0.23948700 |
| F  | 0.50827300  | -7.17496100 | -2.18500900 |
| F  | -1.57239300 | -6.57295400 | -2.02273600 |
| C  | -0.84248900 | -0.62129700 | 0.37341600  |
| O  | -1.13216500 | 0.54292100  | 0.56101300  |

## TS-1

Zero-point correction= 0.281333 (Hartree/Particle)  
 Thermal correction to Energy= 0.308889  
 Thermal correction to Enthalpy= 0.309833  
 Thermal correction to Gibbs Free Energy= 0.219028  
 Sum of electronic and zero-point Energies= -1855.782378  
 Sum of electronic and thermal Energies= -1855.754822  
 Sum of electronic and thermal Enthalpies= -1855.753877  
 Sum of electronic and thermal Free Energies= -1855.844682

|    |             |             |             |
|----|-------------|-------------|-------------|
| Pd | -0.32446700 | 0.12968000  | -0.42899600 |
| S  | -3.26796400 | -0.85917700 | -0.50740000 |
| F  | 4.31609400  | -0.84949500 | -1.56416000 |
| F  | 3.11333600  | -2.59237400 | -2.04681300 |
| F  | 3.66246900  | -2.18533900 | 0.01573200  |
| O  | 1.12862300  | -1.28232900 | -0.21033200 |
| O  | -1.87080300 | -1.18993700 | 0.10760800  |
| O  | -1.71833700 | 1.50002100  | -0.69339200 |
| O  | 1.86746000  | 0.26032200  | -1.62728600 |
| O  | -2.06159800 | 3.60711100  | -0.03087900 |
| C  | 2.01469200  | -0.79176400 | -0.98998100 |
| C  | 3.30460700  | -1.61578200 | -1.14200300 |
| C  | -4.09346800 | -2.45572100 | -0.32378800 |
| C  | -4.16768400 | 0.07053500  | 0.75473200  |
| C  | -1.34435300 | 2.63677700  | -0.13712400 |
| H  | -5.14397600 | -2.35364200 | -0.61202500 |
| H  | -3.58939600 | -3.15491900 | -0.99467800 |
| H  | -3.99942100 | -2.79874600 | 0.70990900  |
| H  | -5.22136700 | 0.12616200  | 0.46303100  |
| H  | -4.05136600 | -0.42285200 | 1.72369100  |
| H  | -3.73092500 | 1.07069100  | 0.77021800  |
| C  | 0.08370200  | 2.58299600  | 0.37635400  |
| C  | 0.33005100  | 2.33781900  | 1.74822000  |
| C  | 1.15520700  | 2.97886700  | -0.45542100 |
| C  | 1.62448800  | 2.42330900  | 2.26176400  |
| C  | 2.45403100  | 3.06289500  | 0.06057200  |
| C  | 2.66535600  | 2.78371300  | 1.40507100  |
| H  | 1.83034600  | 2.21973600  | 3.30586300  |
| H  | 3.28783200  | 3.33588500  | -0.57473400 |
| H  | 3.67475900  | 2.84681200  | 1.80360500  |
| O  | 0.81923800  | 3.26445400  | -1.72755700 |
| O  | -0.76547200 | 2.02477500  | 2.48222700  |
| C  | 1.85930800  | 3.46140300  | -2.67154100 |
| H  | 2.51456100  | 2.58491300  | -2.71161500 |
| H  | 1.36063200  | 3.59357400  | -3.63267200 |
| H  | 2.44065700  | 4.36316100  | -2.43998500 |
| C  | -0.59066900 | 1.74760100  | 3.85809000  |
| H  | -1.58747900 | 1.53594900  | 4.24818200  |
| H  | 0.05393900  | 0.87269900  | 4.01133200  |
| H  | -0.17122300 | 2.61127900  | 4.38946100  |

## 13

|                                              |                             |
|----------------------------------------------|-----------------------------|
| Zero-point correction=                       | 0.281791 (Hartree/Particle) |
| Thermal correction to Energy=                | 0.309901                    |
| Thermal correction to Enthalpy=              | 0.310845                    |
| Thermal correction to Gibbs Free Energy=     | 0.218874                    |
| Sum of electronic and zero-point Energies=   | -1855.801650                |
| Sum of electronic and thermal Energies=      | -1855.773540                |
| Sum of electronic and thermal Enthalpies=    | -1855.772596                |
| Sum of electronic and thermal Free Energies= | -1855.864567                |

|    |             |             |             |
|----|-------------|-------------|-------------|
| C  | -1.49715400 | -2.05012500 | 0.80131200  |
| C  | -2.40082200 | -2.59640600 | -0.17233700 |
| C  | -1.07635500 | -2.89352500 | 1.88565400  |
| C  | -2.73748300 | -3.94936300 | -0.14170400 |
| C  | -1.41827700 | -4.24721800 | 1.90006600  |
| C  | -2.23146000 | -4.74444900 | 0.88512000  |
| H  | -1.06582900 | -4.90724400 | 2.68317400  |
| H  | -2.48852000 | -5.80048500 | 0.89739900  |
| C  | 1.80616300  | -4.47332000 | -0.40724600 |
| O  | -0.37423300 | -2.27571300 | 2.84375600  |
| C  | 0.28050600  | -3.06594400 | 3.82693100  |
| H  | 0.97466900  | -3.77159400 | 3.35659300  |
| H  | 0.83494600  | -2.35999400 | 4.44555800  |
| H  | -0.44428500 | -3.60355500 | 4.44948900  |
| O  | 0.70193400  | -3.97511800 | -0.82072100 |
| C  | 1.97413000  | -5.94211900 | -0.86993900 |
| O  | 2.68046300  | -3.96306900 | 0.28962400  |
| Pd | 0.33391200  | -2.04626800 | -0.30957200 |
| O  | -0.21900600 | -0.20651400 | 0.26466000  |
| C  | 4.67272600  | -1.84057100 | -0.92720300 |
| H  | 4.75493300  | -1.64970600 | -2.00085500 |
| H  | 5.55222800  | -1.47147800 | -0.39073000 |
| H  | 4.52326800  | -2.90384800 | -0.72751600 |
| C  | 3.58169500  | 0.68453900  | -0.76871900 |
| H  | 2.70482100  | 1.28326400  | -0.51053100 |
| H  | 4.45323300  | 1.03605300  | -0.20776400 |
| H  | 3.76188300  | 0.72956100  | -1.84635000 |
| S  | 3.20159100  | -1.01609000 | -0.28547100 |
| O  | 2.08432600  | -1.41799200 | -1.29390400 |
| H  | -3.37851200 | -4.38654800 | -0.89742900 |
| O  | -2.87227700 | -1.71240800 | -1.06071100 |
| C  | -3.66236900 | -2.18466200 | -2.14153500 |
| H  | -4.59495300 | -2.63432300 | -1.78063700 |
| H  | -3.89148800 | -1.30402300 | -2.74180600 |
| H  | -3.10528800 | -2.91007800 | -2.74583700 |
| F  | 3.21460700  | -6.38866100 | -0.64142400 |
| F  | 1.72139500  | -6.08000300 | -2.18107700 |
| F  | 1.11926300  | -6.74099100 | -0.19973900 |
| C  | -1.31754800 | -0.51594600 | 0.90803100  |
| O  | -2.07928800 | 0.21798000  | 1.49101100  |

## TS-2

|                                              |                             |
|----------------------------------------------|-----------------------------|
| Zero-point correction=                       | 0.279373 (Hartree/Particle) |
| Thermal correction to Energy=                | 0.307685                    |
| Thermal correction to Enthalpy=              | 0.308629                    |
| Thermal correction to Gibbs Free Energy=     | 0.215700                    |
| Sum of electronic and zero-point Energies=   | -1855.783198                |
| Sum of electronic and thermal Energies=      | -1855.754886                |
| Sum of electronic and thermal Enthalpies=    | -1855.753942                |
| Sum of electronic and thermal Free Energies= | -1855.846871                |

|    |             |             |             |
|----|-------------|-------------|-------------|
| C  | -1.32767100 | -2.55752400 | 0.63614500  |
| C  | -2.45963000 | -2.74675100 | -0.20118100 |
| C  | -1.30668200 | -3.22042300 | 1.89232900  |
| C  | -3.55360600 | -3.50257400 | 0.22621500  |
| C  | -2.39845500 | -3.97558000 | 2.32662100  |
| C  | -3.50109500 | -4.09947800 | 1.48397300  |
| H  | -2.39994700 | -4.46954000 | 3.29136300  |
| H  | -4.35150200 | -4.68854600 | 1.81908900  |
| C  | 1.92472100  | -4.25196800 | -0.69861800 |
| O  | 0.78630900  | -3.72638000 | -0.95205800 |
| C  | 2.04484500  | -5.65271700 | -1.35065000 |
| O  | 2.86647700  | -3.81732400 | -0.04102400 |
| Pd | 0.38690100  | -1.90910600 | -0.16831300 |
| O  | -0.36923400 | -0.16566400 | 0.69517000  |
| C  | 4.72319600  | -1.65530000 | -1.10993700 |
| H  | 4.69026000  | -1.24009800 | -2.12125400 |
| H  | 5.68146700  | -1.44249200 | -0.62592500 |
| H  | 4.53263300  | -2.72988300 | -1.11628600 |
| C  | 3.88433200  | 0.81129000  | -0.28229300 |
| H  | 3.11247300  | 1.40641100  | 0.21153700  |
| H  | 4.84717800  | 0.96749600  | 0.21397900  |
| H  | 3.93997600  | 1.08309100  | -1.34020200 |
| S  | 3.39399800  | -0.92684700 | -0.12599700 |
| O  | 2.13673200  | -1.00107700 | -1.02834500 |
| H  | -4.42890000 | -3.63911400 | -0.39829700 |
| F  | 1.16401100  | -6.50842100 | -0.80036500 |
| F  | 3.27070400  | -6.16573300 | -1.18782900 |
| F  | 1.79600400  | -5.59780200 | -2.67067600 |
| C  | -1.43853500 | -0.52621500 | 1.17610800  |
| O  | -2.42095400 | -0.24685800 | 1.76390300  |
| O  | -2.39879800 | -2.12635200 | -1.39794300 |
| O  | -0.18433700 | -3.03785400 | 2.62052300  |
| C  | -0.09332300 | -3.64473500 | 3.89729300  |
| H  | -0.15841000 | -4.73707500 | 3.82281400  |
| H  | 0.88778600  | -3.36769500 | 4.28494100  |
| H  | -0.87338100 | -3.27358100 | 4.57420500  |
| C  | -3.49720400 | -2.24720900 | -2.28418900 |
| H  | -3.22395100 | -1.67443100 | -3.17123200 |
| H  | -3.66596700 | -3.29393500 | -2.56503700 |
| H  | -4.41280900 | -1.82972900 | -1.84633600 |

**7+CO<sub>2</sub>**

|                                              |                             |
|----------------------------------------------|-----------------------------|
| Zero-point correction=                       | 0.279339 (Hartree/Particle) |
| Thermal correction to Energy=                | 0.308938                    |
| Thermal correction to Enthalpy=              | 0.309882                    |
| Thermal correction to Gibbs Free Energy=     | 0.211967                    |
| Sum of electronic and zero-point Energies=   | -1855.790716                |
| Sum of electronic and thermal Energies=      | -1855.761117                |
| Sum of electronic and thermal Enthalpies=    | -1855.760173                |
| Sum of electronic and thermal Free Energies= | -1855.858088                |

|    |             |             |             |
|----|-------------|-------------|-------------|
| C  | -1.13682000 | -2.82065200 | 0.58420800  |
| C  | -2.24716500 | -3.11495800 | -0.21855900 |
| C  | -1.15971700 | -3.18586000 | 1.93582000  |
| C  | -3.36414000 | -3.76959800 | 0.31863700  |
| C  | -2.27008100 | -3.84034700 | 2.48622000  |
| C  | -3.35619500 | -4.12718500 | 1.66410700  |
| H  | -2.29383600 | -4.12597400 | 3.53233700  |
| H  | -4.21973700 | -4.63746100 | 2.08343400  |
| C  | 2.05096600  | -4.26543200 | -0.80313300 |
| O  | -0.04790000 | -2.84515900 | 2.65994200  |
| C  | 0.06027700  | -3.33244200 | 3.98082000  |
| H  | -0.00752000 | -4.42768100 | 4.01181600  |
| H  | 1.04597500  | -3.02340200 | 4.33414600  |
| H  | -0.70904700 | -2.90467400 | 4.63891300  |
| O  | 0.88028400  | -3.79185100 | -1.00881200 |
| C  | 2.21200600  | -5.64546100 | -1.49135400 |
| O  | 2.99753500  | -3.79281600 | -0.18039600 |
| Pd | 0.46938400  | -1.98740800 | -0.19584700 |
| O  | -0.17472000 | -0.02436600 | 0.67699900  |
| C  | 4.72337000  | -1.63271900 | -1.43412100 |
| H  | 4.59312100  | -1.20055600 | -2.43039300 |
| H  | 5.72730500  | -1.43556800 | -1.04537800 |
| H  | 4.52524500  | -2.70569600 | -1.43767400 |
| C  | 4.01882800  | 0.82256700  | -0.47862400 |
| H  | 3.31637700  | 1.42451600  | 0.10275400  |
| H  | 5.03003200  | 0.94683700  | -0.07896300 |
| H  | 3.97500900  | 1.11783400  | -1.53085200 |
| S  | 3.50632500  | -0.90912800 | -0.30980000 |
| O  | 2.16362300  | -0.93571400 | -1.07772100 |
| H  | -4.22717700 | -4.00169100 | -0.29595800 |
| O  | -2.16115300 | -2.71270600 | -1.51878300 |
| C  | -3.16472900 | -3.13780700 | -2.41583600 |
| H  | -4.14294700 | -2.69971100 | -2.17251200 |
| H  | -2.85188000 | -2.78789500 | -3.40136400 |
| H  | -3.25211200 | -4.23202400 | -2.43113200 |
| F  | 3.44389600  | -6.13862800 | -1.31350500 |
| F  | 1.99901000  | -5.54567000 | -2.81612600 |
| F  | 1.33530900  | -6.53475600 | -0.99718100 |
| C  | -1.19183200 | 0.10212800  | 1.25986100  |
| O  | -2.17442700 | 0.30756500  | 1.83963600  |

**BENZENE SYSTEM**  
 B3LYP/6-31G(d) (SDD for PD)  
 in DCM

9

Zero-point correction= 0.297323 (Hartree/Particle)  
 Thermal correction to Energy= 0.327114  
 Thermal correction to Enthalpy= 0.328059  
 Thermal correction to Gibbs Free Energy= 0.231761  
 Sum of electronic and zero-point Energies= -2180.512623  
 Sum of electronic and thermal Energies= -2180.482832  
 Sum of electronic and thermal Enthalpies= -2180.481887  
 Sum of electronic and thermal Free Energies= -2180.578185

|    |             |             |             |
|----|-------------|-------------|-------------|
| C  | -3.96876200 | -0.08156100 | -0.29271300 |
| C  | -4.46379200 | 0.97236000  | 0.48894100  |
| C  | -4.86995300 | -0.92658000 | -0.95606900 |
| C  | -5.83951100 | 1.17567100  | 0.60479500  |
| C  | -6.24463300 | -0.72311700 | -0.84030300 |
| C  | -6.73225600 | 0.32894900  | -0.05902100 |
| C  | -6.93541600 | -1.38304400 | -1.35811400 |
| H  | -7.80336200 | 0.48846700  | 0.03184900  |
| C  | 3.03903400  | -0.57000800 | -0.44046400 |
| O  | 2.32829600  | 0.29661900  | 0.18303800  |
| C  | 4.54968600  | -0.24225700 | -0.29068200 |
| O  | 2.69821800  | -1.55868900 | -1.08486100 |
| Pd | 0.28404700  | 0.27302900  | 0.10525300  |
| O  | -2.08559700 | -1.27631300 | -1.14762700 |
| C  | 1.45064800  | -3.87361500 | 0.87258800  |
| H  | 1.33316000  | -3.91338600 | 1.95819000  |
| H  | 1.38109800  | -4.87289500 | 0.43368100  |
| H  | 2.39582400  | -3.40721000 | 0.59242100  |
| C  | -1.31080200 | -3.71719100 | 0.79972900  |
| H  | -2.17901200 | -3.15321900 | 0.45805400  |
| H  | -1.32425600 | -4.72485700 | 0.37514100  |
| H  | -1.26024700 | -3.75267900 | 1.89056400  |
| S  | 0.14159900  | -2.84209900 | 0.15413600  |
| O  | 0.19926700  | -1.54629500 | 1.06642200  |
| H  | -6.21558400 | 1.99421700  | 1.21255900  |
| F  | 5.31620300  | -1.06370600 | -1.02279700 |
| F  | 4.93605000  | -0.35627600 | 0.99918300  |
| F  | 4.81277300  | 1.02518800  | -0.68282100 |
| C  | -2.48989300 | -0.33647800 | -0.44449800 |
| O  | -1.72818600 | 0.48875500  | 0.21412100  |
| S  | 0.64727300  | 3.47172500  | -0.33218800 |
| O  | 0.37590900  | 2.05466800  | -0.94228200 |
| C  | 2.15801900  | 3.37880300  | 0.67462900  |
| H  | 2.02979200  | 2.65108000  | 1.47778400  |
| H  | 2.97255200  | 3.07000700  | 0.01808200  |
| H  | 2.34238600  | 4.38204100  | 1.06918000  |
| C  | -0.55993700 | 3.72306800  | 1.00168600  |
| H  | -1.55018100 | 3.74822900  | 0.54406500  |
| H  | -0.48965500 | 2.90277200  | 1.72014400  |
| H  | -0.33918000 | 4.68352600  | 1.47585400  |
| H  | -3.76689900 | 1.62581900  | 1.00240700  |
| H  | -4.47471100 | -1.73728600 | -1.55894700 |

12

Zero-point correction= 0.215284 (Hartree/Particle)  
 Thermal correction to Energy= 0.238129  
 Thermal correction to Enthalpy= 0.239073  
 Thermal correction to Gibbs Free Energy= 0.157434  
 Sum of electronic and zero-point Energies= -1627.367599  
 Sum of electronic and thermal Energies= -1627.344754  
 Sum of electronic and thermal Enthalpies= -1627.343810  
 Sum of electronic and thermal Free Energies= -1627.425449

|    |             |             |             |
|----|-------------|-------------|-------------|
| C  | -1.83786700 | 0.42476200  | -0.35832100 |
| C  | -2.65931200 | 0.85159800  | 0.69514200  |
| C  | -1.79346400 | 1.17193600  | -1.54471700 |
| C  | -3.42139300 | 2.01192700  | 0.56763700  |
| C  | -2.55952600 | 2.33118400  | -1.67217000 |
| C  | -3.37273200 | 2.75392500  | -0.61665200 |
| H  | -2.52323300 | 2.90381700  | -2.59480500 |
| H  | -3.96807200 | 3.65739300  | -0.71715200 |
| C  | 0.25886000  | -5.21280400 | -1.30304500 |
| O  | 1.46459300  | -4.85446800 | -1.16149900 |
| C  | -0.06625000 | -6.69922700 | -1.51313400 |
| O  | -0.67582700 | -4.35824300 | -1.31626300 |
| Pd | 0.78016400  | -2.83337600 | -1.07838300 |
| O  | -0.20404400 | -1.08845800 | -1.16731100 |
| C  | 4.22853000  | -0.27648100 | 0.34365900  |
| H  | 4.91372500  | -0.50281900 | -0.47633500 |
| H  | 4.39849000  | 0.73019900  | 0.73403700  |
| H  | 4.32737300  | -1.01074600 | 1.14519000  |
| C  | 2.59665300  | 0.80910600  | -1.62817000 |
| H  | 1.62827700  | 0.75978100  | -2.12792400 |
| H  | 2.75611300  | 1.80763000  | -1.21223400 |
| H  | 3.40520400  | 0.53053700  | -2.30802800 |
| S  | 2.52086000  | -0.37257700 | -0.25453100 |
| O  | 2.53425400  | -1.79720200 | -0.95439100 |
| H  | -4.05380900 | 2.33721600  | 1.38903700  |
| F  | 0.76857500  | -7.46956400 | -0.80252200 |
| F  | 0.07767100  | -7.00640600 | -2.81625200 |
| F  | -1.32493700 | -6.97213800 | -1.14911600 |
| C  | -1.03499000 | -0.83398500 | -0.17588000 |
| O  | -1.16095300 | -1.53853400 | 0.82759100  |
| H  | -2.68869900 | 0.26217100  | 1.60540400  |
| H  | -1.16546700 | 0.83790000  | -2.36346900 |

## 12a

Zero-point correction= 0.215090 (Hartree/Particle)  
 Thermal correction to Energy= 0.237944  
 Thermal correction to Enthalpy= 0.238888  
 Thermal correction to Gibbs Free Energy= 0.158227  
 Sum of electronic and zero-point Energies= -1627.357824  
 Sum of electronic and thermal Energies= -1627.334970  
 Sum of electronic and thermal Enthalpies= -1627.334026  
 Sum of electronic and thermal Free Energies= -1627.414688

|    |             |             |             |
|----|-------------|-------------|-------------|
| C  | -1.66423600 | -1.76809900 | 1.03635900  |
| C  | -3.04796200 | -1.94658500 | 1.18498400  |
| C  | -0.79122100 | -2.40139500 | 1.93396600  |
| C  | -3.54993600 | -2.77444200 | 2.18805700  |
| C  | -1.29626800 | -3.21142400 | 2.95350400  |
| C  | -2.67413800 | -3.40797300 | 3.07560200  |
| H  | -0.61356700 | -3.68559200 | 3.65317500  |
| H  | -3.06485900 | -4.04577600 | 3.86364600  |
| C  | 0.29633300  | -5.18888500 | -1.30816300 |
| O  | 1.51267300  | -4.84195300 | -1.25434400 |
| C  | -0.06806100 | -6.63754900 | -1.66486600 |
| O  | -0.62773300 | -4.34447100 | -1.11633400 |
| Pd | 0.86273600  | -2.85064600 | -0.86563500 |
| O  | -0.03265200 | -1.07510400 | -0.64771900 |
| C  | 4.49418800  | -0.33558800 | 0.23782200  |
| H  | 5.03431900  | -0.51221500 | -0.69490000 |
| H  | 4.71124500  | 0.65835900  | 0.63763800  |
| H  | 4.73923900  | -1.09916200 | 0.97825500  |
| C  | 2.54045500  | 0.78822000  | -1.38873000 |
| H  | 1.50215000  | 0.73547600  | -1.71818700 |
| H  | 2.75707200  | 1.77355600  | -0.96693800 |
| H  | 3.22810000  | 0.54683100  | -2.20273100 |
| S  | 2.71146200  | -0.44435900 | -0.06825400 |
| O  | 2.63965200  | -1.84613700 | -0.81200800 |
| H  | -4.62230600 | -2.92018800 | 2.28309800  |
| F  | 0.90142700  | -7.48003000 | -1.28703700 |
| F  | -0.22684300 | -6.73980400 | -2.99791100 |
| F  | -1.21349800 | -6.99983200 | -1.07283000 |
| C  | -1.18350800 | -0.83432400 | -0.03983900 |
| O  | -1.84136600 | 0.16014900  | -0.33693500 |
| H  | -3.71933000 | -1.43296500 | 0.50412300  |
| H  | 0.28018200  | -2.24432500 | 1.85430400  |

## TS-1

Zero-point correction= 0.214616 (Hartree/Particle)  
 Thermal correction to Energy= 0.236890  
 Thermal correction to Enthalpy= 0.237834  
 Thermal correction to Gibbs Free Energy= 0.157926  
 Sum of electronic and zero-point Energies= -1627.350897  
 Sum of electronic and thermal Energies= -1627.328624  
 Sum of electronic and thermal Enthalpies= -1627.327680  
 Sum of electronic and thermal Free Energies= -1627.407588

|    |             |             |             |
|----|-------------|-------------|-------------|
| C  | -1.10997500 | -0.60409700 | -2.54915500 |
| C  | -1.04018100 | -0.50413000 | -3.94528500 |
| C  | -2.00198300 | -1.52180100 | -1.96068500 |
| C  | -1.82448500 | -1.33422200 | -4.74419800 |
| C  | -2.79031300 | -2.34992600 | -2.76820100 |
| C  | -2.69557800 | -2.26146700 | -4.15735300 |
| H  | -3.48192600 | -3.04832200 | -2.30714100 |
| H  | -3.30707800 | -2.90281200 | -4.78542900 |
| C  | -0.63349700 | -4.72933400 | -0.03836300 |
| O  | 0.52638500  | -4.31674400 | -0.40611400 |
| C  | -0.73426200 | -6.26141800 | 0.11553400  |
| O  | -1.61105500 | -4.00482900 | 0.17392500  |
| Pd | 0.31974200  | -2.29120800 | -0.52552600 |
| O  | 0.18760100  | -0.29271700 | -0.56368200 |
| C  | 4.56377100  | -1.40070600 | 0.83185600  |
| H  | 5.10319700  | -1.81195900 | -0.02403300 |
| H  | 5.10890800  | -0.56476000 | 1.27796800  |
| H  | 4.38155600  | -2.17279800 | 1.58154000  |
| C  | 3.45218500  | 0.33600900  | -1.03310400 |
| H  | 2.54205000  | 0.77594300  | -1.44650200 |
| H  | 4.07752400  | 1.11538200  | -0.58829100 |
| H  | 4.00495000  | -0.22488400 | -1.79094700 |
| S  | 2.94203900  | -0.79461800 | 0.29247500  |
| O  | 2.38543700  | -2.08258600 | -0.45072400 |
| H  | -1.76048800 | -1.26020700 | -5.82600800 |
| F  | 0.17912900  | -6.70857400 | 0.99942300  |
| F  | -0.49902700 | -6.86732500 | -1.06556500 |
| F  | -1.94831300 | -6.63247500 | 0.54212200  |
| C  | -0.22053500 | 0.25351600  | -1.69766900 |
| O  | 0.11958700  | 1.38417000  | -2.03426200 |
| H  | -0.36340100 | 0.21944500  | -4.38866100 |
| H  | -2.14945800 | -1.53308500 | -0.88275900 |

## 13

|                                              |                             |
|----------------------------------------------|-----------------------------|
| Zero-point correction=                       | 0.215067 (Hartree/Particle) |
| Thermal correction to Energy=                | 0.237850                    |
| Thermal correction to Enthalpy=              | 0.238794                    |
| Thermal correction to Gibbs Free Energy=     | 0.158850                    |
| Sum of electronic and zero-point Energies=   | -1627.362869                |
| Sum of electronic and thermal Energies=      | -1627.340086                |
| Sum of electronic and thermal Enthalpies=    | -1627.339141                |
| Sum of electronic and thermal Free Energies= | -1627.419085                |

|    |             |             |             |
|----|-------------|-------------|-------------|
| C  | -1.81495300 | -1.83510400 | 0.86140300  |
| C  | -2.84837600 | -2.17390600 | -0.04513900 |
| C  | -1.18475300 | -2.86030700 | 1.62804000  |
| C  | -3.23004600 | -3.49553900 | -0.18807000 |
| C  | -1.60996900 | -4.20353900 | 1.47400600  |
| C  | -2.60868800 | -4.51399300 | 0.57033100  |
| H  | -1.15719800 | -4.97614500 | 2.08736300  |
| H  | -2.93649500 | -5.54240400 | 0.45361000  |
| C  | 1.83227500  | -4.47728200 | -0.33476800 |
| O  | 0.78469000  | -3.86056400 | -0.74685300 |
| C  | 2.16431000  | -5.75722800 | -1.14223100 |
| O  | 2.60593200  | -4.17329300 | 0.57277500  |
| Pd | 0.41639600  | -2.06084500 | 0.13823400  |
| O  | -0.09486000 | -0.27540900 | 0.93554500  |
| C  | 4.68916000  | -2.00200400 | -0.81073500 |
| H  | 4.69815300  | -1.72653800 | -1.86799700 |
| H  | 5.64942600  | -1.78133100 | -0.33675900 |
| H  | 4.43371800  | -3.05447800 | -0.67921400 |
| C  | 3.89797500  | 0.62905200  | -0.42273800 |
| H  | 3.14538700  | 1.30890900  | -0.01884600 |
| H  | 4.87254300  | 0.83892500  | 0.02579800  |
| H  | 3.94156100  | 0.70426000  | -1.51191300 |
| S  | 3.40196600  | -1.05212200 | 0.04575400  |
| O  | 2.11344800  | -1.29399300 | -0.83432100 |
| H  | -4.02389300 | -3.75513400 | -0.88212700 |
| F  | 1.22512800  | -6.08761300 | -2.04273300 |
| F  | 2.33141800  | -6.80569600 | -0.31388800 |
| F  | 3.32665600  | -5.57020500 | -1.80771200 |
| C  | -1.39830800 | -0.39416700 | 1.07832700  |
| O  | -2.17862900 | 0.51080700  | 1.32285200  |
| H  | -3.33593400 | -1.38466300 | -0.60847300 |
| H  | -0.54905700 | -2.59927000 | 2.47093500  |

## TS-2

|                                              |                             |
|----------------------------------------------|-----------------------------|
| Zero-point correction=                       | 0.212171 (Hartree/Particle) |
| Thermal correction to Energy=                | 0.235316                    |
| Thermal correction to Enthalpy=              | 0.236260                    |
| Thermal correction to Gibbs Free Energy=     | 0.154531                    |
| Sum of electronic and zero-point Energies=   | -1627.333431                |
| Sum of electronic and thermal Energies=      | -1627.310286                |
| Sum of electronic and thermal Enthalpies=    | -1627.309342                |
| Sum of electronic and thermal Free Energies= | -1627.391070                |

|    |             |             |             |
|----|-------------|-------------|-------------|
| C  | -1.34380800 | -2.48815600 | 0.59848100  |
| C  | -2.39619000 | -2.65903700 | -0.33633200 |
| C  | -1.34686100 | -3.26986400 | 1.78179100  |
| C  | -3.41875700 | -3.57048100 | -0.08942800 |
| C  | -2.37104500 | -4.18023000 | 2.02318600  |
| C  | -3.40481000 | -4.32738900 | 1.08888800  |
| H  | -2.37089000 | -4.77462500 | 2.93219500  |
| H  | -4.20609500 | -5.03523600 | 1.28195000  |
| C  | 1.94700300  | -4.29718300 | -0.48194800 |
| O  | 0.91788500  | -3.69741000 | -0.95380100 |
| C  | 2.34436300  | -5.56701300 | -1.27727600 |
| O  | 2.67256400  | -3.98724900 | 0.46358100  |
| Pd | 0.46931800  | -1.87341300 | -0.13505300 |
| O  | -0.29378200 | -0.13661200 | 0.69477800  |
| C  | 4.81257300  | -1.91121900 | -0.99581200 |
| H  | 4.84063500  | -1.56679500 | -2.03264400 |
| H  | 5.78148500  | -1.77081400 | -0.50885700 |
| H  | 4.51042900  | -2.95751100 | -0.93758500 |
| C  | 4.18686800  | 0.71708500  | -0.42414700 |
| H  | 3.47314500  | 1.41873000  | 0.01220600  |
| H  | 5.16398200  | 0.83350800  | 0.05218700  |
| H  | 4.25647900  | 0.86393900  | -1.50489800 |
| S  | 3.56580400  | -0.95554500 | -0.08243000 |
| O  | 2.27543400  | -1.04179900 | -0.96911800 |
| H  | -4.22524100 | -3.69442400 | -0.80623700 |
| F  | 1.42263800  | -5.95830000 | -2.17212800 |
| F  | 2.57646900  | -6.59929400 | -0.44500300 |
| F  | 3.49294300  | -5.32062300 | -1.95299200 |
| C  | -1.36801500 | -0.54942900 | 1.15415000  |
| O  | -2.33919800 | -0.23893500 | 1.75942400  |
| H  | -2.40955100 | -2.06441600 | -1.24601500 |
| H  | -0.54879300 | -3.14747600 | 2.50913800  |

**7+CO<sub>2</sub>**

|                                              |                             |
|----------------------------------------------|-----------------------------|
| Zero-point correction=                       | 0.212199 (Hartree/Particle) |
| Thermal correction to Energy=                | 0.236784                    |
| Thermal correction to Enthalpy=              | 0.237728                    |
| Thermal correction to Gibbs Free Energy=     | 0.150894                    |
| Sum of electronic and zero-point Energies=   | -1627.356574                |
| Sum of electronic and thermal Energies=      | -1627.331989                |
| Sum of electronic and thermal Enthalpies=    | -1627.331045                |
| Sum of electronic and thermal Free Energies= | -1627.417879                |

|    |             |             |             |
|----|-------------|-------------|-------------|
| C  | -1.19995000 | -2.99760700 | 0.48615400  |
| C  | -2.12743300 | -3.46970500 | -0.45271200 |
| C  | -1.48479800 | -3.10280300 | 1.85569000  |
| C  | -3.34118900 | -4.01852500 | -0.02326000 |
| C  | -2.69967300 | -3.65928300 | 2.27890000  |
| C  | -3.62931200 | -4.11416400 | 1.34145600  |
| H  | -2.91208600 | -3.73708600 | 3.34246900  |
| H  | -4.57045600 | -4.54564500 | 1.67144700  |
| C  | 2.01934900  | -4.42900500 | -0.73548800 |
| O  | 0.95858800  | -3.83065400 | -1.13468800 |
| C  | 2.47828300  | -5.55791700 | -1.69454500 |
| O  | 2.73348200  | -4.19996600 | 0.24028300  |
| Pd | 0.46754200  | -2.12046700 | -0.09687000 |
| O  | -0.17800300 | -0.19496300 | 0.93634800  |
| C  | 4.79171100  | -1.85178900 | -1.10016300 |
| H  | 4.77189200  | -1.34960800 | -2.07093600 |
| H  | 5.77972000  | -1.77476300 | -0.63798900 |
| H  | 4.50482300  | -2.89955200 | -1.19776600 |
| C  | 4.18238800  | 0.63903000  | -0.08667200 |
| H  | 3.49024900  | 1.25545500  | 0.49074000  |
| H  | 5.18040500  | 0.68330400  | 0.35771200  |
| H  | 4.20282600  | 0.96301900  | -1.13033100 |
| S  | 3.57469100  | -1.07183900 | 0.00323600  |
| O  | 2.24771900  | -1.03440200 | -0.81910400 |
| H  | -4.05833200 | -4.37613900 | -0.75832400 |
| F  | 1.51399700  | -5.98725600 | -2.52511600 |
| F  | 2.93636300  | -6.62024600 | -1.00960900 |
| F  | 3.49907000  | -5.09210500 | -2.45729400 |
| C  | -1.26670800 | 0.16038600  | 1.21570500  |
| O  | -2.32493000 | 0.54483700  | 1.49816000  |
| H  | -1.90711300 | -3.41531100 | -1.51582200 |
| H  | -0.76613000 | -2.76244700 | 2.59864000  |

para-chloro-bismethoxy SYSTEM

B3LYP/6-31G(d) (SDD for PD)  
in DCM

9

Zero-point correction= 0.352750 (Hartree/Particle)  
Thermal correction to Energy= 0.389259  
Thermal correction to Enthalpy= 0.390204  
Thermal correction to Gibbs Free Energy= 0.278214  
Sum of electronic and zero-point Energies= -2869.087389  
Sum of electronic and thermal Energies= -2869.050880  
Sum of electronic and thermal Enthalpies= -2869.049936  
Sum of electronic and thermal Free Energies= -2869.161926

|    |             |             |             |
|----|-------------|-------------|-------------|
| C  | 0.20641600  | 1.66718000  | 2.57240200  |
| C  | -0.27095000 | 1.43378000  | 3.87249900  |
| C  | 0.23080300  | 2.98152200  | 2.07963800  |
| C  | -0.70647200 | 2.49360400  | 4.68201000  |
| C  | -0.20590700 | 4.05658100  | 2.86769400  |
| C  | -0.66103900 | 3.77908900  | 4.15257500  |
| H  | -0.19659500 | 5.07397300  | 2.50188900  |
| C  | 1.59366500  | -4.09150800 | -1.21047200 |
| O  | 0.68361100  | 3.12703100  | 0.800245600 |
| C  | 0.72124200  | 4.43590500  | 0.23435200  |
| H  | 1.38926000  | 5.09522600  | 0.80031200  |
| H  | 1.10805400  | 4.30772200  | -0.77704300 |
| O  | -0.28093900 | 4.87698700  | 0.18879100  |
| H  | 0.44924500  | -3.64910600 | -0.83744200 |
| C  | 1.43931800  | -5.42008300 | -1.99925800 |
| O  | 2.71559700  | -3.61614500 | -1.05027100 |
| Pd | 0.27894100  | -1.90718000 | 0.22598900  |
| O  | 1.94387900  | 0.37597600  | 1.55496200  |
| C  | 3.10305500  | -1.00385100 | -2.98472300 |
| H  | 2.42741400  | -0.57371900 | -3.72797700 |
| H  | 4.12928100  | -0.66137100 | -3.14340700 |
| H  | 3.06557100  | -2.09369100 | -2.99749600 |
| C  | 2.62988500  | 1.30358300  | -1.52974400 |
| H  | 2.24530300  | 1.73168300  | -0.60278300 |
| H  | 3.67054900  | 1.60228300  | -1.68398300 |
| H  | 2.01101500  | 1.58849900  | -2.38421700 |
| S  | 2.58189900  | -0.49701600 | -1.32227200 |
| O  | 1.02717000  | -0.80936500 | -1.34821600 |
| H  | -1.06995500 | 2.33207300  | 5.68744100  |
| O  | -0.26831300 | 0.13357100  | 4.28079300  |
| C  | -0.64223500 | -0.16189900 | 5.62670600  |
| H  | -1.68519900 | 0.11428900  | 5.82005000  |
| H  | -0.52658500 | -1.24082900 | 5.73397200  |
| H  | 0.01269500  | 0.34980200  | 6.34113000  |
| F  | 2.62638100  | -5.98588900 | -2.26506400 |
| F  | 0.81664900  | -5.19577600 | -3.17869500 |
| F  | 0.69898800  | -6.31683400 | -1.31334600 |
| C  | 0.73019200  | 0.52213300  | 1.72917000  |
| O  | -0.21278400 | -0.22905100 | 1.25002900  |
| S  | -1.87488100 | -3.44088000 | 2.09500000  |
| O  | -0.38421200 | -3.04397300 | 1.82229600  |
| C  | -2.54236700 | -4.14297100 | 0.55748600  |
| H  | -2.46003200 | -3.41300700 | -0.25122800 |
| H  | -1.95437400 | -5.03265000 | 0.32673000  |
| H  | -3.58559500 | -4.41408200 | 0.74223300  |
| C  | -2.84203200 | -1.90473800 | 2.15881300  |
| H  | -2.43446600 | -1.30768200 | 2.97630600  |
| H  | -2.74537400 | -1.36412700 | 1.21534500  |
| H  | -3.88205700 | -2.17582200 | 2.36050400  |
| Cl | -1.21031500 | 5.12176700  | 5.15746500  |

12

Zero-point correction= 0.270531 (Hartree/Particle)  
Thermal correction to Energy= 0.300125  
Thermal correction to Enthalpy= 0.301070  
Thermal correction to Gibbs Free Energy= 0.204561  
Sum of electronic and zero-point Energies= -2315.941881  
Sum of electronic and thermal Energies= -2315.912287  
Sum of electronic and thermal Enthalpies= -2315.911343  
Sum of electronic and thermal Free Energies= -2316.007851

|    |             |             |             |
|----|-------------|-------------|-------------|
| C  | -1.93454400 | 0.46452000  | -0.76559900 |
| C  | -2.04136900 | 1.31829400  | 0.34365200  |
| C  | -2.45406100 | 0.87445300  | -2.00425000 |
| C  | -2.66308400 | 2.57042800  | 0.22870000  |
| C  | -3.08336500 | 2.12068200  | -2.14152800 |
| C  | -3.16825000 | 2.93426400  | -1.01586500 |
| C  | -3.49528700 | 2.45115800  | -3.08503300 |
| H  | 0.50919300  | -4.96050300 | -2.00260800 |
| O  | 1.56903100  | -4.70435000 | -1.35935500 |
| C  | 0.33742500  | -6.34197900 | -2.65190600 |
| O  | -0.38588600 | -4.07975100 | -2.16020000 |
| Pd | 0.84042900  | -2.71505800 | -1.08243600 |
| O  | -0.07530800 | -0.93205800 | -1.09571900 |
| C  | 3.54141700  | -0.73468100 | 1.96585600  |
| H  | 4.44975700  | -0.73752500 | 1.35914200  |
| H  | 3.52121700  | 0.12356300  | 2.64238700  |
| H  | 3.45295300  | -1.66206900 | 2.53467400  |
| C  | 2.48907100  | 0.87515900  | -0.03965900 |
| H  | 1.70817200  | 0.98376200  | -0.79328600 |
| H  | 2.46522500  | 1.71731100  | 0.65740600  |
| H  | 3.47373400  | 0.77313900  | -0.50191000 |
| S  | 2.09329800  | -0.63708400 | 0.88142300  |
| O  | 2.40968900  | -1.81740200 | -0.13204800 |
| H  | -2.75231400 | 3.24332900  | 1.07042000  |
| F  | 0.88388600  | -7.29736300 | -1.88742800 |
| F  | 0.95683100  | -6.34913400 | -3.84786900 |
| C  | -0.95630800 | -6.62681800 | -2.84298700 |
| F  | -1.29836300 | -0.89834800 | -0.61740300 |
| O  | -1.88921800 | -1.83933000 | -0.09925400 |
| O  | -2.31240300 | -0.01443500 | -3.02315200 |
| O  | -1.49508700 | 0.85169900  | 1.49921600  |
| C  | -2.83273900 | 0.32363300  | -4.30877800 |
| H  | -3.91754100 | 0.47508000  | -4.27011800 |
| H  | -2.34864000 | 1.22198800  | -4.70878400 |
| H  | -2.60640100 | -0.52812400 | -4.95065900 |
| C  | -1.60676600 | 1.64576800  | 2.67983100  |
| H  | -1.12791000 | 1.06719300  | 3.47036000  |
| H  | -1.08973800 | 2.60538300  | 2.56415100  |
| H  | -2.65659500 | 1.82212500  | 2.94022600  |
| Cl | -3.95398700 | 4.50582400  | -1.17405700 |



## 12a

Zero-point correction= 0.270551 (Hartree/Particle)  
 Thermal correction to Energy= 0.300119  
 Thermal correction to Enthalpy= 0.301063  
 Thermal correction to Gibbs Free Energy= 0.204556  
 Sum of electronic and zero-point Energies= -2315.936897  
 Sum of electronic and thermal Energies= -2315.907329  
 Sum of electronic and thermal Enthalpies= -2315.906385  
 Sum of electronic and thermal Free Energies= -2316.002892

|    |             |             |             |
|----|-------------|-------------|-------------|
| C  | -1.48260800 | -1.72967000 | 1.21526600  |
| C  | -2.71081000 | -2.35874400 | 0.95500500  |
| C  | -0.75733100 | -2.08678000 | 2.36296500  |
| C  | -3.20524100 | -3.35223900 | 1.81281300  |
| C  | -1.23162800 | -3.07646900 | 3.23581300  |
| C  | -2.44779200 | -3.68194000 | 2.93231800  |
| H  | -0.68588200 | -3.36615900 | 4.12317500  |
| C  | 0.00450900  | -4.99521300 | -1.38498300 |
| O  | 0.41194900  | -1.41328500 | 2.55037700  |
| C  | 1.19496700  | -1.70836000 | 3.70728900  |
| H  | 1.53013900  | -2.75189100 | 3.70378800  |
| H  | 2.06056900  | -1.04758700 | 3.65327000  |
| H  | 0.63478800  | -1.50331000 | 4.62658500  |
| O  | 1.23353100  | -4.71678200 | -1.25856500 |
| C  | -0.41888400 | -6.45169200 | -1.62618100 |
| O  | -0.88067300 | -4.09892600 | -1.26431300 |
| Pd | 0.67523700  | -2.70121100 | -0.85530400 |
| O  | -0.14673500 | -0.89480600 | -0.63378200 |
| C  | 4.37597100  | -0.23668000 | 0.24880400  |
| H  | 4.96456300  | -0.62309600 | -0.58595900 |
| H  | 4.62822800  | 0.80549300  | 0.46112400  |
| H  | 4.52373300  | -0.84670800 | 1.14177600  |
| C  | 2.60939500  | 0.63044700  | -1.71246500 |
| H  | 1.59564000  | 0.56193600  | -2.10975600 |
| H  | 2.85304500  | 1.67088800  | -1.48047200 |
| H  | 3.33502400  | 0.19924000  | -2.40638900 |
| S  | 2.61320100  | -0.31628100 | -0.16370700 |
| O  | 2.51064800  | -1.83396700 | -0.62389900 |
| H  | -4.14504600 | -3.85266600 | 1.62486400  |
| O  | -3.35374000 | -1.94370900 | -0.16860900 |
| C  | -4.59492900 | -2.55746300 | -0.51545900 |
| H  | -5.34870700 | -2.39515700 | 0.26351300  |
| H  | -4.91504800 | -2.07257100 | -1.43807800 |
| H  | -4.46927100 | -3.63200100 | -0.69071300 |
| F  | -0.53135700 | -7.08153600 | -0.44114700 |
| F  | 0.49433600  | -7.09729100 | -2.36360600 |
| F  | -1.60141300 | -6.51008200 | -2.25106400 |
| O  | -1.00880800 | -0.60485500 | 0.32154500  |
| C  | -1.42304800 | 0.53639700  | 0.47417400  |
| Cl | -3.05966700 | -4.92660600 | 4.02257500  |

## TS-1

Zero-point correction= 0.270030 (Hartree/Particle)  
 Thermal correction to Energy= 0.299083  
 Thermal correction to Enthalpy= 0.300028  
 Thermal correction to Gibbs Free Energy= 0.205415  
 Sum of electronic and zero-point Energies= -2315.931577  
 Sum of electronic and thermal Energies= -2315.902524  
 Sum of electronic and thermal Enthalpies= -2315.901580  
 Sum of electronic and thermal Free Energies= -2315.996192

|    |             |             |             |
|----|-------------|-------------|-------------|
| Pd | -0.38777200 | 0.15575000  | -0.62957900 |
| S  | -3.37986500 | -0.80820600 | -0.36670200 |
| F  | 4.11354000  | -1.26407600 | -2.19617900 |
| F  | 2.95154700  | -2.98500500 | -1.54262000 |
| F  | 3.87855100  | -1.67321800 | -0.07017100 |
| O  | 1.03296700  | -1.31582500 | -0.50164500 |
| O  | -1.87698400 | -1.21517600 | -0.08452200 |
| O  | -1.74324700 | 1.61164100  | -0.78747500 |
| O  | 1.93980700  | 0.25578400  | -1.80378800 |
| O  | -1.94221600 | 3.78342100  | -0.29921000 |
| C  | 1.98361000  | -0.83185500 | -1.21475400 |
| C  | 3.25479600  | -1.70334800 | -1.26631600 |
| C  | -4.18847900 | -2.43024400 | -0.34240700 |
| C  | -3.97443600 | -0.13278300 | 1.20999500  |
| C  | -1.29854400 | 2.74698100  | -0.29144500 |
| H  | -5.26960000 | -2.27338800 | -0.38339600 |
| H  | -3.85385000 | -2.96773500 | -1.23157800 |
| H  | -3.90034400 | -2.96513000 | 0.56528000  |
| H  | -5.04082500 | 0.08714500  | 1.11039100  |
| H  | -3.79231700 | -0.85329400 | 2.01086500  |
| H  | -3.41381400 | 0.78796300  | 1.38079400  |
| C  | 0.09653900  | 2.65697300  | 0.30310100  |
| C  | 0.25580600  | 2.34839100  | 1.67566500  |
| C  | 1.22282000  | 3.06571200  | -0.44590700 |
| C  | 1.51954300  | 2.38110200  | 2.27431300  |
| C  | 2.49528200  | 3.10248700  | 0.14139500  |
| C  | 2.60533700  | 2.75774600  | 1.48435300  |
| H  | 1.66518300  | 2.13557400  | 3.31703700  |
| H  | 3.37256000  | 3.39224700  | -0.41983600 |
| O  | 0.97334600  | 3.40820300  | -1.72996300 |
| O  | -0.88668200 | 2.03427700  | 2.33554300  |
| C  | 2.07845700  | 3.68459400  | -2.59626000 |
| H  | 2.74727100  | 2.82012600  | -2.65273200 |
| H  | 1.63970500  | 3.87861800  | -3.57505600 |
| C  | 2.62936500  | 4.57017800  | -2.26107100 |
| H  | -0.80832100 | 1.68327500  | 3.72021100  |
| H  | -1.83311500 | 1.47611100  | 4.02792700  |
| H  | -0.19210200 | 0.78892900  | 3.86381300  |
| H  | -0.40691200 | 2.51207000  | 4.31311600  |
| Cl | 4.19852600  | 2.80137500  | 2.22980600  |

## 13

|                                              |                             |
|----------------------------------------------|-----------------------------|
| Zero-point correction=                       | 0.270295 (Hartree/Particle) |
| Thermal correction to Energy=                | 0.299975                    |
| Thermal correction to Enthalpy=              | 0.300919                    |
| Thermal correction to Gibbs Free Energy=     | 0.205187                    |
| Sum of electronic and zero-point Energies=   | -2315.948162                |
| Sum of electronic and thermal Energies=      | -2315.918482                |
| Sum of electronic and thermal Enthalpies=    | -2315.917538                |
| Sum of electronic and thermal Free Energies= | -2316.013271                |

|    |             |             |             |
|----|-------------|-------------|-------------|
| C  | -1.48700400 | -2.11246900 | 0.84890200  |
| C  | -2.39223000 | -2.63955300 | -0.14256600 |
| C  | -1.10781100 | -2.97356100 | 1.94185300  |
| C  | -2.73261800 | -3.99226100 | -0.14798300 |
| C  | -1.44721900 | -4.32760500 | 1.93185000  |
| C  | -2.24100600 | -4.79495500 | 0.88342300  |
| H  | -1.13089600 | -5.00236100 | 2.71478100  |
| C  | 1.82482600  | -4.45782600 | -0.34496500 |
| O  | -0.43309600 | -2.37157400 | 2.92881100  |
| C  | 0.11153200  | -3.16459000 | 3.99621100  |
| H  | 0.81724700  | -3.90216600 | 3.60191200  |
| H  | 0.63173900  | -2.45841400 | 4.64171900  |
| H  | -0.68715600 | -3.66074400 | 4.55563500  |
| O  | 0.80265800  | -3.87268600 | -0.85775800 |
| C  | 2.01353100  | -5.87554100 | -0.94685800 |
| O  | 2.61672100  | -4.05122300 | 0.50254000  |
| Pd | 0.38280500  | -1.96767500 | -0.24785700 |
| O  | -0.29085600 | -0.17006000 | 0.41263500  |
| C  | 4.67414800  | -1.83013100 | -0.87642100 |
| H  | 4.77190000  | -1.79529600 | -1.96424200 |
| H  | 5.58404200  | -1.47301400 | -0.38650800 |
| H  | 4.42589000  | -2.83646200 | -0.53456700 |
| C  | 3.79844100  | 0.78953400  | -1.13847500 |
| H  | 3.00056400  | 1.51172000  | -0.95491600 |
| H  | 4.72585900  | 1.12670400  | -0.66779800 |
| H  | 3.93624000  | 0.63105000  | -2.21086800 |
| S  | 3.29322200  | -0.77105700 | -0.36208600 |
| O  | 2.09148700  | -1.24206900 | -1.26496400 |
| H  | -3.37004200 | -4.41922900 | -0.90942100 |
| O  | -2.85757100 | -1.73911000 | -1.01729900 |
| C  | -3.68668700 | -2.17717600 | -2.10565600 |
| H  | -4.61012200 | -2.62724600 | -1.72924800 |
| H  | -3.91747300 | -1.27595500 | -2.67177000 |
| H  | -3.14555900 | -2.88812200 | -2.73749500 |
| F  | 3.06767300  | -6.50833000 | -0.41020000 |
| F  | 2.20992100  | -5.80515000 | -2.28122600 |
| F  | 0.92045000  | -6.63951600 | -0.73475800 |
| C  | -1.37473800 | -0.58015200 | 1.02026800  |
| O  | -2.18307900 | 0.09725400  | 1.62676700  |
| Cl | -2.66507200 | -6.49027300 | 0.87163100  |

## TS-2

|                                              |                             |
|----------------------------------------------|-----------------------------|
| Zero-point correction=                       | 0.267914 (Hartree/Particle) |
| Thermal correction to Energy=                | 0.297703                    |
| Thermal correction to Enthalpy=              | 0.298647                    |
| Thermal correction to Gibbs Free Energy=     | 0.202646                    |
| Sum of electronic and zero-point Energies=   | -2315.925936                |
| Sum of electronic and thermal Energies=      | -2315.896147                |
| Sum of electronic and thermal Enthalpies=    | -2315.895203                |
| Sum of electronic and thermal Free Energies= | -2315.991204                |

|    |             |             |             |
|----|-------------|-------------|-------------|
| C  | -1.36075700 | -2.58524100 | 0.68347100  |
| C  | -2.49676600 | -2.78345300 | -0.15620100 |
| C  | -1.34714100 | -3.24415700 | 1.94875200  |
| C  | -3.60405300 | -3.51950000 | 0.27613900  |
| C  | -2.44635100 | -3.98366200 | 2.39698300  |
| C  | -3.54444800 | -4.09465200 | 1.54516700  |
| H  | -2.46057800 | -4.46880600 | 3.36316100  |
| C  | 1.90816500  | -4.27574000 | -0.62027700 |
| O  | 0.82305100  | -3.70349700 | -0.99131800 |
| C  | 2.28307100  | -5.49984900 | -1.49469700 |
| O  | 2.69881100  | -3.96466000 | 0.27023600  |
| Pd | 0.36615300  | -1.91000900 | -0.11983400 |
| O  | -0.43594300 | -0.18116300 | 0.76898400  |
| C  | 4.66636500  | -1.75455300 | -1.20034800 |
| H  | 4.63992700  | -1.33753200 | -2.21032200 |
| H  | 5.65123900  | -1.61999100 | -0.74473200 |
| H  | 4.39582700  | -2.81114000 | -1.20457400 |
| C  | 3.97910000  | 0.80626100  | -0.42405100 |
| H  | 3.26307100  | 1.44975400  | 0.09126900  |
| H  | 4.97292800  | 0.92785100  | 0.01498800  |
| H  | 3.99262100  | 1.02834700  | -1.49400700 |
| S  | 3.43201400  | -0.90754600 | -0.17012600 |
| O  | 2.10659500  | -0.98601400 | -1.00283600 |
| H  | -4.48195800 | -3.65863500 | -0.33957000 |
| F  | 1.26304800  | -5.97238700 | -2.22989600 |
| F  | 2.74916800  | -6.51006100 | -0.73836900 |
| F  | 3.27221600  | -5.13843900 | -2.34893000 |
| C  | -1.50898700 | -0.56324200 | 1.23366800  |
| O  | -2.50230800 | -0.28807700 | 1.81152200  |
| O  | -2.43339200 | -2.18941400 | -1.36767700 |
| C  | -0.22538900 | -3.07361800 | 2.68188800  |
| C  | -0.16078000 | -3.62517000 | 4.00278500  |
| H  | -0.23778200 | -4.71702200 | 3.97438700  |
| H  | 0.81632700  | -3.33692200 | 4.38952800  |
| H  | -0.94880300 | -3.21002700 | 4.63990900  |
| C  | -3.56595900 | -2.26210300 | -2.24235700 |
| H  | -3.28451800 | -1.69503600 | -3.12926200 |
| H  | -3.77843000 | -3.29961700 | -2.52034500 |
| H  | -4.44879600 | -1.81013300 | -1.77808700 |
| Cl | -4.92926300 | -5.01897700 | 2.09860300  |

**7+CO<sub>2</sub>**

|                                              |                             |
|----------------------------------------------|-----------------------------|
| Zero-point correction=                       | 0.268158 (Hartree/Particle) |
| Thermal correction to Energy=                | 0.299185                    |
| Thermal correction to Enthalpy=              | 0.300129                    |
| Thermal correction to Gibbs Free Energy=     | 0.199119                    |
| Sum of electronic and zero-point Energies=   | -2315.938613                |
| Sum of electronic and thermal Energies=      | -2315.907586                |
| Sum of electronic and thermal Enthalpies=    | -2315.906642                |
| Sum of electronic and thermal Free Energies= | -2316.007652                |

|    |             |             |             |
|----|-------------|-------------|-------------|
| C  | -1.18223500 | -2.88696500 | 0.50230300  |
| C  | -2.26765600 | -3.27339600 | -0.29960100 |
| C  | -1.23389000 | -3.15939200 | 1.87626200  |
| C  | -3.37830400 | -3.93536200 | 0.25210900  |
| C  | -2.32961900 | -3.81771600 | 2.45771900  |
| C  | -3.37390800 | -4.19342000 | 1.61919900  |
| H  | -2.37645200 | -4.03288000 | 3.51684200  |
| C  | 1.92059000  | -4.33417800 | -0.90946900 |
| O  | -0.15403600 | -2.72340800 | 2.60973400  |
| C  | -0.11906700 | -3.00497900 | 4.00877600  |
| H  | -0.14770400 | -4.08439600 | 4.19568100  |
| H  | 0.82687400  | -2.59842500 | 4.36836200  |
| H  | -0.94901700 | -2.51775400 | 4.53382700  |
| O  | 0.84874800  | -3.72374300 | -1.26693800 |
| C  | 2.18342200  | -5.56385900 | -1.82028900 |
| O  | 2.71557200  | -4.07394900 | -0.00928900 |
| Pd | 0.41834700  | -1.99419900 | -0.26271700 |
| O  | -0.04477400 | -0.10991000 | 0.88575900  |
| C  | 4.71640100  | -1.68315000 | -1.15156800 |
| H  | 4.72505800  | -1.38131200 | -2.20201100 |
| H  | 5.67365600  | -1.46360400 | -0.67072200 |
| H  | 4.47411600  | -2.74190600 | -1.04741700 |
| C  | 3.93624600  | 0.92168500  | -0.65912500 |
| H  | 3.18435400  | 1.59373800  | -0.24066300 |
| H  | 4.90508600  | 1.10411600  | -0.18674400 |
| H  | 3.99820100  | 1.04476800  | -1.74339400 |
| S  | 3.40963900  | -0.77443900 | -0.27606600 |
| O  | 2.12619200  | -0.96379500 | -1.14961000 |
| H  | -4.22128800 | -4.23998800 | -0.35348200 |
| O  | -2.18190600 | -2.95617200 | -1.62678500 |
| C  | -3.22234500 | -3.38503800 | -2.50133800 |
| H  | -4.18249800 | -2.92374900 | -2.23982300 |
| H  | -2.92436900 | -3.05772400 | -3.49825200 |
| H  | -3.32716600 | -4.47661600 | -2.49233700 |
| F  | 3.27395500  | -6.24305000 | -1.43341300 |
| F  | 2.37383200  | -5.17408500 | -3.09990000 |
| F  | 1.13792400  | -6.41645500 | -1.80359800 |
| C  | -0.37496400 | 0.07777600  | 2.00107800  |
| O  | -0.70219800 | 0.32643700  | 3.08688000  |
| Cl | -4.76413100 | -5.02720000 | 2.32496200  |
